# Supplementary material for: Asymmetric synthesis of pyrrolo[1,2-a]indoles via bifunctional tertiary amine catalyzed [3 + 2] annulation of 2-nitrovinylindoles with azlactones
Source: Royal Society of Chemistry journal article supplement (doi:10.1039/d4qo01557f), 2024-01-01
Supplement: d4qo01557f1.pdf [file d4qo01557f1.pdf]

## Supporting Information

### Asymmetric Synthesis of Pyrrolo[1,2-a]indoles via Bifunctional Tertiary Amine Catalyzed [3+2] Annulation of 2-Nitrovinylindoles with Azlactones

Jiang Deng,<sup>a§</sup> Junyuan Yan,<sup>a§</sup> Wei Li,<sup>a</sup> Xiaomei Li,<sup>a</sup> Zhiming Li,<sup>a</sup> Song Wu,<sup>a</sup> Jiachen Xie,<sup>a</sup> Zhouyu Wang,<sup>b,c</sup> Shan Qian,<sup>\*a, c</sup> and Xiao-Long He,<sup>\*a, c</sup>

<sup>a</sup> Department of Pharmaceutical Engineering, School of Food and Bioengineering, Xihua University, Chengdu 610039, China.

<sup>b</sup> Department of Chemistry, School of Science, Xihua University, Chengdu 610039, China.

<sup>c</sup> Asymmetric Synthesis and Chiral Technology Key Laboratory of Sichuan Province, Research and Application of Small Organic Chiral Molecules Key Laboratory of Yibin City, Department of Chemistry, Xihua University, Chengdu 610039, China.

<sup>§</sup>These authors contributed equally to this work.

\*correspondence: xlhe1021@sina.com;

## Table of Contents

|                                                                                                                              |    |
|------------------------------------------------------------------------------------------------------------------------------|----|
| 1. General Information .....                                                                                                 | 2  |
| 2. General procedure for the [3+2] or [4+2] Annulation of 2-Nitrovinyl indoles or 7-Nitrovinyl indoles with Azlactones ..... | 2  |
| 3. Asymmetric [3+2] cyclization reactions of other types of functionalized indoles.....                                      | 18 |
| 4. Synthetic transformations .....                                                                                           | 20 |
| 5. Failed trials of other azlactones under the optimized conditions .....                                                    | 22 |
| 6. Crystal data for enantiopure cycloadducts 3x.....                                                                         | 23 |
| 7. NMR spectra and HPLC chromatograms .....                                                                                  | 25 |

## 1. General Information

NMR spectra were recorded with tetramethylsilane as the internal standard.  $^1\text{H}$ -NMR spectra were recorded at 400 MHz,  $^{13}\text{C}$ -NMR spectra were recorded at 100 MHz. Chemical shifts were reported in ppm downfield from  $\text{CDCl}_3$  ( $\delta = 7.26$  ppm) or  $(\text{CD}_3)_2\text{SO}$  ( $\delta = 2.50$  ppm) for  $^1\text{H}$  NMR and relative to the central  $\text{CDCl}_3$  resonance ( $\delta = 77.0$  ppm) or  $(\text{CD}_3)_2\text{SO}$  resonance ( $\delta = 39.52$  ppm) for  $^{13}\text{C}$  NMR spectroscopy. Coupling constants are given in Hz. Enantiomeric excess was determined by HPLC analysis on Daicel Chiralpak AD-H Column (4.6 mm $\times$ 250 mmL), Chiralpak AS-H Column (4.6 mm $\times$ 250 mmL), Chiralpak IB N-5 Column (4.6 mm $\times$ 250 mmL), Chiralpak OD-H Column (4.6 mm $\times$ 250 mmL). UV detection was monitored at 254 nm. TLC was performed on glass-backed silica plates. UV light was used to visualize products. Column chromatography was performed using silica gel (200-300 mesh) eluting with EtOAc/petroleum ether or MeOH/DCM. Unless otherwise noted, commercial reagents were used as received and all reactions were carried out directly in air atmosphere. Nitroolefin indole compounds (**1a-1l**, **1a-Me**, **4a-4c**, **7a**)<sup>[1]</sup> and azelactones (**2a-2t**)<sup>[2]</sup> were synthesized according to reported procedures.

## 2. General procedure for the [3+2] or [4+2] Annulation of 2-Nitrovinyl indoles or 7-Nitrovinyl indoles with Azlactones

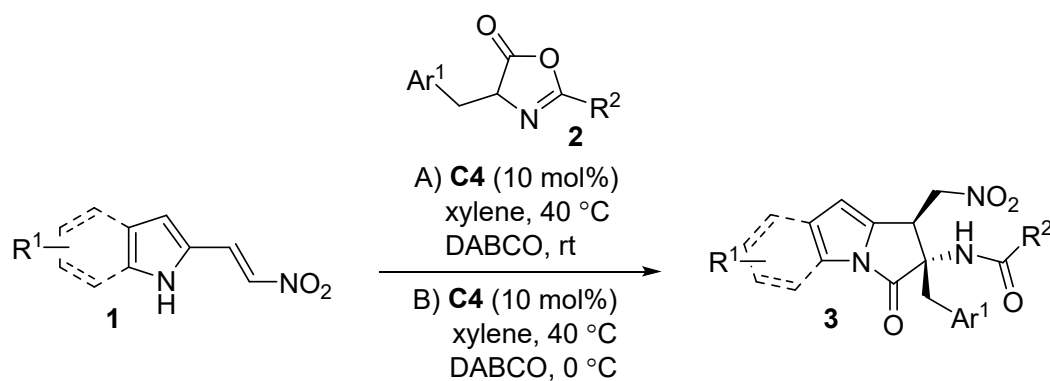

**General procedure A:** In a 10 mL reaction tube, 2-nitroolefin indole **1** (0.1 mmol, 1.0 eq), azlactones **2** (0.12 mmol, 1.2 eq) and catalyst **C4** (10 mol%) were dissolved in xylene (1.0 mL), the reaction mixture was stirred for 12-24 h at 40 °C and monitored by TLC. Upon consumption, the reaction mixture was removed to room temperature and added DABCO (2.7 mg, 30 mol%) for

further cyclization during 2-12 h. After the reaction was completed, the residue was purified by flash chromatography (EtOAc/petroleum ether = 1/10) to afford the pure chiral product **3**.

**General procedure B:** In a 10 mL reaction tube, 2-nitroolefin indole **1** (0.1 mmol, 1.0 eq), azlactones **2** (0.12 mmol, 1.2 eq) and catalyst **C4** (10 mol%) were dissolved in xylene (1.0 mL), the mixture was stirred for 12-24 h at 40 °C and monitored by TLC. After full-conversion, the residue was purified by flash chromatography (EtOAc/petroleum ether = 1/20) to afford the pure chiral product **3'**. Subsequently, the obtained **3'** was dissolved in DCM (1.0 mL), then DABCO (2.7 mg, 30 mol%) was added to the reaction mixture and stirred at 0 °C for 2-12 h. After the reaction was completed, the residue was purified by flash chromatography (EtOAc/petroleum ether = 1/10) to afford the pure chiral product **3**.

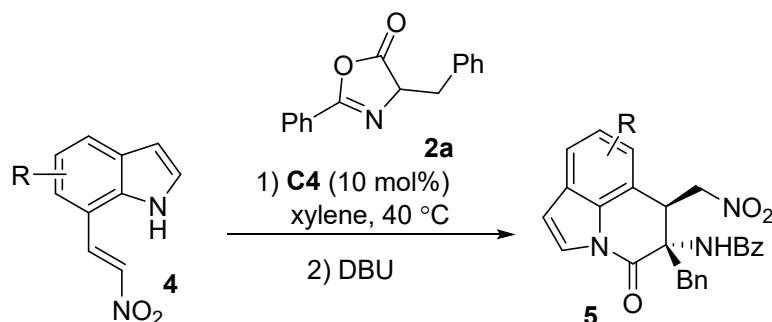

**General procedure C:** In a 10 mL reaction tube, 7-nitroolefin indole **4** (0.1 mmol, 1.0 eq), azlactones **2** (0.12 mmol, 1.2 eq) and catalyst **C4** (10 mol%) were dissolved in xylene (1.0 mL), the mixture was stirred for 12-24 h at 40 °C and monitored by TLC. After full-conversion, the residue was purified by flash chromatography (EtOAc/petroleum ether = 1/20) to afford the pure chiral product **5'**. Subsequently, the obtained **5'** was dissolved in DCM (1.0 mL), then DBU (2.7 mg, 30 mol%) was added to the reaction mixture and stirred at 0 °C for 2-12 h. After the reaction was completed, the residue was purified by flash chromatography (EtOAc/petroleum ether = 1/10) to afford the pure chiral product **5**.

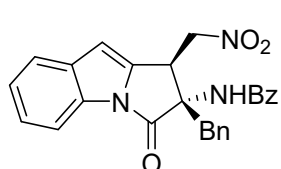

**Synthesis of 3a (procedure B):** (*E*)-2-(2-nitrovinyl)-1*H*-indole **1a** (18.8 mg, 0.1 mmol), 4-benzyl-2-phenyloxazol-5(4*H*)-one **2a** (30.1 mg, 0.12 mmol), **C4** (6.3 mg, 10 mol%) were dissolved in xylene (1.0 mL) and stirred at 40

°C for 16 h. Upon workup, product **3a'** was obtained by flash chromatography on silica gel (EtOAc/petroleum ether = 1/20). Subsequently, **3a'** was dissolved in DCM (1.0 mL), then DABCO (2.7 mg, 30 mol%) was added to the reaction mixture and stirred at 0 °C for 6 h. After the reaction

was completed, the residue was purified by flash chromatography (EtOAc/petroleum ether = 1/10) to afford product **3a** as a white solid (31.1 mg, 71% yield). M.p = 96-100 °C;  $[\alpha]_D^{20} = -28.2$  ( $c = 1.0$  in  $\text{CHCl}_3$ ); >19:1 dr, 90% ee, determined by HPLC analysis [Daicel chiralpak AD-H, *n*-hexane/*i*-PrOH = 70/30, 1.0 mL/min,  $\lambda = 254$  nm,  $t$  (minor) = 21.04 min,  $t$  (major) = 9.96 min];  $^1\text{H}$  NMR (400 MHz,  $\text{CDCl}_3$ ):  $\delta$  9.04 (s, 1H), 7.83 – 7.77 (m, 2H), 7.58 – 7.49 (m, 2H), 7.41 (t,  $J = 7.8$  Hz, 3H), 7.21 – 7.13 (m, 1H), 7.09 – 7.00 (m, 4H), 6.97 – 6.91 (m, 2H), 6.56 (dd,  $J = 2.1, 0.9$  Hz, 1H), 4.56 (dd,  $J = 12.2, 10.3$  Hz, 1H), 4.45 – 4.34 (m, 2H), 3.04 (d,  $J = 13.5$  Hz, 1H), 2.91 (d,  $J = 13.5$  Hz, 1H) ppm;  $^{13}\text{C}$  NMR (100 MHz,  $\text{CDCl}_3$ ):  $\delta$  177.55, 162.39, 136.87, 133.79, 132.59, 131.15, 130.29, 129.12, 128.39, 128.23, 127.92, 127.84, 124.53, 122.91, 121.00, 120.39, 111.39, 105.50, 76.38, 75.87, 43.70, 42.61 ppm; ESI-HRMS: calcd for  $\text{C}_{26}\text{H}_{21}\text{N}_3\text{O}_4 + \text{Na}^+$  462.1424, found 462.1416.

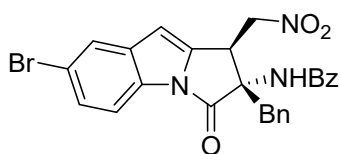

**Synthesis of 3b (procedure A):** (*E*)-5-bromo-2-(2-nitrovinyl)-1*H*-indole **1b** (26.7 mg, 0.1 mmol), 4-benzyl-2-phenyloxazol-5(4*H*)-one **2a** (30.1 mg, 0.12 mmol), **C4** (6.3 mg, 10 mol%) were dissolved in xylene

(1.0 mL) and stirred at 40 °C for 12 h. Upon workup, the reaction mixture was removed to room temperature and added DABCO (2.7 mg, 30 mol%) for further cyclization during 6 h. After the reaction was completed, product **3b** was obtained by flash chromatography on silica gel (EtOAc/petroleum ether = 1/10) as a light brown solid (36.3 mg, 70% yield). M.p = 86-90 °C;  $[\alpha]_D^{20} = -20.0$  ( $c = 1.0$  in  $\text{CHCl}_3$ ); >19:1 dr, 80% ee, determined by HPLC analysis [Daicel chiralpak AD-H, *n*-hexane/*i*-PrOH = 60/40, 1.0 mL/min,  $\lambda = 254$  nm,  $t$  (minor) = 21.92 min,  $t$  (major) = 9.09 min];  $^1\text{H}$  NMR (400 MHz,  $\text{CDCl}_3$ ):  $\delta$  7.86 (d,  $J = 8.5$  Hz, 1H), 7.65 (d,  $J = 7.6$  Hz, 2H), 7.58 (s, 1H), 7.48 (t,  $J = 7.4$  Hz, 1H), 7.38 (q,  $J = 8.0, 7.6$  Hz, 3H), 7.21 – 7.07 (m, 3H), 6.95 (d,  $J = 7.2$  Hz, 2H), 6.68 (s, 1H), 6.19 (s, 1H), 5.67 (dd,  $J = 13.4, 5.5$  Hz, 1H), 4.87 (dd,  $J = 13.4, 9.0$  Hz, 1H), 4.78 – 4.71 (m, 1H), 3.50 (d,  $J = 13.8$  Hz, 1H), 2.89 (d,  $J = 13.8$  Hz, 1H) ppm;  $^{13}\text{C}$  NMR (100 MHz,  $\text{CDCl}_3$ ):  $\delta$  168.36, 168.05, 139.78, 136.15, 132.98, 132.67, 132.51, 130.26, 129.30, 128.99, 128.70, 128.24, 127.76, 127.27, 124.28, 118.43, 115.25, 101.98, 74.14, 68.04, 42.32, 38.58 ppm; ESI-HRMS: calcd for  $\text{C}_{26}\text{H}_{20}\text{BrN}_3\text{O}_4 + \text{H}^+$  518.0710, found 518.0714.

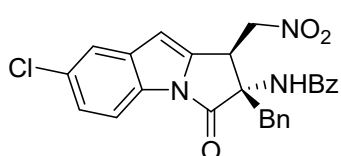

**Synthesis of 3c (procedure A):** (*E*)-5-chloro-2-(2-nitrovinyl)-1*H*-indole **1c** (22.2 mg, 0.1 mmol), 4-benzyl-2-phenyloxazol-5(4*H*)-one **2a** (30.1 mg, 0.12 mmol), **C4** (6.3 mg, 10 mol%) were dissolved in xylene

(1.0 mL) and stirred at 40 °C for 12 h. Upon workup, the reaction mixture was removed to room temperature and added DABCO (2.7 mg, 30 mol%) for further cyclization during 6 h. After the reaction was completed, product **3c** was obtained by flash chromatography on silica gel (EtOAc/petroleum ether = 1/10) as a milky white solid (32.6 mg, 69% yield). M.p = 90-93 °C;  $[\alpha]_D^{20} = +9.4$  ( $c = 1.0$  in  $\text{CHCl}_3$ ); >19:1 dr, 82% ee, determined by HPLC analysis [Daicel chiralpak AD-H, *n*-hexane/*i*-PrOH = 60/40, 1.0 mL/min,  $\lambda = 254$  nm,  $t$  (minor) = 20.12 min,  $t$  (major) = 8.45 min];  $^1\text{H}$  NMR (400 MHz,  $\text{DMSO}-d_6$ ):  $\delta$  9.14 (s, 1H), 7.94 – 7.86 (m, 3H), 7.70 (d,  $J = 2.0$  Hz, 1H), 7.66 – 7.60 (m, 1H), 7.58 – 7.52 (m, 2H), 7.37 (dd,  $J = 8.5, 2.1$  Hz, 1H), 7.19 – 7.15 (m, 2H), 7.13 – 7.09 (m, 3H), 6.40 (d,  $J = 2.1$  Hz, 1H), 5.36 (qd,  $J = 14.7, 7.1$  Hz, 2H), 4.74 (ddd,  $J = 8.1, 5.9, 1.9$  Hz, 1H), 3.40 (d,  $J = 14.2$  Hz, 1H), 3.10 (d,  $J = 14.2$  Hz, 1H) ppm;  $^{13}\text{C}$  NMR (100 MHz,  $\text{DMSO}-d_6$ ):  $\delta$  167.69, 166.91, 140.69, 135.06, 133.86, 132.93, 132.16, 130.07, 128.56, 128.50, 128.37, 127.82, 127.75, 127.07, 123.89, 120.78, 114.11, 100.44, 72.64, 67.91, 40.55, 37.81 ppm; ESI-HRMS: calcd for  $\text{C}_{26}\text{H}_{20}\text{ClN}_3\text{O}_4 + \text{Na}^+$  496.1035, found 496.1040.

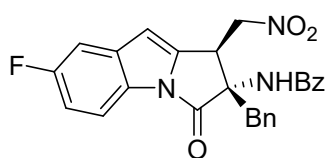

**Synthesis of 3d (procedure A):** (*E*)-5-fluoro-2-(2-nitrovinyl)-1*H*-indole **1d** (20.6 mg, 0.1 mmol), 4-benzyl-2-phenyloxazol-5(4*H*)-one **2a** (30.1 mg, 0.12 mmol), **C4** (6.3 mg, 10 mol%) were dissolved in xylene (1.0

mL) and stirred at 40 °C for 12 h. Upon workup, the reaction mixture was removed to room temperature and added DABCO (2.7 mg, 30 mol%) for further cyclization during 6 h. After the reaction was completed, product **3d** was obtained by flash chromatography on silica gel (EtOAc/petroleum ether = 1/10) as a white solid (28.8 mg, 63% yield). M.p = 86-91 °C;  $[\alpha]_D^{20} = -19.3$  ( $c = 1.0$  in  $\text{CHCl}_3$ ); >19:1 dr, 87% ee, determined by HPLC analysis [Daicel chiralpak AD-H, *n*-hexane/*i*-PrOH = 60/40, 1.0 mL/min,  $\lambda = 254$  nm,  $t$  (minor) = 16.75 min,  $t$  (major) = 8.07 min];  $^1\text{H}$  NMR (400 MHz,  $\text{DMSO}-d_6$ ):  $\delta$  9.12 (s, 1H), 7.95 – 7.86 (m, 3H), 7.65 – 7.60 (m, 1H), 7.56 (dd,  $J = 8.2, 6.6$  Hz, 2H), 7.44 (dd,  $J = 9.5, 2.5$  Hz, 1H), 7.22 – 7.15 (m, 3H), 7.14 – 7.08 (m, 3H), 6.40 (d,  $J = 1.8$  Hz, 1H), 5.36 (qd,  $J = 14.7, 7.1$  Hz, 2H), 4.75 (ddd,  $J = 8.1, 6.0, 1.9$  Hz, 1H), 3.41 (d,  $J = 14.3$  Hz, 1H), 3.10 (d,  $J = 14.2$  Hz, 1H) ppm;  $^{13}\text{C}$  NMR (100 MHz,  $\text{DMSO}-d_6$ ):  $\delta$  167.57, 166.91, 140.95, 134.90, 134.80, 133.91, 132.99, 132.15, 130.08, 128.50, 127.81, 127.75, 127.05, 126.70, 113.95, 111.70, 107.15, 100.88, 72.68, 67.85, 40.59, 37.86 ppm; ESI-HRMS: calcd for  $\text{C}_{26}\text{H}_{20}\text{FN}_3\text{O}_4 + \text{Na}^+$  480.1330, found 480.1332.

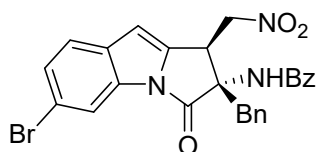

**Synthesis of 3e (procedure A):** (*E*)-6-bromo-2-(2-nitrovinyl)-1*H*-indole

**1e** (26.7 mg, 0.1 mmol), 4-benzyl-2-phenyloxazol-5(4*H*)-one **2a** (30.1 mg, 0.12 mmol), **C4** (6.3 mg, 10 mol%) were dissolved in xylene (1.0 mL) and stirred at 40 °C for 20 h. Upon workup, the reaction mixture was removed to room temperature and added DABCO (2.7 mg, 30 mol%) for further cyclization during 6 h. After the reaction was completed, product **3e** was obtained by flash chromatography on silica gel (EtOAc/petroleum ether = 1/10) as a pale yellow solid (42.4 mg, 82% yield). M.p = 203-206 °C;  $[\alpha]_D^{20} = -0.7$  ( $c = 1.0$  in  $\text{CHCl}_3$ ); >19:1 dr, 83% ee, determined by HPLC analysis [Daicel chiralpak AD-H, *n*-hexane/*i*-PrOH = 60/40, 1.0 mL/min,  $\lambda = 254$  nm,  $t$  (minor) = 29.25 min,  $t$  (major) = 8.58 min];  $^1\text{H}$  NMR (400 MHz,  $\text{DMSO}-d_6$ ):  $\delta$  9.14 (s, 1H), 8.00 (d,  $J = 1.8$  Hz, 1H), 7.94 – 7.88 (m, 2H), 7.66 – 7.52 (m, 4H), 7.47 (dd,  $J = 8.4, 1.9$  Hz, 1H), 7.22 – 7.17 (m, 2H), 7.16 – 7.11 (m, 3H), 6.44 (d,  $J = 1.9, 0.7$  Hz, 1H), 5.36 (qd,  $J = 14.8, 7.1$  Hz, 2H), 4.72 (ddd,  $J = 8.0, 5.9, 1.9$  Hz, 1H), 3.40 (d,  $J = 15.2$  Hz, 1H), 3.09 (d,  $J = 14.2$  Hz, 1H) ppm;  $^{13}\text{C}$  NMR (100 MHz,  $\text{DMSO}-d_6$ ):  $\delta$  167.72, 166.92, 139.74, 133.90, 132.90, 132.77, 132.18, 130.66, 130.14, 128.52, 127.85, 127.75, 127.07, 127.03, 123.08, 116.23, 115.33, 100.83, 72.65, 67.90, 40.67, 37.73 ppm; ESI-HRMS: calcd for  $\text{C}_{26}\text{H}_{20}\text{BrN}_3\text{O}_4 + \text{H}^+$  518.0710, found 518.0716.

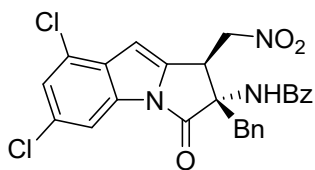

**Synthesis of 3f (procedure A):** (*E*)-4,6-dichloro-2-(2-nitrovinyl)-1*H*-indole **1f** (25.7 mg, 0.1 mmol), 4-benzyl-2-phenyloxazol-5(4*H*)-one **2a** (30.1 mg, 0.12 mmol), **C4** (6.3 mg, 10 mol%) were dissolved in xylene (1.0 mL) and stirred at 40 °C for 15 h. Upon workup, the reaction

mixture was removed to room temperature and added DABCO (2.7 mg, 30 mol%) for further cyclization during 6 h. After the reaction was completed, product **3f** was obtained by flash chromatography on silica gel (EtOAc/petroleum ether = 1/10) as a white solid (41.1 mg, 81% yield). M.p = 70-73 °C;  $[\alpha]_D^{20} = -11.6$  ( $c = 1.0$  in  $\text{CHCl}_3$ ); >19:1 dr, 83% ee, determined by HPLC analysis [Daicel chiralpak IB N-5, *n*-hexane/*i*-PrOH = 80/20, 1.0 mL/min,  $\lambda = 254$  nm,  $t$  (minor) = 40.93 min,  $t$  (major) = 36.58 min];  $^1\text{H}$  NMR (400 MHz,  $\text{DMSO}-d_6$ ):  $\delta$  9.20 (s, 1H), 7.92 (d, 2H), 7.85 (d,  $J = 1.8$  Hz, 1H), 7.63 (t,  $J = 7.3$  Hz, 1H), 7.59 – 7.52 (m, 3H), 7.23 – 7.17 (m, 2H), 7.16 – 7.10 (m, 3H), 6.50 (d,  $J = 2.0$  Hz, 1H), 5.47 (dd,  $J = 15.0, 7.8$  Hz, 1H), 5.34 (dd,  $J = 15.0, 6.0$  Hz, 1H), 4.85 – 4.74 (m, 1H), 3.41 (d,  $J = 14.3$  Hz, 1H), 3.12 (d,  $J = 14.1$  Hz, 1H) ppm;  $^{13}\text{C}$  NMR (100 MHz,  $\text{DMSO}-d_6$ ):  $\delta$  167.78, 167.00, 141.16, 133.75, 132.79, 132.21, 130.80, 130.52, 130.18, 128.75, 128.50, 127.84, 127.77, 127.07, 125.42, 123.73, 111.72, 98.65, 72.30, 68.03, 40.64, 37.54 ppm; ESI-HRMS: calcd for  $\text{C}_{26}\text{H}_{19}\text{Cl}_2\text{N}_3\text{O}_4 + \text{H}^+$  508.0825, found 508.0830.

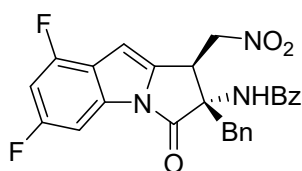

**Synthesis of 3g (procedure A):** (*E*)-4,6-difluoro-2-(2-nitrovinyl)-1*H*-indole **1g** (22.4 mg, 0.1 mmol), 4-benzyl-2-phenyloxazol-5(4*H*)-one **2a** (30.1 mg, 0.12 mmol), **C4** (6.3 mg, 10 mol%) were dissolved in xylene (1.0 mL) and stirred at 40 °C for 14 h. Upon workup, the reaction mixture

was removed to room temperature and added DABCO (2.7 mg, 30 mol%) for further cyclization during 6 h. After the reaction was completed, product **3g** was obtained by flash chromatography on silica gel (EtOAc/petroleum ether = 1/10) as a pale yellow solid (25.1 mg, 53% yield). M.p = 93-95 °C;  $[\alpha]_D^{20} = -13.2$  ( $c = 1.0$  in  $\text{CHCl}_3$ ); >19:1 dr, 75% ee, determined by HPLC analysis [Daicel chiralpak AD-H, *n*-hexane/*i*-PrOH = 60/40, 1.0 mL/min,  $\lambda = 254$  nm,  $t$  (minor) = 8.43 min,  $t$  (major) = 7.06 min];  $^1\text{H}$  NMR (400 MHz,  $\text{DMSO}-d_6$ ):  $\delta$  9.19 (s, 1H), 7.95 – 7.90 (m, 2H), 7.65 – 7.60 (m, 1H), 7.58 – 7.51 (m, 3H), 7.24 (td,  $J = 10.3, 2.2$  Hz, 1H), 7.20 – 7.15 (m, 2H), 7.14 – 7.09 (m, 3H), 6.47 (d,  $J = 1.9$  Hz, 1H), 5.42 (dd,  $J = 14.9, 7.7$  Hz, 1H), 5.34 (dd,  $J = 15.0, 6.1$  Hz, 1H), 4.80 – 4.73 (m, 1H), 3.40 (d,  $J = 14.3$  Hz, 1H), 3.14 (d,  $J = 14.2$  Hz, 1H) ppm;  $^{13}\text{C}$  NMR (100 MHz,  $\text{DMSO}-d_6$ ):  $\delta$  167.91, 166.96, 139.84, 139.81, 133.67, 132.85, 132.17, 131.23, 130.95, 130.09, 128.54, 128.49, 128.45, 127.88, 127.82, 127.77, 127.07, 96.01, 72.37, 68.17, 40.39, 37.67 ppm; ESI-HRMS: calcd for  $\text{C}_{26}\text{H}_{19}\text{F}_2\text{N}_3\text{O}_4 + \text{Na}^+$  498.1236, found 498.1240.

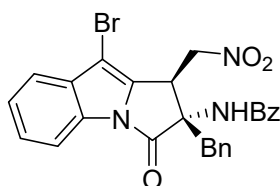

**Synthesis of 3h (procedure A):** (*E*)-3-bromo-2-(2-nitrovinyl)-1*H*-indole **1h** (26.7 mg, 0.1 mmol), 4-benzyl-2-phenyloxazol-5(4*H*)-one **2a** (30.1 mg, 0.12 mmol), **C4** (6.3 mg, 10 mol%) were dissolved in xylene (1.0 mL) and stirred at 40 °C for 17 h. Upon workup, the reaction mixture was removed

to room temperature and added DABCO (2.7 mg, 30 mol%) for further cyclization during 6 h. After the reaction was completed, product **3h** was obtained by flash chromatography on silica gel (EtOAc/petroleum ether = 1/10) as a pale yellow solid (41.9 mg, 81% yield). M.p = 168-171 °C;  $[\alpha]_D^{20} = -20.7$  ( $c = 1.0$  in  $\text{CHCl}_3$ ); >19:1 dr, 92% ee, determined by HPLC analysis [Daicel chiralpak AD-H, *n*-hexane/*i*-PrOH = 60/40, 1.0 mL/min,  $\lambda = 254$  nm,  $t$  (minor) = 15.70 min,  $t$  (major) = 7.25 min];  $^1\text{H}$  NMR (400 MHz,  $\text{DMSO}-d_6$ ):  $\delta$  9.21 (s, 1H), 7.98 – 7.91 (m, 3H), 7.66 – 7.61 (m, 1H), 7.56 (t,  $J = 7.4$  Hz, 2H), 7.50 – 7.39 (m, 3H), 7.16 (dd,  $J = 6.7, 2.9$  Hz, 2H), 7.09 – 7.02 (m, 3H), 5.47 (d,  $J = 6.6$  Hz, 2H), 4.94 (t,  $J = 6.5$  Hz, 1H), 3.42 (d, 1H), 3.24 (d,  $J = 14.2$  Hz, 1H) ppm;  $^{13}\text{C}$  NMR (100 MHz,  $\text{DMSO}-d_6$ ):  $\delta$  167.51, 167.08, 135.18, 133.50, 132.84, 132.23, 132.10, 129.87, 129.53, 128.52, 127.82, 127.76, 127.13, 125.54, 124.90, 119.01, 113.12, 89.97,

70.98, 68.52, 40.15, 37.91 ppm; ESI-HRMS: calcd for  $C_{26}H_{20}BrN_3O_4 + H^+$  518.0710, found 518.0708.

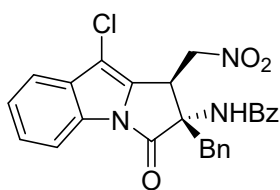

**Synthesis of 3i (procedure A):** (*E*)-3-chloro-2-(2-nitrovinyl)-1*H*-indole **1i**

(22.2 mg, 0.1 mmol), 4-benzyl-2-phenyloxazol-5(4*H*)-one **2a** (30.1 mg, 0.12 mmol), **C4** (6.3 mg, 10 mol%) were dissolved in xylene (1.0 mL) and stirred at 40 °C for 17 h. Upon workup, the reaction mixture was removed to room temperature and added DABCO (2.7 mg, 30 mol%) for further cyclization during 6 h. After the reaction was completed, product **3i** was obtained by flash chromatography on silica gel (EtOAc/petroleum ether = 1/10) as a pale yellow solid (34.5 mg, 78% yield). M.p = 143-148 °C;  $[\alpha]_D^{20} = +0.3$  ( $c = 1.0$  in  $CHCl_3$ ); >19:1 dr, 83% ee, determined by HPLC analysis [Daicel chiralpak AD-H, *n*-hexane/*i*-PrOH = 60/40, 1.0 mL/min,  $\lambda = 254$  nm,  $t$  (minor) = 15.25 min,  $t$  (major) = 6.55 min];  $^1H$  NMR (400 MHz, DMSO- $d_6$ ):  $\delta$  9.18 (s, 1H), 7.97 – 7.92 (m, 3H), 7.66 – 7.60 (m, 1H), 7.58 – 7.53 (m, 2H), 7.53 – 7.48 (m, 1H), 7.47 – 7.39 (m, 1H), 7.20 – 7.13 (m, 2H), 7.09 – 7.04 (m, 3H), 5.46 (d,  $J = 6.8$  Hz, 2H), 4.96 (t,  $J = 6.7$  Hz, 1H), 3.40 (d,  $J = 14.3$  Hz, 1H), 3.22 (d,  $J = 14.2$  Hz, 1H) ppm;  $^{13}C$  NMR (100 MHz, DMSO- $d_6$ ):  $\delta$  167.39, 167.04, 133.51, 133.14, 132.81, 132.17, 130.58, 129.87, 129.00, 128.46, 127.75, 127.72, 127.08, 125.52, 124.80, 118.08, 113.17, 103.79, 71.08, 68.39, 40.02, 37.81 ppm; ESI-HRMS: calcd for  $C_{26}H_{20}ClN_3O_4 + Na^+$  496.1035, found 496.1031.

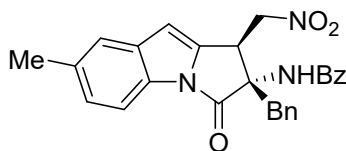

**Synthesis of 3j (procedure B):** (*E*)-5-methyl-2-(2-nitrovinyl)-1*H*-indole **1j**

(20.2 mg, 0.1 mmol), 4-benzyl-2-phenyloxazol-5(4*H*)-one **2a** (30.1 mg, 0.12 mmol), **C4** (6.3 mg, 10 mol%) were dissolved in xylene (1.0 mL) and stirred at 40 °C for 16 h. Upon workup, product **3j'** was obtained by flash chromatography on silica gel (EtOAc/petroleum ether = 1/20). Subsequently, **3j'** was dissolved in DCM (1.0 mL), then DABCO (2.7 mg, 30 mol%) was added to the reaction mixture and stirred at 0 °C for 12 h. After the reaction was completed, the residue was purified by flash chromatography on silica gel (EtOAc/petroleum ether = 1/10) to afford product **3j** as a yellow solid (37.1 mg, 82% yield). M.p = 73-76 °C;  $[\alpha]_D^{20} = -12.2$  ( $c = 1.0$  in  $CHCl_3$ ); >19:1 dr, 90% ee, determined by HPLC analysis [Daicel chiralpak IB N-5, *n*-hexane/*i*-PrOH = 70/30, 1.0 mL/min,  $\lambda = 254$  nm,  $t$  (minor) = 14.86 min,  $t$  (major) = 19.10 min];  $^1H$  NMR (400 MHz, DMSO- $d_6$ ):  $\delta$  9.06 (s, 1H), 7.91 (dt,  $J = 7.0$ , 1.4 Hz, 2H), 7.77 (d,  $J = 8.2$  Hz, 1H), 7.65 – 7.59 (m, 1H), 7.55 (dd,  $J = 8.1$ , 6.5 Hz, 2H), 7.38 (s,

1H), 7.19 – 7.13 (m, 3H), 7.11 (q,  $J = 3.2$  Hz, 3H), 6.30 (d,  $J = 1.8$  Hz, 1H), 5.34 (h,  $J = 8.3$  Hz, 2H), 4.72 (ddd,  $J = 8.1, 6.2, 1.9$  Hz, 1H), 3.40 (d,  $J = 14.2$  Hz, 1H), 3.06 (d,  $J = 14.2$  Hz, 1H), 2.41 (s, 3H) ppm;  $^{13}\text{C}$  NMR (100 MHz, DMSO- $d_6$ ):  $\delta$  167.52, 166.82, 139.04, 134.05, 133.89, 133.16, 133.08, 132.08, 130.06, 128.47, 128.32, 127.81, 127.72, 127.00, 125.08, 121.03, 112.48, 100.53, 72.83, 67.87, 40.58, 37.97, 21.24 ppm; ESI-HRMS: calcd for  $\text{C}_{27}\text{H}_{23}\text{N}_3\text{O}_4 + \text{Na}^+$  476.1581, found 476.1577.

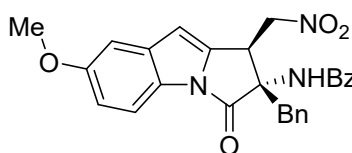

**Synthesis of 3k (procedure B):** (*E*)-5-methoxy-2-(2-nitrovinyl)-1*H*-indole **1k** (21.8 mg, 0.1 mmol), 4-benzyl-2-phenyloxazol-5(4*H*)-one **2a** (30.1 mg, 0.12 mmol), **C4** (6.3 mg, 10 mol%) were dissolved in

xylene (1.0 mL) and stirred at 40 °C for 24 h. Upon workup, product **3k'** was obtained by flash chromatography on silica gel (EtOAc/petroleum ether = 1/20). Subsequently, **3k'** was dissolved in DCM (1.0 mL), then DABCO (2.7 mg, 30 mol%) was added to the reaction mixture and stirred at 0 °C for 12 h. After the reaction was completed, the residue was purified by flash chromatography on silica gel (EtOAc/petroleum ether = 1/10) to afford product **3k** as a yellow solid (35.1 mg, 75% yield). M.p = 83-87 °C;  $[\alpha]_D^{20} = -10.8$  ( $c = 1.0$  in  $\text{CHCl}_3$ ); >19:1 dr, 96% ee, determined by HPLC analysis [Daicel chiralpak IB N-5, *n*-hexane/*i*-PrOH = 70/30, 1.0 mL/min,  $\lambda = 254$  nm,  $t$  (minor) = 13.00 min,  $t$  (major) = 26.02 min];  $^1\text{H}$  NMR (400 MHz, DMSO- $d_6$ ):  $\delta$  9.05 (s, 1H), 7.95 – 7.88 (m, 2H), 7.77 (d,  $J = 8.8$  Hz, 1H), 7.65 – 7.58 (m, 1H), 7.58 – 7.51 (m, 2H), 7.20 – 7.14 (m, 2H), 7.14 – 7.09 (m, 4H), 6.94 (dd,  $J = 8.8, 2.5$  Hz, 1H), 6.31 (d,  $J = 1.8$  Hz, 1H), 5.34 (h,  $J = 8.2$  Hz, 2H), 4.71 (ddd,  $J = 8.1, 6.1, 1.9$  Hz, 1H), 3.79 (s, 3H), 3.40 (d,  $J = 14.2$  Hz, 1H), 3.07 (d,  $J = 14.2$  Hz, 1H) ppm;  $^{13}\text{C}$  NMR (100 MHz, DMSO- $d_6$ ):  $\delta$  167.31, 166.81, 156.49, 139.71, 134.80, 134.04, 133.09, 132.07, 130.05, 128.46, 127.80, 127.71, 126.99, 124.71, 113.42, 112.22, 104.23, 100.80, 72.81, 67.76, 55.40, 40.59, 38.00 ppm; ESI-HRMS: calcd for  $\text{C}_{27}\text{H}_{23}\text{N}_3\text{O}_5 + \text{Na}^+$  492.1530, found 492.1537.

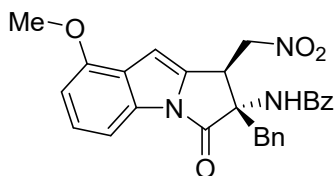

**Synthesis of 3l (procedure B):** (*E*)-4-methoxy-2-(2-nitrovinyl)-1*H*-indole **1l** (21.8 mg, 0.1 mmol), 4-benzyl-2-phenyloxazol-5(4*H*)-one **2a** (30.1 mg, 0.12 mmol), **C4** (6.3 mg, 10 mol%) were dissolved in xylene

(1.0 mL) and stirred at 40 °C for 20 h. Upon workup, product **3l'** was obtained by flash chromatography on silica gel (EtOAc/petroleum ether = 1/20). Subsequently, **3l'** was dissolved in DCM (1.0 mL), then DABCO (2.7 mg, 30 mol%) was added to the reaction mixture and stirred at 0

°C for 12 h. After the reaction was completed, the residue was purified by flash chromatography on silica gel (EtOAc/petroleum ether = 1/10) to afford product **3l** as a yellow solid (31.4 mg, 63% yield). M.p = 73-75 °C;  $[\alpha]_D^{20} = +2.8$  ( $c = 1.0$  in  $\text{CHCl}_3$ ); >19:1 dr, 77% ee, determined by HPLC analysis [Daicel chiralpak OD-H, *n*-hexane/*i*-PrOH = 60/40, 1.0 mL/min,  $\lambda = 254$  nm,  $t$  (minor) = 14.54 min,  $t$  (major) = 26.04 min];  $^1\text{H}$  NMR (400 MHz,  $\text{DMSO}-d_6$ ):  $\delta$  9.09 (s, 1H), 7.95 – 7.87 (m, 2H), 7.65 – 7.59 (m, 1H), 7.59 – 7.46 (m, 3H), 7.29 (t,  $J = 8.1$  Hz, 1H), 7.20 – 7.09 (m, 5H), 6.87 (d,  $J = 8.0$  Hz, 1H), 6.37 (d, 1H), 5.39 (dd,  $J = 14.6, 8.0$  Hz, 1H), 5.30 (dd,  $J = 14.6, 6.3$  Hz, 1H), 4.72 (ddd,  $J = 8.1, 6.3, 2.0$  Hz, 1H), 3.89 (s, 3H), 3.40 (d,  $J = 14.2$  Hz, 1H), 3.05 (d,  $J = 14.2$  Hz, 1H) ppm;  $^{13}\text{C}$  NMR (100 MHz,  $\text{DMSO}-d_6$ ):  $\delta$  167.83, 166.85, 152.33, 137.35, 134.07, 133.04, 132.10, 131.13, 130.10, 128.48, 127.81, 127.72, 126.99, 125.26, 123.00, 105.93, 105.12, 97.71, 72.77, 67.97, 55.43, 40.57, 37.84 ppm; ESI-HRMS: calcd for  $\text{C}_{27}\text{H}_{23}\text{N}_3\text{O}_5 + \text{Na}^+$  492.1530, found 492.1526.

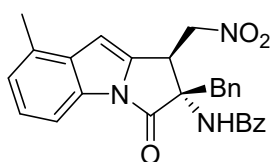

**Synthesis of 3m (procedure B):** (*E*)-4-methyl-2-(2-nitrovinyl)-1*H*-indole

**1m** (20.2 mg, 0.1 mmol), 4-benzyl-2-phenyloxazol-5(4*H*)-one **2a** (30.1 mg, 0.12 mmol), **C4** (6.3 mg, 10 mol%) were dissolved in xylene (1.0 mL) and

stirred at 40 °C for 16 h. Upon workup, product **3m** was obtained by flash chromatography on silica gel (EtOAc/petroleum ether = 1/20). Subsequently, **3m'** was dissolved in DCM (1.0 mL), then DABCO (2.7 mg, 30 mol%) was added to the reaction mixture and stirred at 0 °C for 12 h. After the reaction was completed, the residue was purified by flash chromatography on silica gel (EtOAc/petroleum ether = 1/10) to afford product **3m** as a yellow solid (34.7 mg, 73% yield). M.p = 88-93 °C;  $[\alpha]_D^{20} = -12.2$  ( $c = 1.0$  in  $\text{CHCl}_3$ ); >19:1 dr, 77% ee, determined by HPLC analysis [Daicel chiralpak IB N-5, *n*-hexane/*i*-PrOH = 70/30, 1.0 mL/min,  $\lambda = 254$  nm,  $t$  (minor) = 16.83 min,  $t$  (major) = 14.73 min];  $^1\text{H}$  NMR (400 MHz,  $\text{DMSO}-d_6$ ):  $\delta$  9.06 (s, 1H), 7.91 (dt,  $J = 7.2, 1.4$  Hz, 2H), 7.72 (d,  $J = 8.0$  Hz, 1H), 7.65 – 7.59 (m, 1H), 7.58 – 7.52 (m, 2H), 7.24 (t,  $J = 7.7$  Hz, 1H), 7.20 – 7.15 (m, 2H), 7.15 – 7.09 (m, 4H), 6.44 (d,  $J = 2.1$  Hz, 1H), 5.41 – 5.29 (m, 2H), 4.75 (td,  $J = 6.1, 3.1$  Hz, 1H), 3.42 (d,  $J = 14.2$  Hz, 1H), 3.05 (d,  $J = 14.2$  Hz, 1H), 2.45 (s, 3H) ppm;  $^{13}\text{C}$  NMR (100 MHz,  $\text{DMSO}-d_6$ ):  $\delta$  167.66, 166.84, 138.40, 134.13, 133.09, 133.06, 132.07, 130.16, 130.11, 129.84, 128.46, 127.79, 127.70, 126.95, 124.44, 123.97, 110.42, 99.31, 72.84, 67.85, 40.68, 37.87, 18.20 ppm; ESI-HRMS: calcd for  $\text{C}_{27}\text{H}_{25}\text{N}_3\text{O}_4 + \text{Na}^+$  476.1581, found 476.1590.

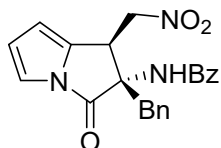

**Synthesis of 3n (procedure B):** (*E*)-2-(2-nitrovinyl)-1*H*-pyrrole **1n** (13.8 mg,

0.1 mmol), 4-benzyl-2-phenyloxazol-5(4*H*)-one **2a** (30.1 mg, 0.12 mmol), **C4** (6.3 mg, 10 mol%) were dissolved in xylene (1.0 mL) and stirred at 40 °C for 13 h. Upon workup, product **3n'** was obtained by flash chromatography on silica gel (EtOAc/petroleum ether = 1/20). Subsequently, **3n'** was dissolved in DCM (1.0 mL), then DABCO (2.7 mg, 30 mol%) was added to the reaction mixture and stirred at 0 °C for 12 h. After the reaction was completed, the residue was purified by flash chromatography on silica gel (EtOAc/petroleum ether = 1/10) to afford product **3n** as a yellow solid (35.7 mg, 92% yield). M.p = 90-93 °C;  $[\alpha]_{\text{D}}^{20} = -7.7$  ( $c = 1.0$  in  $\text{CHCl}_3$ ); >19:1 dr, 57% ee, determined by HPLC analysis [Daicel chiralpak IB N-5, *n*-hexane/*i*-PrOH = 70/30, 1.0 mL/min,  $\lambda = 254$  nm,  $t$  (minor) = 10.07 min,  $t$  (major) = 7.67 min];  $^1\text{H}$  NMR (400 MHz,  $\text{DMSO}-d_6$ ):  $\delta$  9.01 (s, 1H), 7.92 – 7.80 (m, 2H), 7.57 – 7.47 (m, 3H), 7.21 – 7.16 (m, 5H), 7.07 (dd,  $J = 3.2, 1.1$  Hz, 1H), 6.30 (t,  $J = 3.1$  Hz, 1H), 5.75 (dd,  $J = 3.1, 1.5$  Hz, 1H), 4.98 (dd,  $J = 14.9, 5.9$  Hz, 1H), 4.63 (dd,  $J = 15.0, 9.2$  Hz, 1H), 4.30 (ddd,  $J = 9.4, 5.8, 1.3$  Hz, 1H), 3.38 (d,  $J = 6.1$  Hz, 2H) ppm;  $^{13}\text{C}$  NMR (100 MHz,  $\text{DMSO}-d_6$ ):  $\delta$  169.81, 168.03, 134.34, 133.11, 132.48, 132.09, 129.94, 128.34, 127.77, 127.64, 127.49, 118.55, 111.79, 104.76, 74.08, 67.92, 42.52, 38.41 ppm; ESI-HRMS: calcd for  $\text{C}_{22}\text{H}_{19}\text{N}_3\text{O}_4 + \text{Na}^+$  412.1268, found 412.1264.

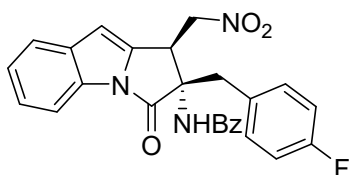

**Synthesis of 3o (procedure B):** (*E*)-2-(2-nitrovinyl)-1*H*-indole **1a**

(18.8 mg, 0.1 mmol), 4-(4-fluorobenzyl)-2-phenyloxazol-5(4*H*)-one **2b** (32.2 mg, 0.12 mmol), **C4** (6.3 mg, 10 mol%) were dissolved in xylene (1.0 mL) and stirred at 40 °C for 13 h. Upon workup, product **3o'** was obtained by flash chromatography on silica gel (EtOAc/petroleum ether = 1/20). Subsequently, **3o'** was dissolved in DCM (1.0 mL), then DABCO (2.7 mg, 30 mol%) was added to the reaction mixture and stirred at 0 °C for 12 h. After the reaction was completed, the residue was purified by flash chromatography on silica gel (EtOAc/petroleum ether = 1/10) to afford product **3o** as a yellow solid (33.3 mg, 73% yield). M.p = 91-99 °C;  $[\alpha]_{\text{D}}^{20} = +12.0$  ( $c = 1.0$  in  $\text{CHCl}_3$ ); >19:1 dr, 60% ee, determined by HPLC analysis [Daicel chiralpak AD-H, *n*-hexane/*i*-PrOH = 60/40, 1.0 mL/min,  $\lambda = 254$  nm,  $t$  (minor) = 8.13 min,  $t$  (major) = 8.99 min];  $^1\text{H}$  NMR (400 MHz,  $\text{DMSO}-d_6$ ):  $\delta$  9.11 (s, 1H), 7.93 – 7.86 (m, 3H), 7.65 – 7.60 (m, 2H), 7.58 – 7.53 (m, 2H), 7.38 – 7.28 (m, 2H), 7.23 (s, 4H), 6.47 (dd,  $J = 1.9, 0.7$  Hz, 1H), 5.41 (dd,  $J = 14.7, 8.1$  Hz, 1H), 5.30 (dd,  $J = 14.8, 6.1$  Hz, 1H), 4.73 (ddd,  $J = 8.1, 6.1, 1.9$  Hz, 1H), 3.39 (d,  $J = 14.2$  Hz, 1H), 3.04 (d,  $J = 14.1$  Hz, 1H) ppm;  $^{13}\text{C}$  NMR (100 MHz,  $\text{DMSO}-d_6$ ):  $\delta$  167.15, 166.97, 138.81, 133.63, 133.45, 133.01, 132.12, 132.07, 131.75, 130.09,

128.49, 127.71, 127.692, 124.14, 123.94, 121.22, 112.91, 101.07, 72.75, 67.64, 40.82, 36.78 ppm; ESI-HRMS: calcd for  $C_{26}H_{20}FN_3O_4 + K^+$  496.1069, found 496.1070.

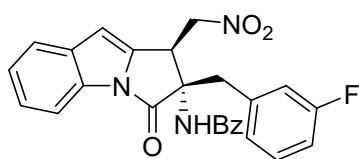

**Synthesis of 3p (procedure B):** (*E*)-2-(2-nitrovinyl)-1*H*-indole **1a**

(18.8 mg, 0.1 mmol), 4-(3-fluorobenzyl)-2-phenyloxazol-5(4*H*)-one

**2c** (32.2 mg, 0.12 mmol), **C4** (6.3 mg, 10 mol%) were dissolved in

xylylene (1.0 mL) and stirred at 40 °C for 16 h. Upon workup, product **3p'** was obtained by flash chromatography on silica gel (EtOAc/petroleum ether = 1/20). Subsequently, **3p'** was dissolved in DCM (1.0 mL), then DABCO (2.7 mg, 30 mol%) was added to the reaction mixture and stirred at 0 °C for 12 h. After the reaction was completed, the residue was purified by flash chromatography on silica gel (EtOAc/petroleum ether = 1/10) to afford product **3p** as a yellow solid (35.1 mg, 77% yield). M.p = 102-105 °C;  $[\alpha]_D^{20} = -7.8$  ( $c = 1.0$  in  $CHCl_3$ ); >19:1 dr, 91% ee, determined by HPLC analysis [Daicel chiralpak IB N-5, *n*-hexane/*i*-PrOH = 60/40, 1.0 mL/min,  $\lambda = 254$  nm,  $t$  (minor) = 10.12 min,  $t$  (major) = 14.09 min];  $^1H$  NMR (400 MHz, DMSO- $d_6$ ):  $\delta$  9.15 (s, 1H), 7.94 – 7.86 (m, 3H), 7.66 – 7.60 (m, 2H), 7.59 – 7.52 (m, 2H), 7.32 (pd,  $J = 7.3, 1.5$  Hz, 2H), 7.19 (td,  $J = 8.0, 6.3$  Hz, 1H), 7.11 – 6.93 (m, 3H), 6.46 (d,  $J = 1.8$  Hz, 1H), 5.41 (dd,  $J = 14.7, 8.1$  Hz, 1H), 5.31 (dd,  $J = 14.7, 6.2$  Hz, 1H), 4.75 (ddd,  $J = 8.1, 6.2, 1.9$  Hz, 1H), 3.41 (d,  $J = 14.8$  Hz, 1H), 3.10 (d,  $J = 14.1$  Hz, 1H) ppm;  $^{13}C$  NMR (100 MHz, DMSO- $d_6$ ):  $\delta$  167.30, 166.96, 138.80, 137.12, 133.63, 133.01, 132.14, 130.11, 129.59, 128.51, 127.71, 126.53, 124.15, 123.96, 121.23, 116.98, 113.90, 112.87, 101.01, 72.76, 67.76, 40.75, 37.14 ppm; ESI-HRMS: calcd for  $C_{26}H_{20}FN_3O_4 + H^+$  458.1511, found 458.1543.

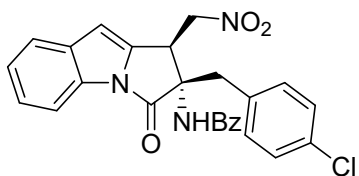

**Synthesis of 3q (procedure B):** (*E*)-2-(2-nitrovinyl)-1*H*-indole **1a**

(18.8 mg, 0.1 mmol), 4-(4-chlorobenzyl)-2-phenyloxazol-5(4*H*)-one

**2d** (34.2 mg, 0.12 mmol), **C4** (6.3 mg, 10 mol%) were dissolved in

xylylene (1.0 mL) and stirred at 40 °C for 19 h. Upon workup, product **3q'** was obtained by flash chromatography on silica gel (EtOAc/petroleum ether = 1/20). Subsequently, **3q'** was dissolved in DCM (1.0 mL), then DABCO (2.7 mg, 30 mol%) was added to the reaction mixture and stirred at 0 °C for 12 h. After the reaction was completed, the residue was purified by flash chromatography on silica gel (EtOAc/petroleum ether = 1/10) to afford product **3q** as a yellow solid (34.5 mg, 73% yield). M.p = 95-96 °C;  $[\alpha]_D^{20} = -7.3$  ( $c = 1.0$  in  $CHCl_3$ ); >19:1 dr, 92% ee, determined by HPLC analysis [Daicel chiralpak IB N-5, *n*-hexane/*i*-PrOH = 70/30, 1.0 mL/min,  $\lambda = 254$  nm,  $t$  (minor) =

14.19 min, t (major) = 20.96 min];  $^1\text{H}$  NMR (400 MHz,  $\text{DMSO-}d_6$ ):  $\delta$  9.10 (s, 1H), 7.95 – 7.85 (m, 3H), 7.65 – 7.60 (m, 2H), 7.55 (dd,  $J$  = 8.2, 6.6 Hz, 2H), 7.37 – 7.28 (m, 2H), 7.26 – 7.20 (m, 2H), 7.01 – 6.93 (m, 2H), 6.45 (d,  $J$  = 1.9 Hz, 1H), 5.41 (dd,  $J$  = 14.7, 8.1 Hz, 1H), 5.31 (dd,  $J$  = 14.7, 6.1 Hz, 1H), 4.74 (ddd,  $J$  = 8.1, 6.0, 1.9 Hz, 1H), 3.38 (d,  $J$  = 14.3 Hz, 1H), 3.06 (d,  $J$  = 14.2 Hz, 1H) ppm;  $^{13}\text{C}$  NMR (100 MHz,  $\text{DMSO-}d_6$ ):  $\delta$  167.35, 166.94, 138.87, 133.61, 133.03, 132.12, 132.04, 130.42, 130.10, 128.48, 127.71, 124.11, 123.92, 121.20, 114.60, 114.38, 112.88, 100.94, 72.77, 67.74, 40.69, 36.73 ppm; ESI-HRMS: calcd for  $\text{C}_{26}\text{H}_{20}\text{ClN}_3\text{O}_4 + \text{Na}^+$  496.1035, found 496.1040.

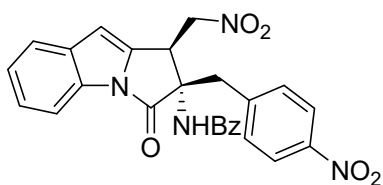

**Synthesis of 3r (procedure B):** (*E*)-2-(2-nitrovinyl)-1*H*-indole **1a**

(18.8 mg, 0.1 mmol), 4-(4-nitrobenzyl)-2-phenyloxazol-5(4*H*)-one **2e** (35.5 mg, 0.12 mmol), **C4** (6.3 mg, 10 mol%) were dissolved in xylene (1.0 mL) and stirred at 40 °C for 20 h. Upon workup, product **3q'** was obtained by flash chromatography on silica gel (EtOAc/petroleum ether = 1/20). Subsequently, **3r'** was dissolved in DCM (1.0 mL), then DABCO (2.7 mg, 30 mol%) was added to the reaction mixture and stirred at 0 °C for 12 h. After the reaction was completed, the residue was purified by flash chromatography on silica gel (EtOAc/petroleum ether = 1/10) to afford product **3r** as a yellow solid (39.2 mg, 81% yield). M.p = 87-90 °C;  $[\alpha]_D^{20}$  = +27.4 ( $c$  = 1.0 in  $\text{CHCl}_3$ ); >19:1 dr, 91% ee, determined by HPLC analysis [Daicel chiralpak IB N-5, *n*-hexane/*i*-PrOH = 60/40, 1.0 mL/min,  $\lambda$  = 254 nm, t (minor) = 29.16 min, t (major) = 11.48 min];  $^1\text{H}$  NMR (400 MHz,  $\text{DMSO-}d_6$ ):  $\delta$  9.24 (s, 1H), 8.08 – 8.04 (m, 2H), 7.94 – 7.90 (m, 1H), 7.84 (d,  $J$  = 1.5 Hz, 1H), 7.58 – 7.50 (m, 7H), 7.37 – 7.31 (m, 2H), 6.30 (d,  $J$  = 1.3 Hz, 1H), 5.17 (dd,  $J$  = 15.1, 5.9 Hz, 1H), 4.74 (dd,  $J$  = 8.5, 6.8 Hz, 1H), 4.48 (ddd,  $J$  = 9.0, 5.9, 1.6 Hz, 1H), 3.64 – 3.52 (m, 2H) ppm;  $^{13}\text{C}$  NMR (100 MHz,  $\text{DMSO-}d_6$ ):  $\delta$  169.08, 167.14, 146.88, 141.56, 138.87, 134.00, 132.96, 132.29, 131.73, 129.88, 128.46, 127.87, 124.38, 123.89, 123.38, 121.23, 113.10, 101.06, 73.88, 67.97, 41.80, 38.64 ppm; ESI-HRMS: calcd for  $\text{C}_{26}\text{H}_{20}\text{N}_4\text{O}_6 + \text{Na}^+$  507.1275, found 507.1274.

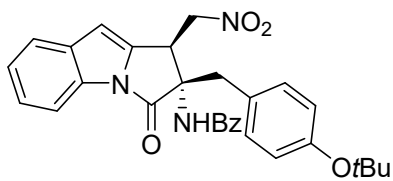

**Synthesis of 3s (procedure B):** (*E*)-2-(2-nitrovinyl)-1*H*-indole **1a**

(18.8 mg, 0.1 mmol), 4-(4-(*tert*-butoxy)benzyl)-2-phenyloxazol-5(4*H*)-one **2f** (38.7 mg, 0.12 mmol), **C4** (6.3 mg, 10 mol%) were dissolved in xylene (1.0 mL) and stirred at 40 °C for 20 h. Upon workup, product **3s'** was obtained by flash chromatography on silica gel (EtOAc/petroleum ether =

1/20). Subsequently, **3s'** was dissolved in DCM (1.0 mL), then DABCO (2.7 mg, 30 mol%) was added to the reaction mixture and stirred at 0 °C for 12 h. After the reaction was completed, the residue was purified by flash chromatography on silica gel (EtOAc/petroleum ether = 1/10) to afford product **3s** as a yellow solid (38.3 mg, 75% yield). M.p = 87-90 °C;  $[\alpha]_{\text{D}}^{20} = -36.8$  ( $c = 1.0$  in  $\text{CHCl}_3$ ); >19:1 dr, 92% ee, determined by HPLC analysis [Daicel chiralpak IB N-5, *n*-hexane/*i*-PrOH = 60/40, 1.0 mL/min,  $\lambda = 254$  nm,  $t$  (minor) = 10.40 min,  $t$  (major) = 19.95 min];  $^1\text{H}$  NMR (400 MHz,  $\text{DMSO}-d_6$ ):  $\delta$  9.09 (s, 1H), 7.95 – 7.91 (m, 2H), 7.87 (d,  $J = 7.9, 1.1$  Hz, 1H), 7.65 – 7.60 (m, 1H), 7.57 – 7.48 (m, 3H), 7.27 (dtd,  $J = 26.5, 7.4, 1.2$  Hz, 2H), 7.07 – 6.98 (m, 2H), 6.61 – 6.53 (m, 2H), 6.26 (d,  $J = 1.9, 0.7$  Hz, 1H), 5.37 (d,  $J = 7.0$  Hz, 2H), 4.77 (td,  $J = 6.9, 2.0$  Hz, 1H), 3.30 (d,  $J = 14.3$  Hz, 1H), 3.19 (d,  $J = 14.3$  Hz, 1H) ppm;  $^{13}\text{C}$  NMR (100 MHz,  $\text{DMSO}-d_6$ ):  $\delta$  168.43, 166.80, 153.92, 139.02, 133.53, 133.09, 132.06, 130.37, 130.09, 128.44, 127.96, 127.78, 123.96, 123.81, 123.13, 121.07, 112.73, 100.21, 77.72, 72.81, 68.46, 39.82, 39.73, 37.51, 28.30 ppm; ESI-HRMS: calcd for  $\text{C}_{30}\text{H}_{29}\text{N}_3\text{O}_5 + \text{H}^+$  512.2180, found 512.2184.

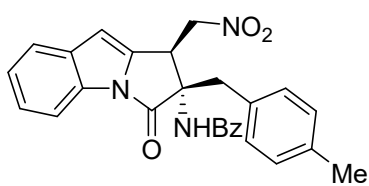

**Synthesis of 3t (procedure B):** (*E*)-2-(2-nitrovinyl)-1*H*-indole **1a** (18.8 mg, 0.1 mmol), 4-(4-methylbenzyl)-2-phenyloxazol-5(4*H*)-one **2g** (31.8 mg, 0.12 mmol), **C4** (6.3 mg, 10 mol%) were dissolved in xylene (1.0 mL) and stirred at 40 °C for 20 h. Upon workup, product

**3t'** was obtained by flash chromatography on silica gel (EtOAc/petroleum ether = 1/20). Subsequently, **3t'** was dissolved in DCM (1.0 mL), then DABCO (2.7 mg, 30 mol%) was added to the reaction mixture and stirred at 0 °C for 12 h. After the reaction was completed, the residue was purified by flash chromatography on silica gel (EtOAc/petroleum ether = 1/10) to afford product **3t** as a yellow solid (37.6 mg, 83% yield). M.p = 88-96 °C;  $[\alpha]_{\text{D}}^{20} = -11.8$  ( $c = 1.0$  in  $\text{CHCl}_3$ ); >19:1 dr, 90% ee, determined by HPLC analysis [Daicel chiralpak IB N-5, *n*-hexane/*i*-PrOH = 60/40, 1.0 mL/min,  $\lambda = 254$  nm,  $t$  (minor) = 10.80 min,  $t$  (major) = 12.39 min];  $^1\text{H}$  NMR (400 MHz,  $\text{DMSO}-d_6$ ):  $\delta$  9.04 (s, 1H), 7.94 – 7.87 (m, 3H), 7.66 – 7.58 (m, 2H), 7.58 – 7.51 (m, 2H), 7.38 – 7.27 (m, 2H), 7.08 – 7.02 (m, 2H), 6.92 (d,  $J = 7.9$  Hz, 2H), 6.40 (d, 1H), 5.33 (qd, 2H), 4.73 (ddd,  $J = 8.1, 6.1, 1.9$  Hz, 1H), 3.38 (s, 1H), 3.02 (d,  $J = 14.3$  Hz, 1H), 2.15 (s, 3H) ppm;  $^{13}\text{C}$  NMR (100 MHz,  $\text{DMSO}-d_6$ ):  $\delta$  167.76, 166.83, 138.99, 136.05, 133.64, 133.06, 132.09, 130.93, 130.11, 129.95, 128.48, 128.43, 127.72, 124.08, 123.90, 121.19, 112.87, 100.80, 72.84, 67.84, 40.61, 37.57, 20.55 ppm; ESI-HRMS: calcd for  $\text{C}_{27}\text{H}_{23}\text{N}_3\text{O}_4 + \text{Na}^+$  476.1581, found 476.1583.

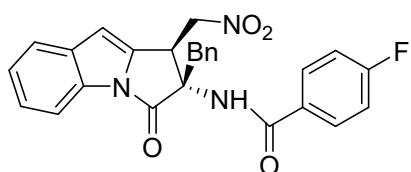

**Synthesis of 3u (procedure A):** (*E*)-2-(2-nitrovinyl)-1*H*-indole **1a** (18.8 mg, 0.1 mmol), 4-benzyl-2-(4-fluorophenyl)oxazol-5(4*H*)-one **2h** (32.2 mg, 0.12 mmol), **C4** (6.3 mg, 10 mol%) were

dissolved in xylene (1.0 mL) and stirred at 40 °C for 16 h. Upon workup, the reaction mixture was removed to room temperature added DABCO (2.7 mg, 30 mol%) for further cyclization during 5 h. After the reaction was completed, product **3u** was obtained by flash chromatography on silica gel (EtOAc/petroleum ether = 1/10) as a white solid (37.9 mg, 83% yield). M.p = 95-100 °C;  $[\alpha]_D^{20} = -19.7$  ( $c = 1.0$  in  $\text{CHCl}_3$ ); >19:1 dr, 90% ee, determined by HPLC analysis [Daicel chiralpak AD-H, *n*-hexane/*i*-PrOH = 60/40, 1.0 mL/min,  $\lambda = 254$  nm,  $t$  (minor) = 22.29 min,  $t$  (major) = 7.49 min];  $^1\text{H}$  NMR (400 MHz,  $\text{DMSO}-d_6$ ):  $\delta$  9.12 (s, 1H), 8.03 – 7.97 (m, 2H), 7.89 (dd,  $J = 7.9, 1.4$  Hz, 1H), 7.59 (dd,  $J = 7.2, 1.5$  Hz, 1H), 7.44 – 7.37 (m, 2H), 7.36 – 7.26 (m, 2H), 7.20 – 7.14 (m, 2H), 7.12 – 7.07 (m, 3H), 6.39 (d,  $J = 1.9$  Hz, 1H), 5.35 (dq, 2H), 4.74 (ddd,  $J = 8.1, 6.1, 1.9$  Hz, 1H), 3.40 (d,  $J = 14.3$  Hz, 1H), 3.08 (d,  $J = 14.2$  Hz, 1H) ppm;  $^{13}\text{C}$  NMR (100 MHz,  $\text{DMSO}-d_6$ ):  $\delta$  167.68, 165.80, 138.91, 133.97, 133.61, 130.54, 130.45, 130.06, 129.57, 127.79, 127.00, 124.09, 123.90, 121.19, 115.60, 115.38, 112.84, 100.81, 72.78, 67.97, 40.52, 37.92 ppm; ESI-HRMS: calcd for  $\text{C}_{26}\text{H}_{20}\text{FN}_3\text{O}_4 + \text{Na}^+$  480.1330, found 480.1327.

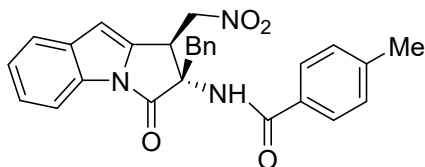

**Synthesis of 3v (procedure A):** (*E*)-2-(2-nitrovinyl)-1*H*-indole **1a** (18.8 mg, 0.1 mmol), 4-benzyl-2-(*p*-tolyl)oxazol-5(4*H*)-one **2i** (31.8 mg, 0.12 mmol), **C4** (6.3 mg, 10 mol%) were dissolved

in xylene (1.0 mL) and stirred at 40 °C for 16 h. Upon workup, the reaction mixture was removed to room temperature and added DABCO (2.7 mg, 30 mol%) for further cyclization during 5 h. After the reaction was completed, product **3v** was obtained by flash chromatography on silica gel (EtOAc/petroleum ether = 1/10) as a white solid (35.7 mg, 79% yield). M.p = 85-88 °C;  $[\alpha]_D^{20} = -23.9$  ( $c = 1.0$  in  $\text{CHCl}_3$ ); >19:1 dr, 92% ee, determined by HPLC analysis [Daicel chiralpak AD-H, *n*-hexane/*i*-PrOH = 60/40, 1.0 mL/min,  $\lambda = 254$  nm,  $t$  (minor) = 30.16 min,  $t$  (major) = 11.72 min];  $^1\text{H}$  NMR (400 MHz,  $\text{DMSO}-d_6$ ):  $\delta$  8.98 (s, 1H), 7.89 (d,  $J = 7.7, 1.3$  Hz, 1H), 7.82 (d, 2H), 7.59 (d, 1H), 7.39 – 7.25 (m, 4H), 7.19 – 7.14 (m, 2H), 7.13 – 7.07 (m, 3H), 6.38 (d, 1H), 5.35 (dq,  $J = 8.3$  Hz, 2H), 4.72 (ddd,  $J = 8.0, 6.1, 1.9$  Hz, 1H), 3.40 (d,  $J = 14.2$  Hz, 1H), 3.07 (d,  $J = 14.2$  Hz, 1H), 2.39 (s, 3H) ppm;  $^{13}\text{C}$  NMR (100 MHz,  $\text{DMSO}-d_6$ ):  $\delta$  167.79, 166.68, 142.16, 138.95, 134.04, 133.60, 130.23, 130.11, 130.08, 128.99, 127.78, 127.74, 126.98, 124.06, 123.88, 121.18, 112.84,

100.70, 72.86, 67.87, 40.66, 37.90, 21.06 ppm; ESI-HRMS: calcd for  $C_{27}H_{23}N_3O_4 + Na^+$  476.1581, found 476.1574.

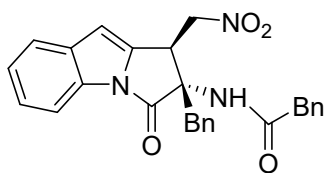

**Synthesis of 3w (procedure B):** (*E*)-2-(2-nitrovinyl)-1*H*-indole **1a** (18.8 mg, 0.1 mmol), 2,4-dibenzylloxazol-5(4*H*)-one **2j** (31.8 mg, 0.12 mmol), **C4** (6.3 mg, 10 mol%) were dissolved in xylene (1.0 mL) and stirred at 40 °C for 16 h. Upon workup, product **3w'** was obtained by

flash chromatography on silica gel (EtOAc/petroleum ether = 1/20). Subsequently, **3w'** was dissolved in DCM (1.0 mL), then DABCO (2.7 mg, 30 mol%) was added to the reaction mixture and stirred at 0 °C for 12 h. After the reaction was completed, the residue was purified by flash chromatography on silica gel (EtOAc/petroleum ether = 1/10) to afford product **3w** as a yellow solid (28.5 mg, 63% yield). M.p = 84-88 °C;  $[\alpha]_D^{20} = +2.1$  ( $c = 1.0$  in  $CHCl_3$ ); >19:1 dr, 91% ee, determined by HPLC analysis [Daicel chiralpak IB N-5, *n*-hexane/*i*-PrOH = 60/40, 1.0 mL/min,  $\lambda = 254$  nm,  $t$  (minor) = 5.99 min,  $t$  (major) = 7.69 min];  $^1H$  NMR (400 MHz,  $DMSO-d_6$ ):  $\delta$  8.94 (s, 1H), 7.84 (d,  $J = 7.8$ , 1.3 Hz, 1H), 7.54 (d,  $J = 7.1$ , 1.5 Hz, 1H), 7.33 – 7.20 (m, 8H), 7.12 – 7.02 (m, 5H), 6.31 (d,  $J = 1.8$  Hz, 1H), 5.31 (d, 2H), 4.57 (td,  $J = 7.1$ , 1.9 Hz, 1H), 3.60 (s, 2H), 3.21 (d,  $J = 14.3$  Hz, 1H), 3.06 (d,  $J = 14.2$  Hz, 1H) ppm;  $^{13}C$  NMR (100 MHz,  $DMSO-d_6$ ):  $\delta$  170.87, 167.94, 138.82, 135.56, 133.64, 133.59, 129.98, 129.91, 129.09, 128.22, 127.77, 127.02, 126.49, 124.07, 123.85, 121.13, 112.78, 100.56, 72.90, 67.60, 41.36, 40.50, 37.98 ppm; ESI-HRMS: calcd for  $C_{27}H_{23}N_3O_4 + H^+$  454.1761, found 454.1760.

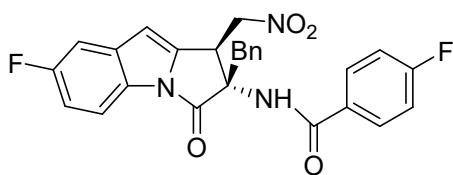

**Synthesis of 3x (procedure A):** (*E*)-5-fluoro-2-(2-nitrovinyl)-1*H*-indole **1d** (20.6 mg, 0.1 mmol), 4-benzyl-2-(4-fluorophenyl)oxazol-5(4*H*)-one **2h** (32.2 mg, 0.12 mmol), **C4**

(6.3 mg, 10 mol%) were dissolved in xylene (1.0 mL) and stirred at 40 °C for 16 h. Upon workup, the reaction mixture was removed to room temperature and added DABCO (2.7 mg, 30 mol%) for further cyclization during 5 h. After the reaction was completed, product **3x** was obtained by flash chromatography on silica gel (EtOAc/petroleum ether = 1/10) as a white solid (36.1 mg, 76% yield). M.p = 91-93 °C;  $[\alpha]_D^{20} = -13.8$  ( $c = 1.0$  in  $CHCl_3$ ); >19:1 dr, 90% ee, determined by HPLC analysis [Daicel chiralpak AD-H, *n*-hexane/*i*-PrOH = 60/40, 1.0 mL/min,  $\lambda = 254$  nm,  $t$  (minor) = 27.04 min,  $t$  (major) = 8.23 min];  $^1H$  NMR (400 MHz,  $DMSO-d_6$ ):  $\delta$  9.12 (s, 1H), 8.04 – 7.93 (m, 2H), 7.87 (dd,  $J = 8.8$ , 4.6 Hz, 1H), 7.46 – 7.36 (m, 3H), 7.21 – 7.13 (m, 3H), 7.12 – 7.07 (m, 3H), 6.39 (d,  $J = 1.9$

Hz, 1H), 5.35 (qd,  $J = 14.7, 7.0$  Hz, 2H), 4.72 (ddd,  $J = 8.0, 6.0, 1.9$  Hz, 1H), 3.38 (d,  $J = 14.2$  Hz, 1H), 3.10 (d,  $J = 14.2$  Hz, 1H) ppm;  $^{13}\text{C}$  NMR (100 MHz, DMSO- $d_6$ ):  $\delta$  167.51, 165.79, 140.87, 134.85, 133.78, 130.50, 130.42, 129.98, 129.48, 127.75, 127.00, 126.64, 115.55, 115.34, 113.88, 111.64, 107.09, 100.83, 72.61, 67.88, 40.47, 37.85 ppm; ESI-HRMS: calcd for  $\text{C}_{26}\text{H}_{19}\text{F}_2\text{N}_3\text{O}_4 + \text{Na}^+$  498.1236, found 498.1243.

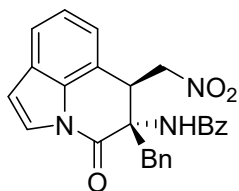

**Synthesis of 5a (procedure C):** (*E*)-7-(2-nitrovinyl)-1*H*-indole **4a** (18.8 mg, 0.1 mmol), 4-benzyl-2-phenyloxazol-5(4*H*)-one **2a** (30.1 mg, 0.12 mmol), **C4** (6.3 mg, 10 mol%) were dissolved in xylene (1.0 mL) and stirred at 40 °C for 12 h. After full-conversion, the residue was purified by flash chromatography

(EtOAc/petroleum ether = 1/20) to afford the pure chiral product **5a'**. Subsequently, the obtained **5a'** was dissolved in DCM (1.0 mL), then DBU (2.7 mg, 30 mol%) was added to the reaction mixture and stirred at 0 °C for 2 h. After the reaction was completed, the residue was purified by flash chromatography (EtOAc/petroleum ether = 1/10) to afford the pure chiral product **5a** as a pale yellow solid (31.6 mg, 72% yield). M.p = 86-88 °C;  $[\alpha]_{\text{D}}^{20} = +20.6$  ( $c = 1.0$  in  $\text{CHCl}_3$ ); >19:1 dr, 77% ee, determined by HPLC analysis [Daicel chiralpak AD-H, *n*-hexane/*i*-PrOH = 60/40, 1.0 mL/min,  $\lambda = 254$  nm,  $t$  (minor) = 21.35 min,  $t$  (major) = 10.35 min];  $^1\text{H}$  NMR (400 MHz, DMSO- $d_6$ ):  $\delta$  8.94 (s, 1H), 7.94 – 7.89 (m, 2H), 7.67 (d,  $J = 3.6$  Hz, 1H), 7.64 – 7.58 (m, 1H), 7.54 (dd,  $J = 8.2, 6.6$  Hz, 2H), 7.40 (dt,  $J = 7.9, 1.0$  Hz, 1H), 7.17 (t,  $J = 7.6$  Hz, 1H), 7.06 – 7.02 (m, 1H), 6.95 – 6.89 (m, 3H), 6.81 – 6.76 (m, 3H), 5.70 (dd,  $J = 14.6, 8.0$  Hz, 1H), 5.46 (dd,  $J = 14.6, 3.5$  Hz, 1H), 5.30 (dd,  $J = 8.1, 3.4$  Hz, 1H), 3.20 (d,  $J = 14.1$  Hz, 1H), 3.00 (d,  $J = 14.1$  Hz, 1H) ppm;  $^{13}\text{C}$  NMR (100 MHz, DMSO- $d_6$ ):  $\delta$  167.02, 164.20, 133.71, 133.26, 132.65, 131.85, 129.34, 128.37, 127.70, 127.31, 127.22, 126.78, 123.72, 122.14, 120.39, 119.69, 118.95, 110.69, 74.26, 64.36, 40.55, 38.61 ppm; ESI-HRMS: calcd for  $\text{C}_{26}\text{H}_{21}\text{N}_3\text{O}_4 + \text{Na}^+$  462.1424, found 462.1427.

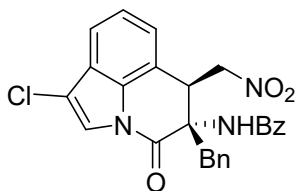

**Synthesis of 5b (procedure C):** (*E*)-3-chloro-7-(2-nitrovinyl)-1*H*-indole **4b** (22.2 mg, 0.1 mmol), 4-benzyl-2-phenyloxazol-5(4*H*)-one **2a** (30.1 mg, 0.12 mmol), **C4** (6.3 mg, 10 mol%) were dissolved in xylene (1.0 mL) and stirred at 40 °C for 12 h. After full-conversion, the residue was purified by

flash chromatography (EtOAc/petroleum ether = 1/20) to afford the pure chiral product **5b'**. Subsequently, the obtained **5b'** was dissolved in DCM (1.0 mL), then DBU (2.7 mg, 30 mol%) was added to the reaction mixture and stirred at 0 °C for 2 h. After the reaction was completed, the

residue was purified by flash chromatography (EtOAc/petroleum ether = 1/10) to afford the pure chiral product **5b** as a pale yellow solid (34.5 mg, 73% yield). M.p = 86-90 °C;  $[\alpha]_D^{20} = +1.0$  ( $c = 26.0$  in  $\text{CHCl}_3$ ); >19:1 dr, 86% ee, determined by HPLC analysis [Daicel chiralpak AD-H, *n*-hexane/*i*-PrOH = 60/40, 1.0 mL/min,  $\lambda = 254$  nm,  $t$  (minor) = 28.81 min,  $t$  (major) = 10.09 min];  $^1\text{H}$  NMR (400 MHz,  $\text{DMSO}-d_6$ ):  $\delta$  9.03 (s, 1H), 7.96 – 7.88 (m, 3H), 7.65 – 7.59 (m, 1H), 7.54 (dd,  $J = 8.2, 6.7$  Hz, 2H), 7.35 – 7.22 (m, 2H), 7.14 (dt,  $J = 7.3, 1.3$  Hz, 1H), 6.94 – 6.85 (m, 3H), 6.83 – 6.77 (m, 2H), 5.75 (dd,  $J = 14.7, 7.8$  Hz, 1H), 5.49 (dd,  $J = 14.7, 3.6$  Hz, 1H), 5.33 – 5.26 (m, 1H), 3.19 (d,  $J = 14.1$  Hz, 1H), 3.09 (d,  $J = 14.1$  Hz, 1H) ppm;  $^{13}\text{C}$  NMR (100 MHz,  $\text{DMSO}-d_6$ ):  $\delta$  167.10, 163.91, 133.54, 132.78, 131.93, 131.75, 129.30, 128.38, 127.73, 127.20, 126.84, 124.48, 124.45, 120.86, 120.29, 119.03, 116.89, 114.82, 74.08, 64.05, 40.27, 39.00 ppm; ESI-HRMS: calcd for  $\text{C}_{26}\text{H}_{20}\text{ClN}_3\text{O}_4 + \text{Na}^+$  496.1035, found 496.1044.

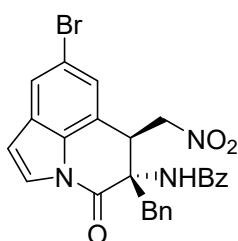

**Synthesis of 5c (procedure C):** (*E*)-5-bromo-7-(2-nitrovinyl)-1*H*-indole **4c**

(26.7 mg, 0.1 mmol), 4-benzyl-2-phenyloxazol-5(4*H*)-one **2a** (30.1 mg, 0.12 mmol), **C4** (6.3 mg, 10 mol%) were dissolved in xylene (1.0 mL) and stirred at 40 °C for 12 h. After full-conversion, the residue was purified by flash chromatography (EtOAc/petroleum ether = 1/20) to afford the pure chiral product **5c'**. Subsequently, the obtained **5c'** was dissolved in DCM (1.0 mL), then DBU (2.7 mg, 30 mol%) was added to the reaction mixture and stirred at 0 °C for 2 h. After the reaction was completed, the residue was purified by flash chromatography (EtOAc/petroleum ether = 1/10) to afford the pure chiral product **5c** as a pale yellow solid (41.9 mg, 81% yield). M.p = 96-99 °C;  $[\alpha]_D^{20} = 29.6$  ( $c = 1.0$  in  $\text{CHCl}_3$ ); >19:1 dr, 53% ee, determined by HPLC analysis [Daicel chiralpak AS-H, *n*-hexane/*i*-PrOH = 60/40, 1.0 mL/min,  $\lambda = 254$  nm,  $t$  (minor) = 22.94 min,  $t$  (major) = 40.24 min];  $^1\text{H}$  NMR (400 MHz,  $\text{DMSO}-d_6$ ):  $\delta$  9.01 (s, 1H), 7.92 – 7.88 (m, 2H), 7.73 (d,  $J = 3.6$  Hz, 1H), 7.65 – 7.59 (m, 2H), 7.57 – 7.51 (m, 2H), 7.23 (t,  $J = 1.6$  Hz, 1H), 6.95 – 6.87 (m, 3H), 6.82 – 6.77 (m, 2H), 6.75 (d,  $J = 3.6$  Hz, 1H), 5.80 (dd,  $J = 14.7, 7.3$  Hz, 1H), 5.47 (dd,  $J = 14.8, 3.9$  Hz, 1H), 5.29 (dt,  $J = 7.1, 2.6$  Hz, 1H), 3.19 (d,  $J = 14.1$  Hz, 1H), 3.07 (d,  $J = 14.1$  Hz, 1H) ppm;  $^{13}\text{C}$  NMR (100 MHz,  $\text{DMSO}-d_6$ ):  $\delta$  167.12, 164.23, 133.54, 132.85, 131.93, 131.54, 129.32, 128.90, 128.39, 127.70, 127.26, 126.94, 123.46, 122.45, 122.23, 121.73, 115.91, 110.11, 73.74, 64.17, 40.27, 38.83 ppm; ESI-HRMS: calcd for  $\text{C}_{26}\text{H}_{20}\text{BrN}_3\text{O}_4 + \text{Na}^+$  540.0529, found 540.0530.

### 3. Asymmetric [3+2] cyclization reactions of other types of functionalized indoles

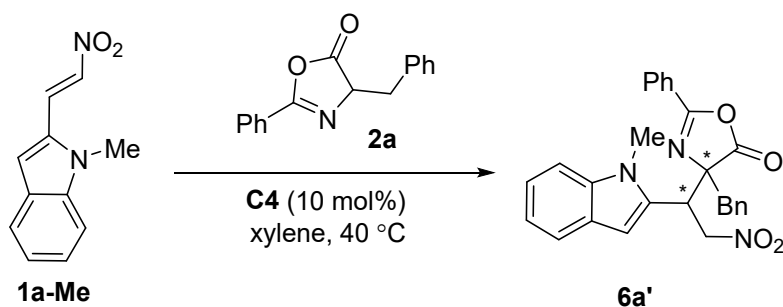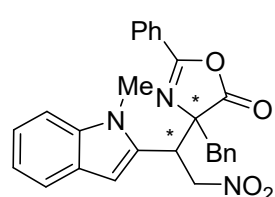

**Synthesis of 6a'**: (E)-1-methyl-2-(2-nitrovinyl)-1H-indole **1a-Me** (20.2 mg, 0.1 mmol), 4-benzyl-2-phenyloxazol-5(4H)-one **2a** (30.1 mg, 0.12 mmol), **C4** (6.3 mg, 10 mol%) were dissolved in xylene (1.0 mL) and stirred at 40 °C for 12 h. Upon workup, product **6a'** was obtained by flash

chromatography on silica gel (EtOAc/petroleum ether = 1/15) as a yellow solid (32.1 mg, 73% yield). M.p = 73-76 °C;  $[\alpha]_D^{20} = +2.7$  ( $c = 1.0$  in  $\text{CHCl}_3$ ); dr = 3:1, 53% ee, determined by HPLC analysis [Daicel chiralpak AD-H, *n*-hexane/*i*-PrOH = 90/10, 1.0 mL/min,  $\lambda = 254$  nm,  $t$  (minor) = 12.97 min,  $t$  (major) = 10.60 min];  $^1\text{H}$  NMR (400 MHz,  $\text{CDCl}_3$ ):  $\delta$  7.73 – 7.67 (m, 2H), 7.57 (dt,  $J = 7.8, 0.9$  Hz, 1H), 7.39 – 7.33 (m, 2H), 7.26 (d,  $J = 3.5$  Hz, 2H), 7.19 – 7.10 (m, 7H), 6.67 (s, 1H), 5.06 – 4.99 (m, 1H), 4.90 (dd,  $J = 14.0, 4.4$  Hz, 1H), 4.52 (dd,  $J = 10.9, 4.5$  Hz, 1H), 3.85 (s, 3H), 3.18 (d,  $J = 13.1$  Hz, 1H), 3.12 (d,  $J = 13.3$  Hz, 1H) ppm;  $^{13}\text{C}$  NMR (100 MHz,  $\text{DMSO}-d_6$ ):  $\delta$  177.01, 158.96, 136.29, 134.55, 133.10, 132.54, 129.59, 128.42, 127.48, 126.77, 126.68, 126.01, 123.82, 120.85, 119.53, 118.74, 109.15, 98.43, 75.72, 74.55, 29.09, 25.75, 24.19 ppm; ESI-HRMS: calcd for  $\text{C}_{27}\text{H}_{23}\text{N}_3\text{O}_4 + \text{H}^+$  454.1761, found 454.1884.

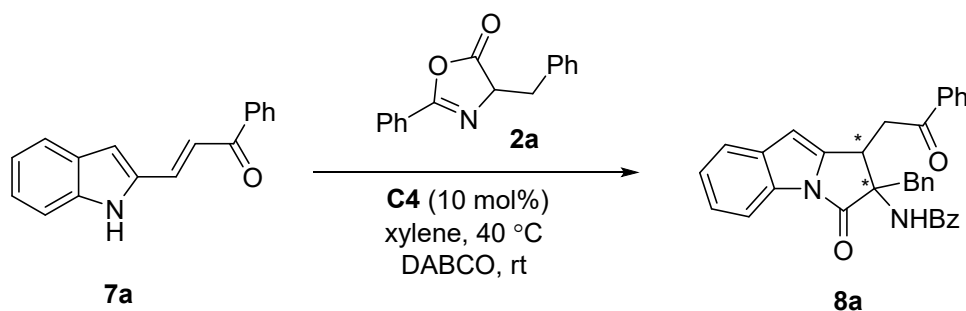

**Synthesis of 8a**: (E)-3-(1H-indol-2-yl)-1-phenylprop-2-en-1-one **7a** (24.7 mg, 0.1 mmol), 4-benzyl-2-phenyloxazol-5(4H)-one **2a** (30.1 mg, 0.12

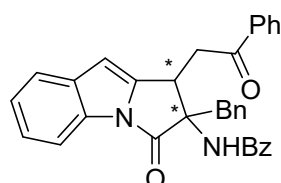

mmol), **C4** (6.3 mg, 10 mol%) were dissolved in xylene (1.0 mL) and stirred at 40 °C for 12 h. Upon workup, the reaction mixture was removed to room temperature and added DABCO (2.7 mg, 30 mol%) for further cyclization during 6 h. After the reaction was completed, product **8a** was obtained by flash chromatography on silica gel (EtOAc/petroleum ether = 1/10) as a pale yellow solid (21.4 mg, 43% yield). M.p = 77-79 °C; >19:1 dr, 0% ee, determined by HPLC analysis [Daicel chiralpak AD-H, *n*-hexane/*i*-PrOH = 70/30, 1.0 mL/min,  $\lambda$  = 254 nm]; <sup>1</sup>H NMR (400 MHz, CDCl<sub>3</sub>):  $\delta$  8.88 (s, 1H), 7.87 – 7.80 (m, 2H), 7.77 – 7.67 (m, 2H), 7.49 – 7.42 (m, 2H), 7.40 – 7.30 (m, 6H), 7.29 – 7.27 (m, 1H), 7.09 – 6.99 (m, 5H), 6.95 (ddd, *J* = 8.0, 7.0, 1.0 Hz, 1H), 6.31 (d, *J* = 2.0 Hz, 1H), 4.34 (dd, *J* = 9.3, 3.8 Hz, 1H), 3.67 (dd, *J* = 17.2, 9.3 Hz, 1H), 3.48 (dd, *J* = 17.2, 3.8 Hz, 1H), 3.18 (d, *J* = 13.4 Hz, 1H), 3.07 (d, *J* = 13.3 Hz, 1H) ppm; <sup>13</sup>C NMR (100 MHz, CDCl<sub>3</sub>):  $\delta$  197.04, 179.51, 161.20, 136.65, 136.36, 133.78, 133.53, 133.02, 130.39, 128.87, 128.83, 128.78, 128.75, 128.69, 128.27, 128.14, 128.06, 127.50, 125.33, 122.00, 120.47, 119.79, 111.21, 102.69, 42.00, 40.99, 39.46 ppm; ESI-HRMS: calcd for C<sub>33</sub>H<sub>26</sub>N<sub>2</sub>O<sub>3</sub> + H<sup>+</sup> 499.2016, found 499.2023.

#### 4. Synthetic transformations

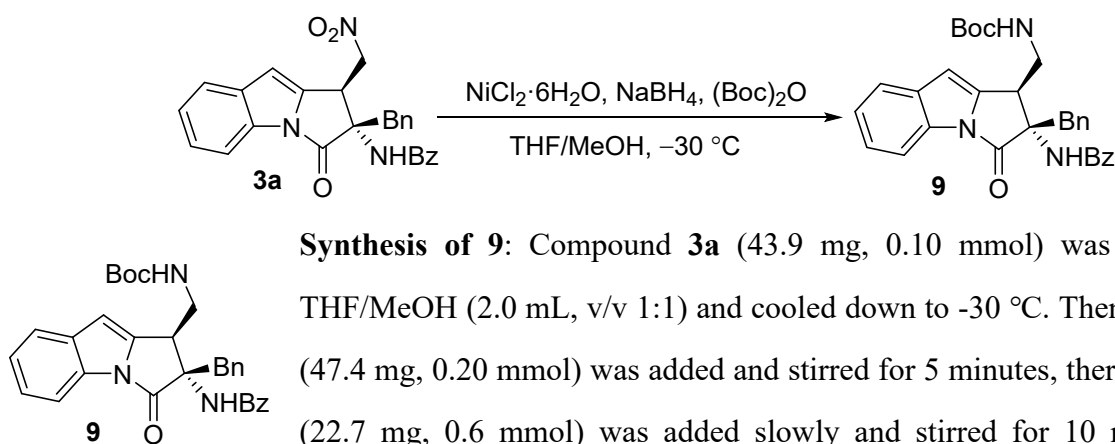

**Synthesis of 9:** Compound **3a** (43.9 mg, 0.10 mmol) was dissolved in THF/MeOH (2.0 mL, v/v 1:1) and cooled down to -30 °C. Then NiCl<sub>2</sub>·6H<sub>2</sub>O (47.4 mg, 0.20 mmol) was added and stirred for 5 minutes, thereafter NaBH<sub>4</sub> (22.7 mg, 0.6 mmol) was added slowly and stirred for 10 minutes, then followed by the addition of (Boc)<sub>2</sub>O (32.7 mg, 0.15 mmol) the reaction mixture was carried out at -30 °C for 24 h and monitored by TLC. After completion, the reaction mixture was quenched with saturated NH<sub>4</sub>Cl and extracted with DCM (3 × 5 mL). The combined organic layers were dried over anhydrous Na<sub>2</sub>SO<sub>4</sub>, then filtered and concentrated under reduced pressure to afford the residue which was purified by flash chromatography on silica gel (EtOAc/petroleum ether = 1/10) to give product **9** as a white solid (44.7 mg, 88% yield). M.p = 94-96 °C; [ $\alpha$ ]<sub>D</sub><sup>20</sup> = +20.2 (*c* = 1.0 in CHCl<sub>3</sub>); >19:1 dr, 90% ee, determined by HPLC analysis [Daicel chiralpak IB N-5, *n*-hexane/*i*-

PrOH = 80/20, 1.0 mL/min,  $\lambda$  = 254 nm, t (minor) = 6.77 min, t (major) = 10.93 min];  $^1\text{H}$  NMR (400 MHz, DMSO- $d_6$ ):  $\delta$  8.90 (s, 1H), 7.93 – 7.85 (m, 3H), 7.61 (t,  $J$  = 7.3 Hz, 1H), 7.57 – 7.50 (m, 3H), 7.33 – 7.23 (m, 3H), 7.22 – 7.14 (m, 2H), 7.06 (p,  $J$  = 3.7 Hz, 3H), 6.37 (d,  $J$  = 1.9 Hz, 1H), 4.13 (t,  $J$  = 7.3 Hz, 1H), 3.66 (dd,  $J$  = 11.1, 5.9 Hz, 2H), 3.42 (d,  $J$  = 14.1 Hz, 1H), 3.07 (d,  $J$  = 14.1 Hz, 1H), 1.36 (s, 9H) ppm;  $^{13}\text{C}$  NMR (100 MHz, DMSO- $d_6$ ):  $\delta$  168.89, 166.22, 155.69, 141.79, 134.49, 133.90, 133.34, 131.85, 130.15, 130.10, 129.98, 128.34, 127.61, 127.56, 126.69, 123.74, 123.28, 120.73, 112.70, 99.59, 77.98, 67.97, 42.82, 37.82, 28.15 ppm; ESI-HRMS: calcd for  $\text{C}_{31}\text{H}_{31}\text{N}_3\text{O}_4 + \text{Na}^+$  532.2207, found 532.2208.

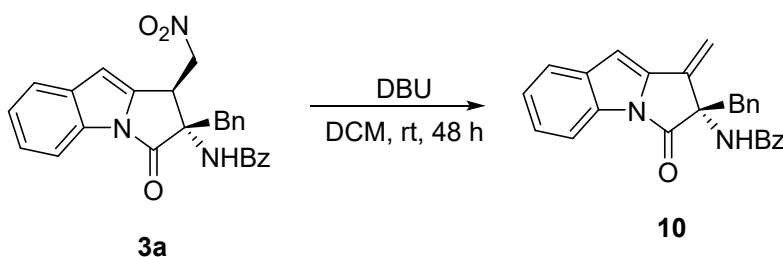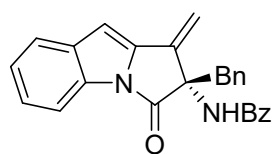

**Synthesis of 10:** Compound **3a** (43.9 mg, 0.1 mmol) was dissolved in DCM (2 mL), DBU (38.0 mg, 0.25 mmol) was added and the solution was stirred at room temperature for 48 h. After the reaction was completed, product **10**

was obtained by flash chromatography on silica gel (EtOAc/petroleum ether = 1/10) as a white solid (24.7 mg, 63% yield). M.p = 92-96 °C;  $[\alpha]_{\text{D}}^{20}$  = +26.0 ( $c$  = 1.0 in  $\text{CHCl}_3$ ); >19:1 dr, 89% ee, determined by HPLC analysis [Daicel chiralpak IB N-5,  $n$ -hexane/ $i$ -PrOH = 70/30, 1.0 mL/min,  $\lambda$  = 254 nm, t (minor) = 6.31 min, t (major) = 7.37 min];  $^1\text{H}$  NMR (400 MHz, DMSO- $d_6$ ):  $\delta$  9.35 (s, 1H), 7.87 (dd, 3H), 7.59 (dd,  $J$  = 8.3, 6.3 Hz, 1H), 7.50 (t, 3H), 7.27 (t, 1H), 7.22 (t, 1H), 7.13 – 7.06 (m, 2H), 7.04 – 6.94 (m, 3H), 6.56 (s, 1H), 5.84 (s, 1H), 5.55 (s, 1H), 3.42 (dd, 2H) ppm;  $^{13}\text{C}$  NMR (100 MHz, DMSO- $d_6$ ):  $\delta$  169.99, 166.40, 140.54, 139.36, 134.55, 133.52, 133.33, 132.39, 130.54, 130.37, 128.86, 128.21, 128.11, 127.50, 124.65, 124.52, 121.93, 113.49, 109.33, 98.49, 68.75, 42.74 ppm; ESI-HRMS: calcd for  $\text{C}_{26}\text{H}_{20}\text{N}_2\text{O}_2 + \text{Na}^+$  415.1417, found 415.1424.

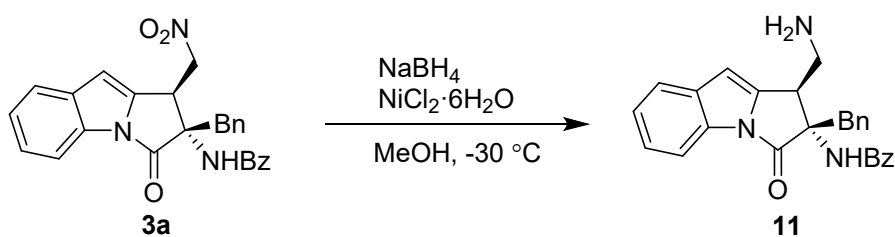

**Synthesis of 11:** Compound **3a** (43.9 mg, 0.10 mmol) was dissolved in 2 mL of MeOH, the reaction was cooled down to -30 °C. NiCl<sub>2</sub>·6H<sub>2</sub>O (47.4 mg, 0.20 mmol) was added and stirred for 5 minutes, then NaBH<sub>4</sub> (22.7 mg, 0.6 mmol) was added slowly, then the reaction was carried out at -30 °C for 30 minutes. The reaction was monitored by TLC and was completed, then quenched with saturated NH<sub>4</sub>Cl, the reaction was concentrated under reduced pressure, and extracted with DCM (3 × 5 mL). Product **11** was obtained by flash chromatography on silica gel (MeOH/DCM = 1/50) as a white solid (33.1 mg, 81% yield).

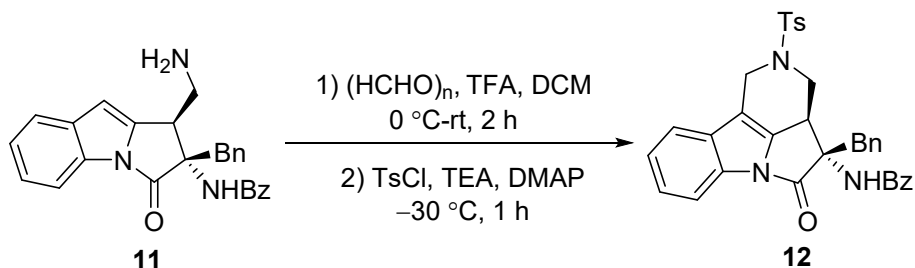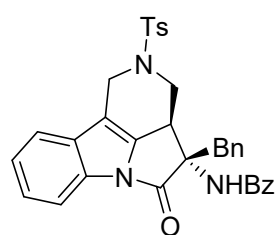

**Synthesis of 12:** Compound **11** (20.4 mg, 0.05 mmol) and (HCHO)<sub>n</sub> (1.8 mg, 0.06 mmol) were dissolved in DCM (1 mL), the reaction was cooled down at 0 °C, and TFA (5.7 mg, 0.05 mmol) was slowly added dropwise, the reaction was stirred at room temperature for 2 h. After the reaction was completed, the reaction was extracted with DCM (3 × 5 mL), then the

filtrate was concentrated under reduced pressure, obtain the product of the closing ring. The product was dissolved in dry DCM and cooled down at -30 °C, then TEA (7.6 mg, 0.075 mmol) and DMAP (1.3 mg, 20 mol%) were added, and Ts-Cl (6.6 mg, 0.06 mmol) was added slowly, and the solution was reacted and stirred at -30 °C for 1h, and after the reaction was completed, product **12** was obtained by flash chromatography on silica gel (EtOAc/petroleum ether = 1/10) as a white solid (20.1 mg, 70% yield). M.p = 103-105 °C; [ $\alpha$ ]<sub>D</sub><sup>20</sup> = -24.2 (*c* = 1.0 in CHCl<sub>3</sub>); >19:1 dr, 89% ee, determined by HPLC analysis [Daicel chiralpak IB N-5, *n*-hexane/*i*-PrOH = 70/30, 1.0 mL/min,  $\lambda$  = 254 nm, *t* (minor) = 12.58 min, *t* (major) = 13.99 min]; <sup>1</sup>H NMR (400 MHz, DMSO-*d*<sub>6</sub>):  $\delta$  10.98 (s, 1H), 7.69 (t, *J* = 8.1 Hz, 4H), 7.57 (t, *J* = 7.4 Hz, 1H), 7.47 (q, *J* = 7.7 Hz, 3H), 7.41 (d, *J* = 8.0 Hz, 3H), 7.14 (h, *J* = 5.1 Hz, 4H), 7.07 – 6.99 (m, 3H), 4.59 (d, *J* = 13.9 Hz, 1H), 3.93 (dd, *J* = 12.9, 2.4 Hz, 1H), 3.84 (d, *J* = 13.9 Hz, 1H), 3.72 (d, *J* = 4.0 Hz, 1H), 3.54 (d, *J* = 13.2 Hz, 1H), 3.39 (d, *J* = 13.2 Hz, 1H), 3.01 (dd, *J* = 12.8, 4.2 Hz, 1H), 2.36 (s, 3H) ppm; <sup>13</sup>C NMR (100 MHz, DMSO-*d*<sub>6</sub>):  $\delta$  178.52, 159.22, 143.44, 136.38, 133.79, 132.93, 132.47, 130.10, 129.84, 128.92, 128.63, 127.93,

127.64, 127.24, 127.18, 125.59, 124.35, 121.76, 118.91, 117.68, 111.54, 107.38, 77.33, 45.73, 42.59, 41.67, 31.10, 20.92 ppm; ESI-HRMS: calcd for C<sub>34</sub>H<sub>29</sub>N<sub>3</sub>O<sub>4</sub>S + Na<sup>+</sup> 598.1771, found 598.1777.

## 5. Failed trials of other azlactones under the optimized conditions

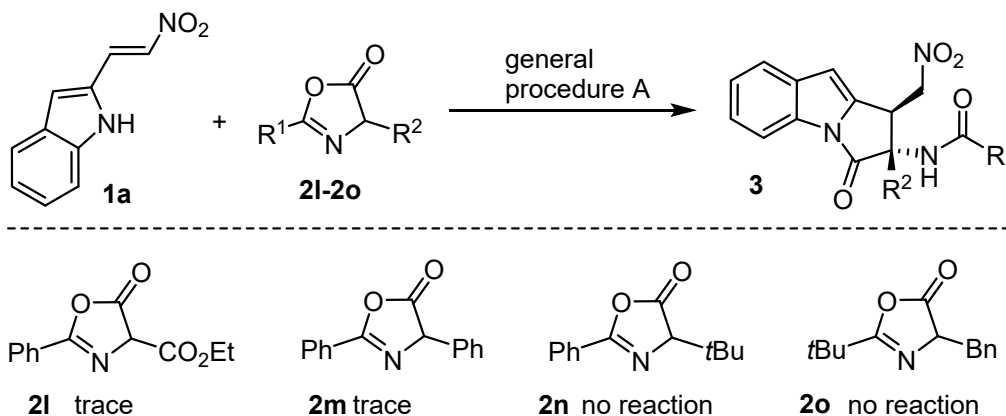

## 6. Crystal data for enantiopure cycloadducts **3x**

**Crystallization of **3x**:** The pure product **3x** (25 mg) was dissolved in the mixture solvent of *n*-hexane and dichloromethane (2 mL, 3:1, v/v) in a 10 mL vial. Then, the solution was allowed for slow evaporation to afford the crystal of **3x** in a good quality for the crystallography analysis.

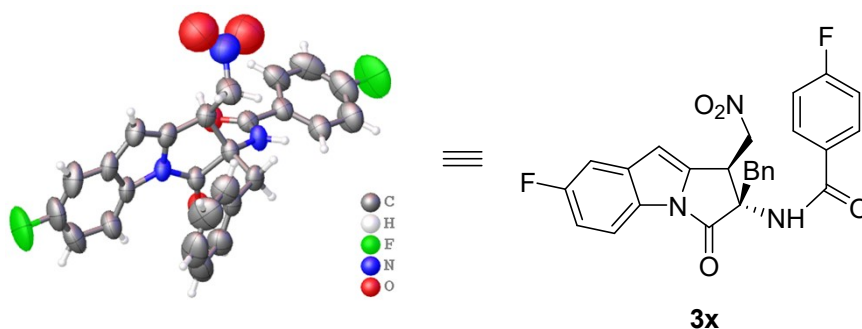

|                     |                                                                              |
|---------------------|------------------------------------------------------------------------------|
| Identification code | <b>3x</b>                                                                    |
| Empirical formula   | C <sub>26</sub> H <sub>19</sub> F <sub>2</sub> N <sub>3</sub> O <sub>4</sub> |
| Formula weight      | 475.45                                                                       |
| Temperature/K       | 200.0                                                                        |
| Crystal system      | monoclinic                                                                   |
| Space group         | P2 <sub>1</sub>                                                              |

|                                                |                                                                 |
|------------------------------------------------|-----------------------------------------------------------------|
| a/Å                                            | 12.0073(5)                                                      |
| b/Å                                            | 24.9718(10)                                                     |
| c/Å                                            | 17.9593(8)                                                      |
| $\alpha/^\circ$                                | 90                                                              |
| $\beta/^\circ$                                 | 108.3510(10)                                                    |
| $\gamma/^\circ$                                | 90                                                              |
| Volume/Å <sup>3</sup>                          | 5111.1(4)                                                       |
| Z                                              | 8                                                               |
| $\rho_{\text{calc}}/\text{g}/\text{cm}^3$      | 1.401                                                           |
| $\mu/\text{mm}^{-1}$                           | 0.255                                                           |
| F(000)                                         | 2218.0                                                          |
| Crystal size/mm <sup>3</sup>                   | 0.39 × 0.33 × 0.12                                              |
| Radiation                                      | MoK $\alpha$ ( $\lambda$ = 0.71073)                             |
| 2 $\Theta$ range for data collection/ $^\circ$ | 3.928 to 54.984                                                 |
| Index ranges                                   | -15 ≤ h ≤ 15, -32 ≤ k ≤ 32, -23 ≤ l ≤ 23                        |
| Reflections collected                          | 69498                                                           |
| Independent reflections                        | 23175 [ $R_{\text{int}}$ = 0.0643, $R_{\text{sigma}}$ = 0.0661] |
| Data/restraints/parameters                     | 23175/145/1341                                                  |
| Goodness-of-fit on F <sup>2</sup>              | 1.030                                                           |
| Final R indexes [ $I \geq 2\sigma(I)$ ]        | $R_1$ = 0.0795, $wR_2$ = 0.2088                                 |
| Final R indexes [all data]                     | $R_1$ = 0.1316, $wR_2$ = 0.2516                                 |
| Largest diff. peak/hole / e Å <sup>-3</sup>    | 0.38/-0.53                                                      |
| Flack parameter                                | 0.06(5)                                                         |

## References

- [1] Justin M. Lopchuk, Gordon W. Gribble; *Heterocycles*. **2011**, 82, 1617-1631.
- [2] Amanda C. de Mello, Patricia B. Momo, Antonio C. B. Burtoloso, and Giovanni W. Amarante. *J. Org. Chem.* **2018**, 83, 11399-11406.

## 7. NMR spectra and HPLC chromatograms

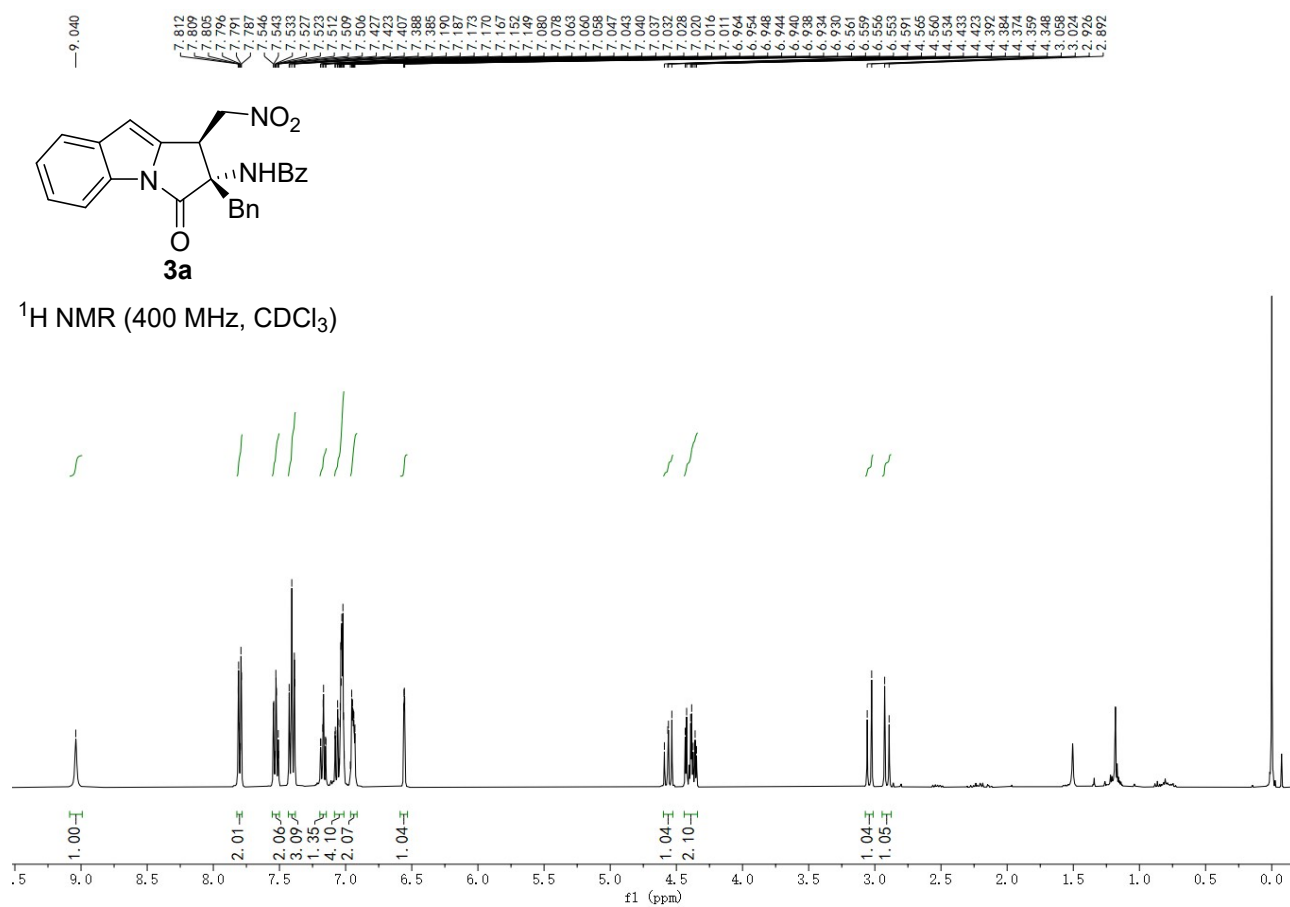

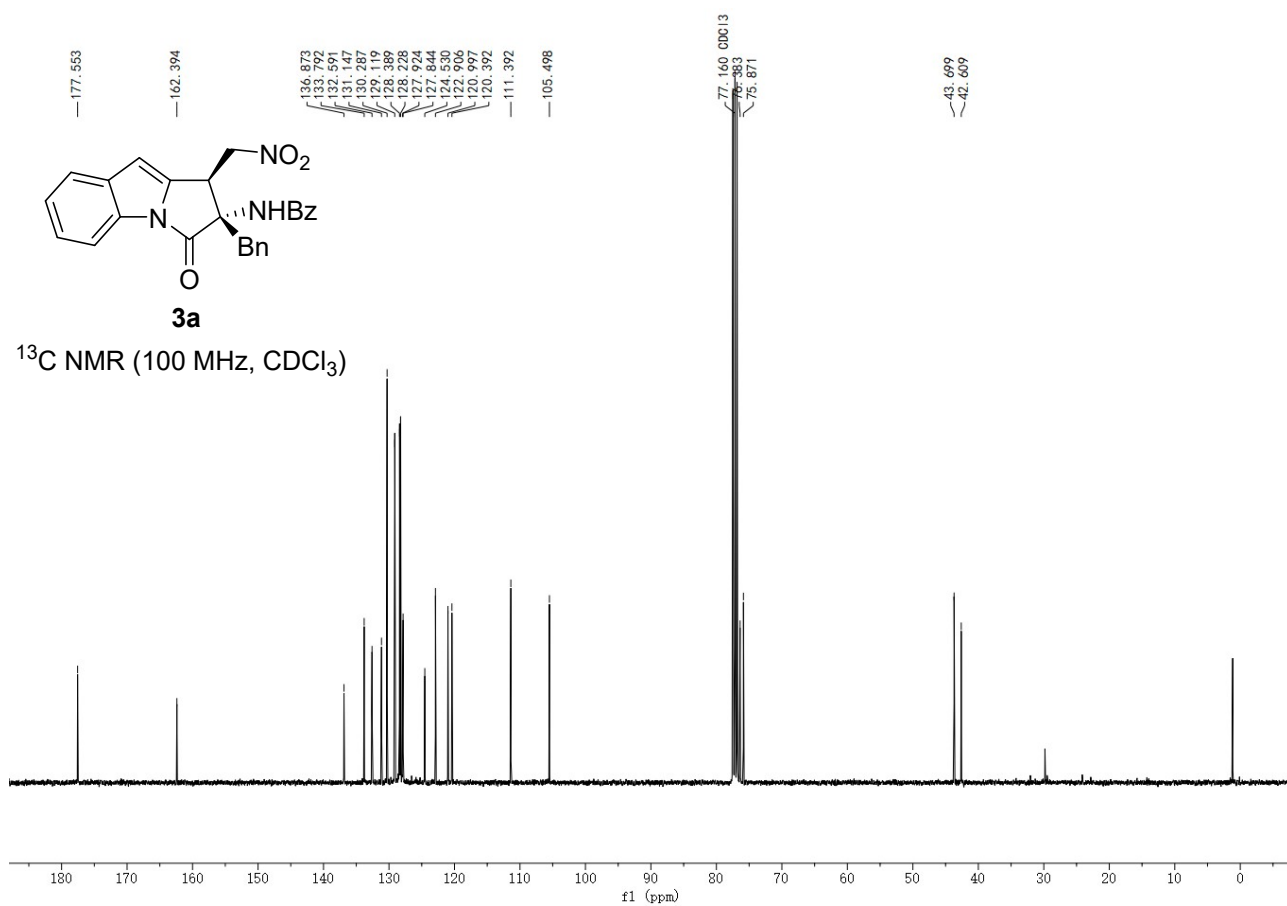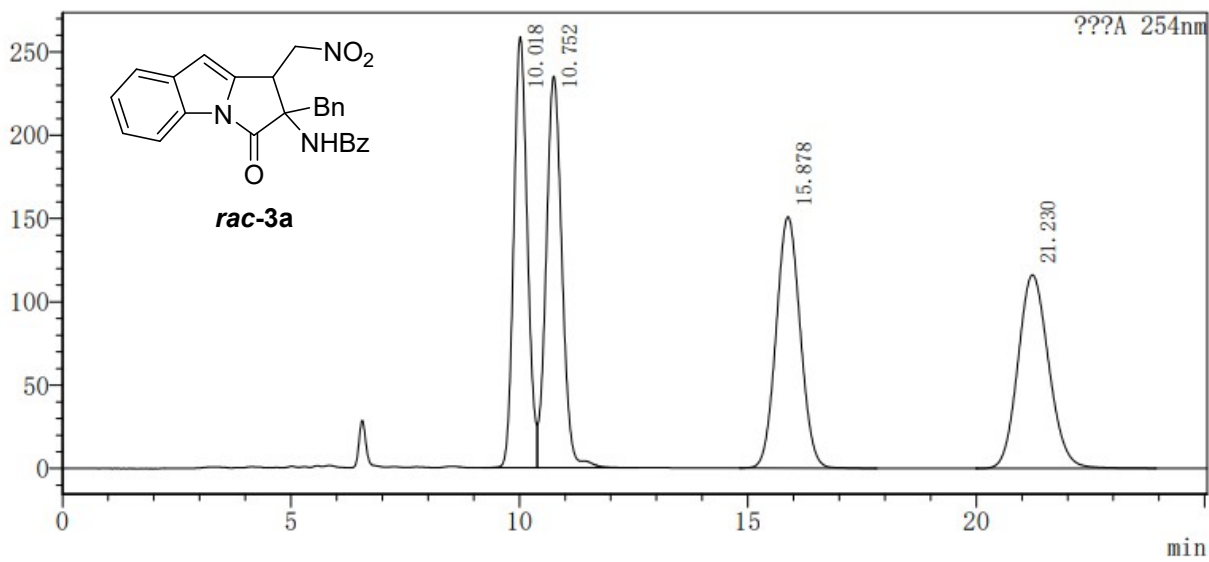

| Peak# | Ret. Time | Area     | Height | Area%   | Height% |
|-------|-----------|----------|--------|---------|---------|
| 1     | 10.018    | 5342463  | 258631 | 24.338  | 34.002  |
| 2     | 10.752    | 5645295  | 235063 | 25.718  | 30.904  |
| 3     | 15.878    | 5525579  | 150827 | 25.173  | 19.829  |
| 4     | 21.230    | 5437407  | 116110 | 24.771  | 15.265  |
| Total |           | 21950743 | 760630 | 100.000 | 100.000 |

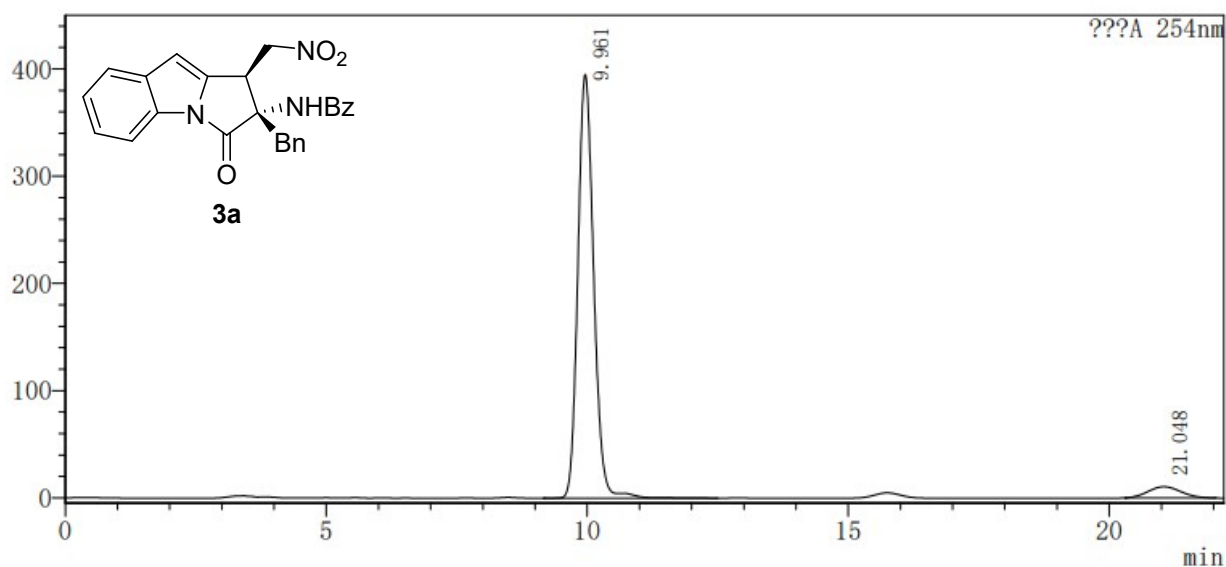

| Peak# | Ret. Time | Area    | Height | Area%   | Height% |
|-------|-----------|---------|--------|---------|---------|
| 1     | 9.961     | 8333629 | 395084 | 94.788  | 97.423  |
| 2     | 21.048    | 458218  | 10451  | 5.212   | 2.577   |
| Total |           | 8791847 | 405535 | 100.000 | 100.000 |

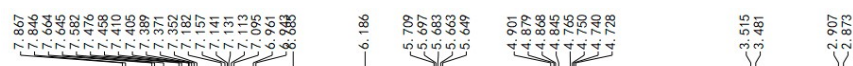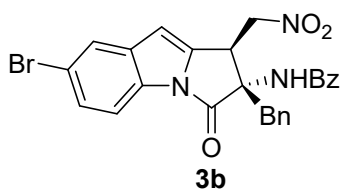

<sup>1</sup>H NMR (400 MHz, CDCl<sub>3</sub>)

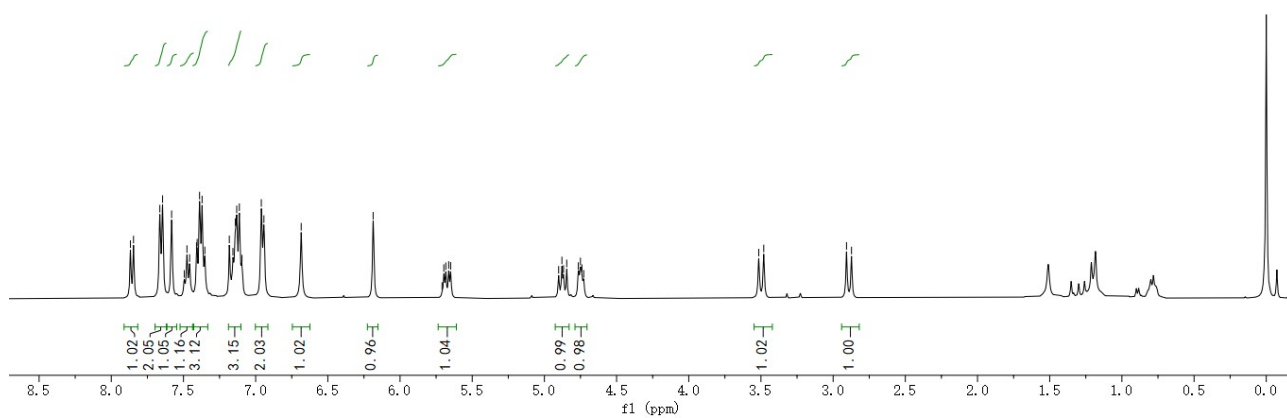

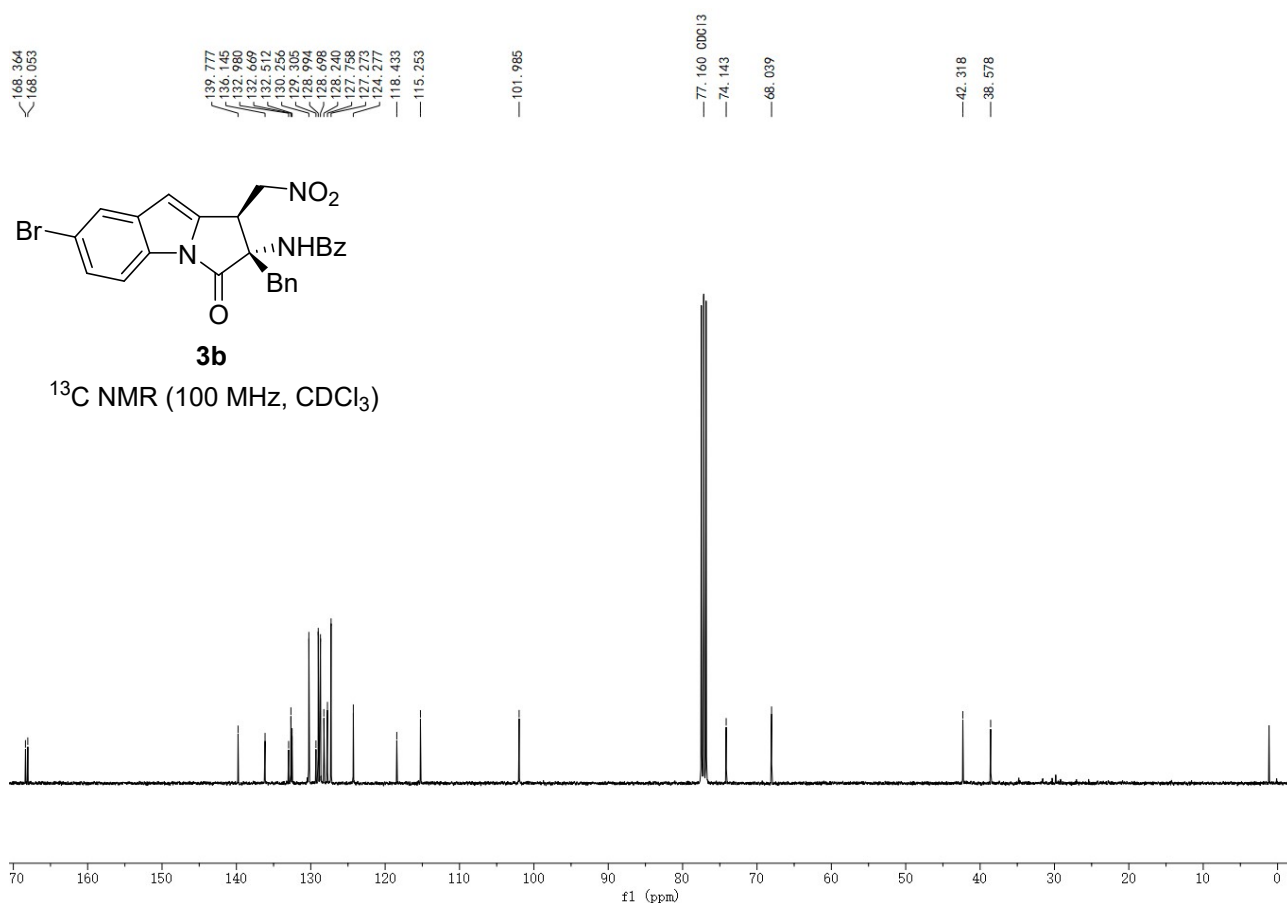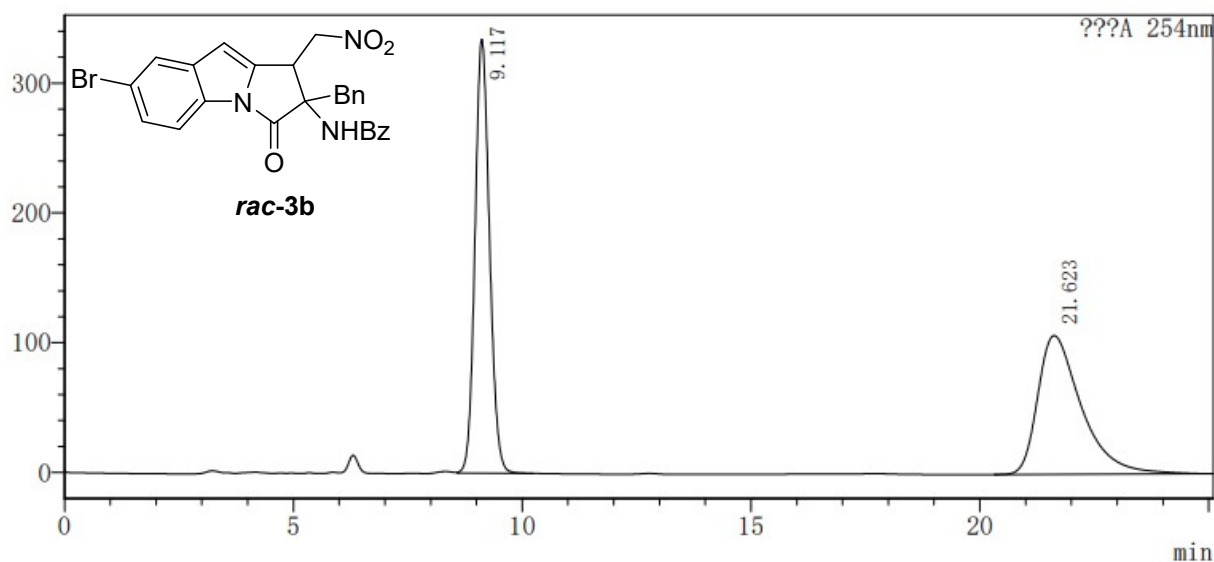

| Peak# | Ret. Time | Area     | Height | Area%   | Height% |
|-------|-----------|----------|--------|---------|---------|
| 1     | 9.117     | 7374473  | 334211 | 50.985  | 75.765  |
| 2     | 21.623    | 7089563  | 106905 | 49.015  | 24.235  |
| Total |           | 14464036 | 441116 | 100.000 | 100.000 |

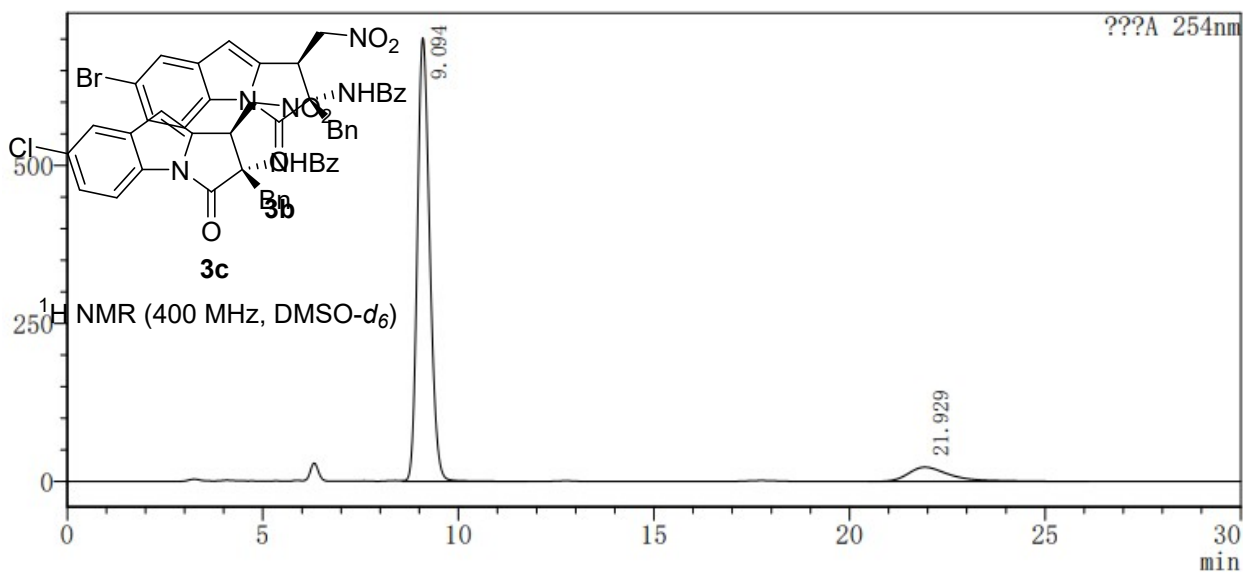

| Peak# | Ret. Time | Area     | Height | Area%   | Height% |
|-------|-----------|----------|--------|---------|---------|
| 1     | 9.094     | 15406142 | 701734 | 90.180  | 96.890  |
| 2     | 21.929    | 1677695  | 22527  | 9.820   | 3.110   |
| Total |           | 17083837 | 724261 | 100.000 | 100.000 |

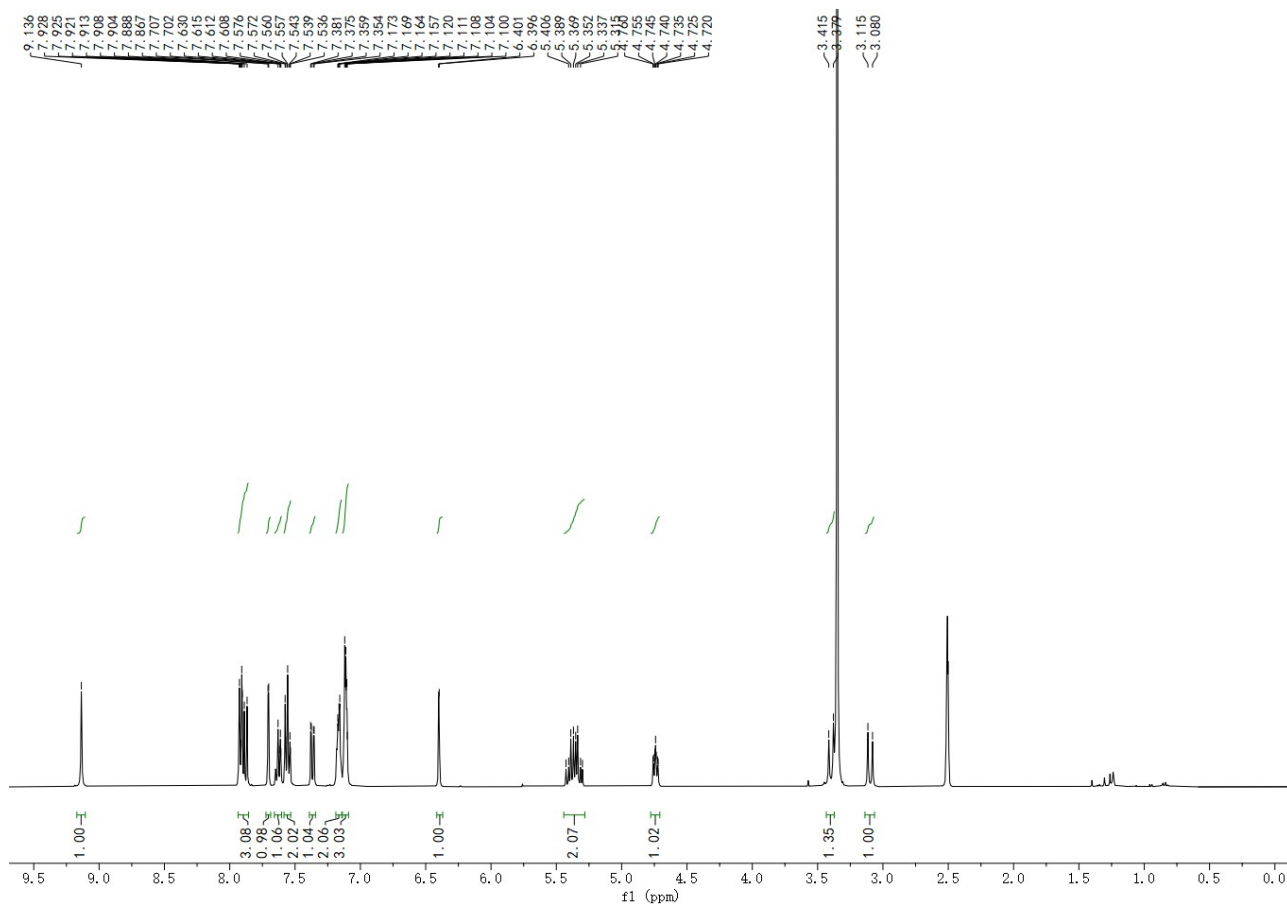

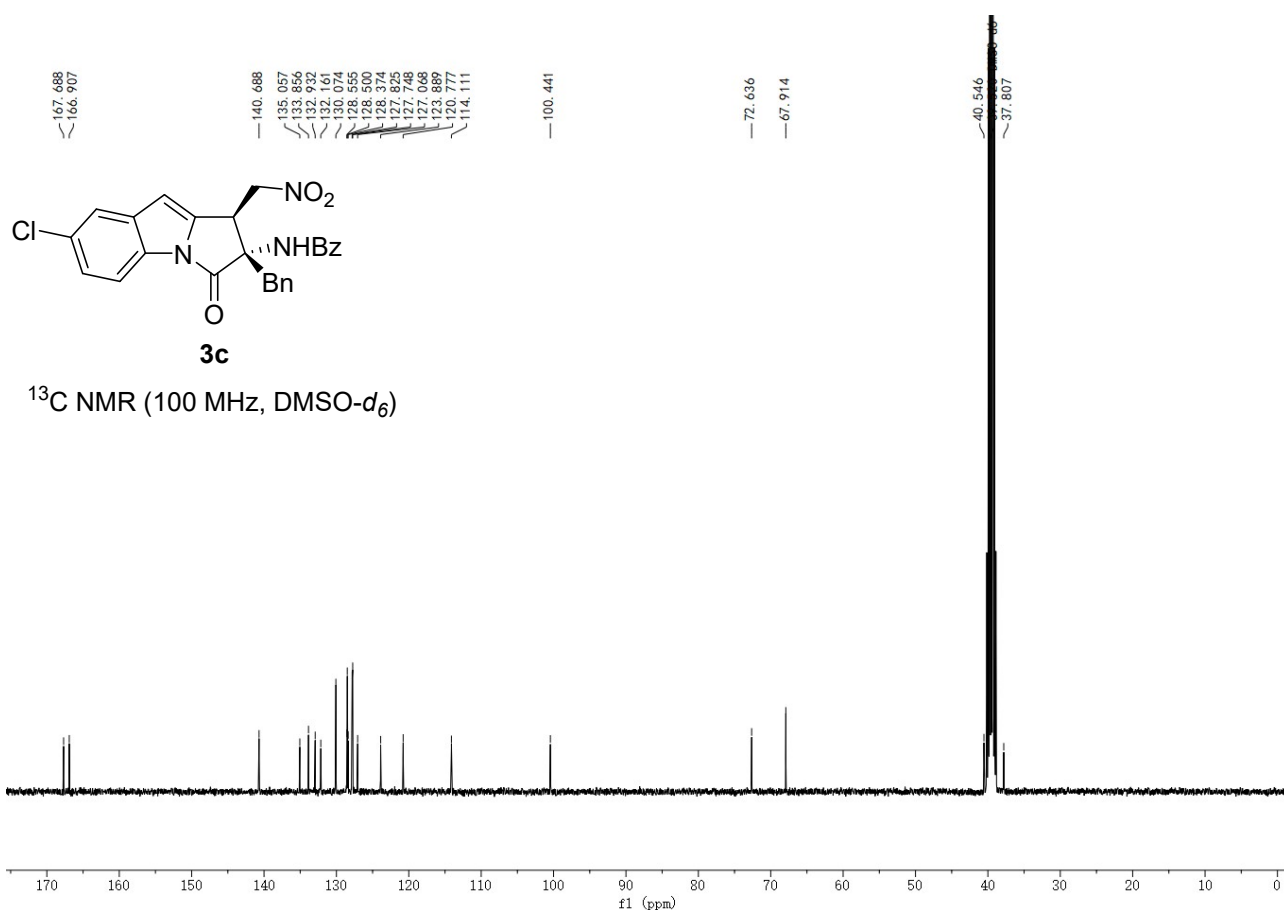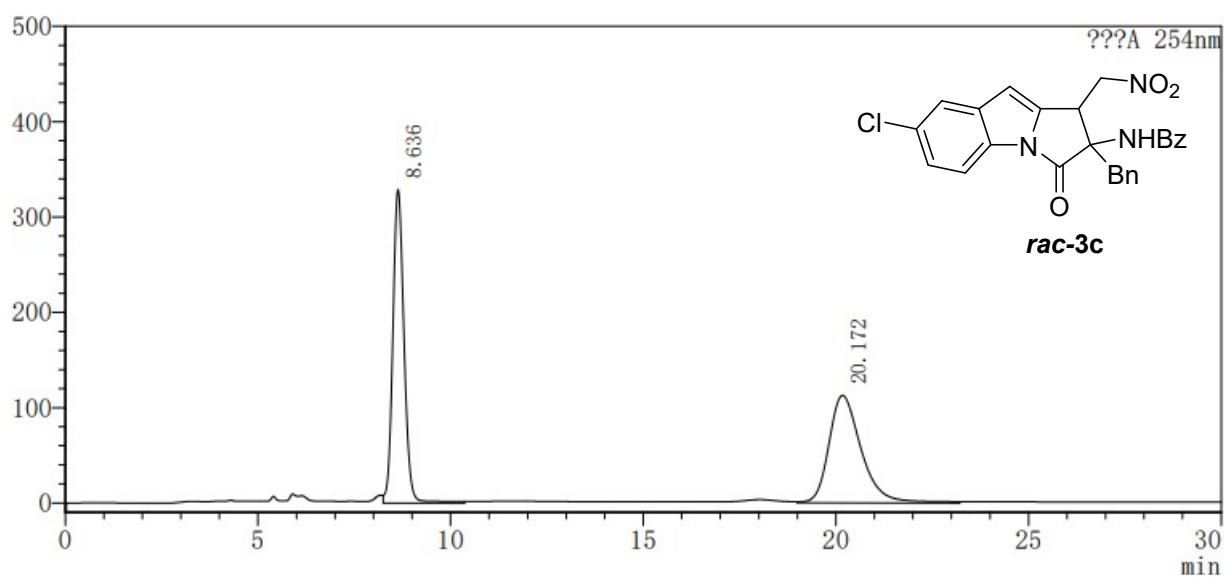

| Peak# | Ret. Time | Area     | Height | Area%   | Height% |
|-------|-----------|----------|--------|---------|---------|
| 1     | 8.636     | 6651875  | 328801 | 50.225  | 74.490  |
| 2     | 20.172    | 6592227  | 112602 | 49.775  | 25.510  |
| Total |           | 13244102 | 441403 | 100.000 | 100.000 |

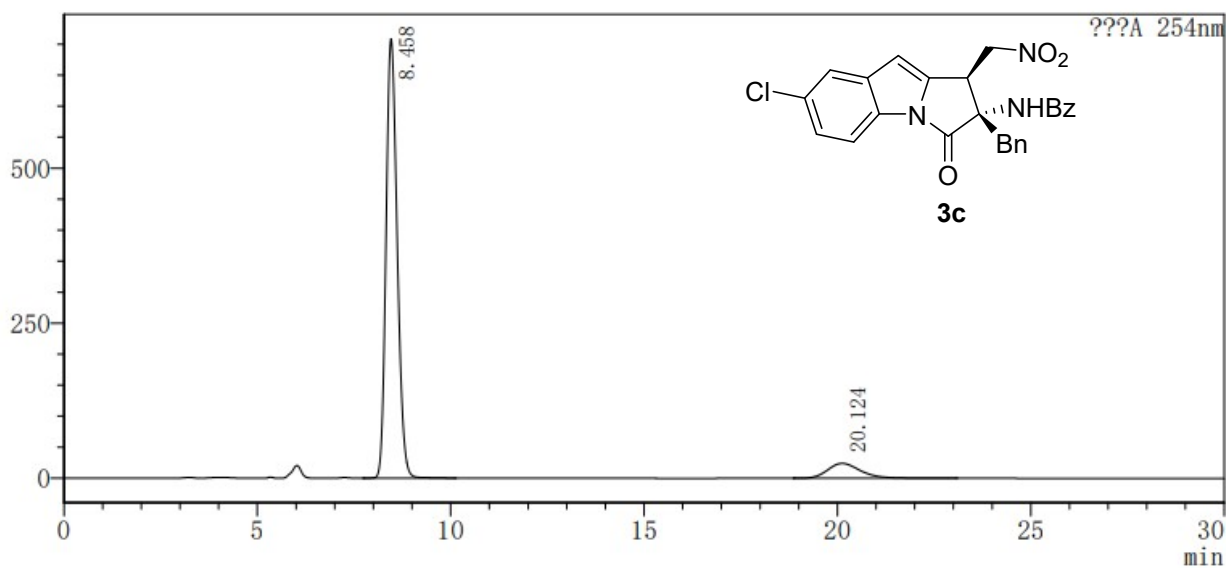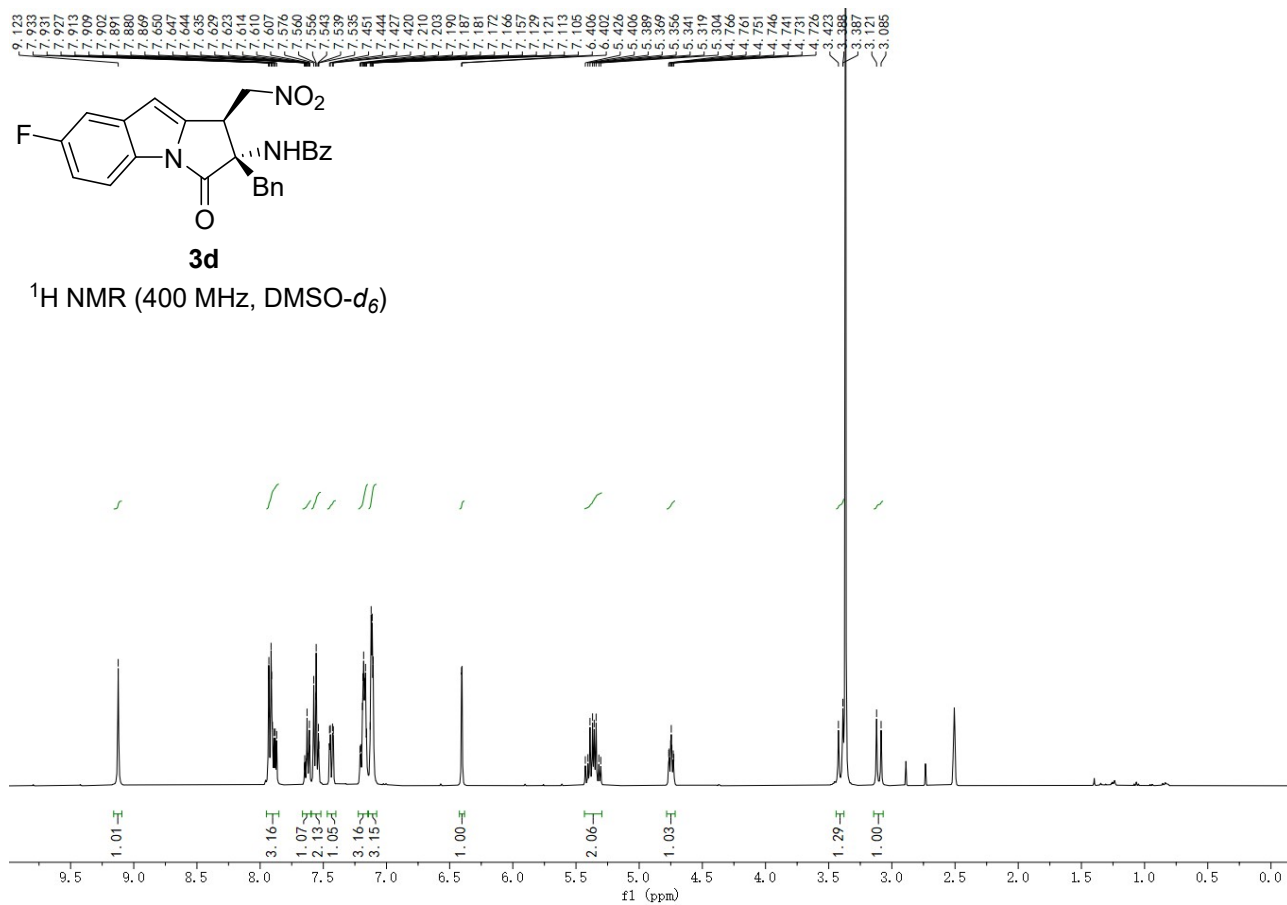

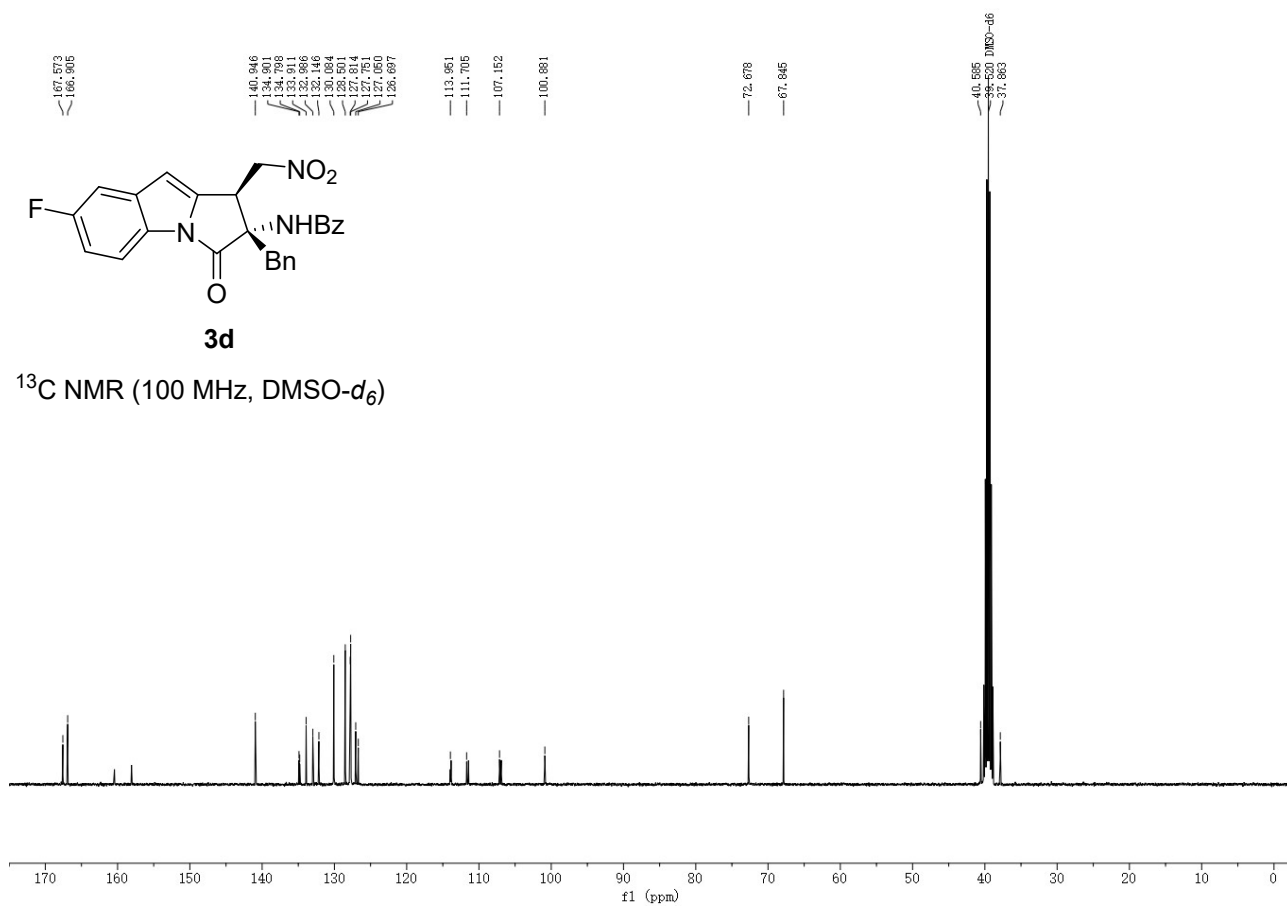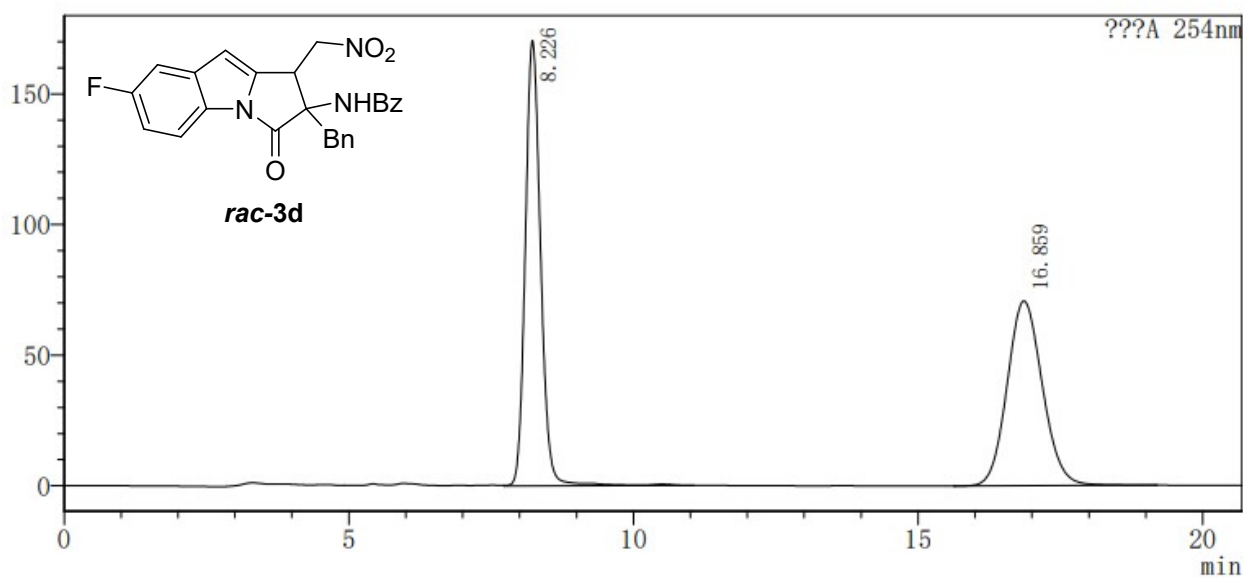

| Peak# | Ret. Time | Area    | Height | Area%   | Height% |
|-------|-----------|---------|--------|---------|---------|
| 1     | 8.226     | 3197538 | 170440 | 51.160  | 70.668  |
| 2     | 16.859    | 3052509 | 70745  | 48.840  | 29.332  |
| Total |           | 6250047 | 241185 | 100.000 | 100.000 |

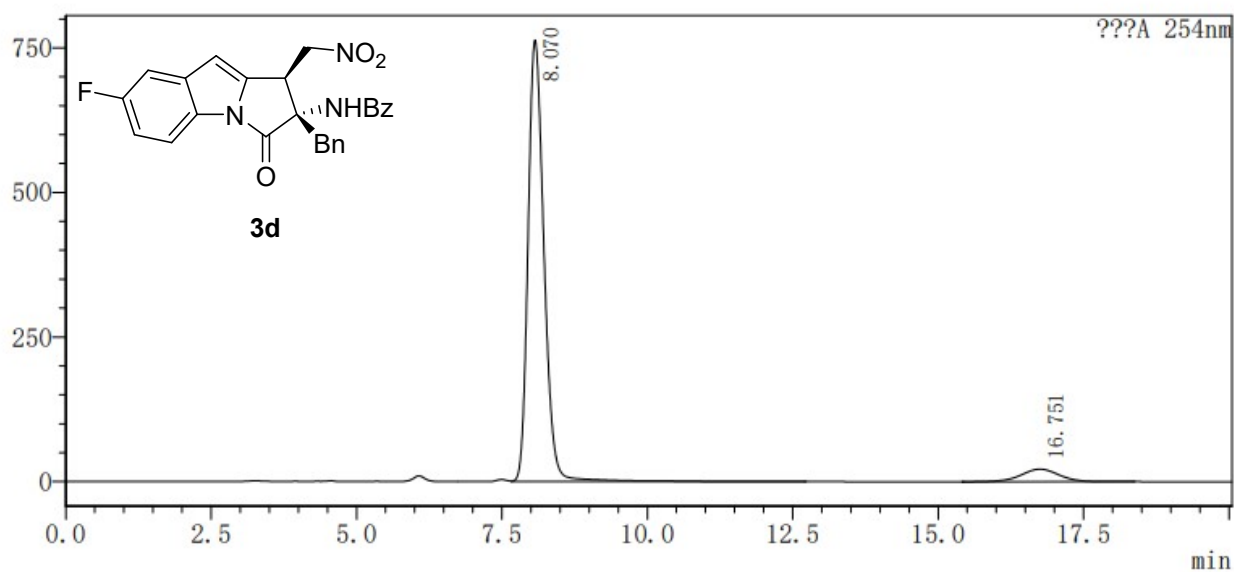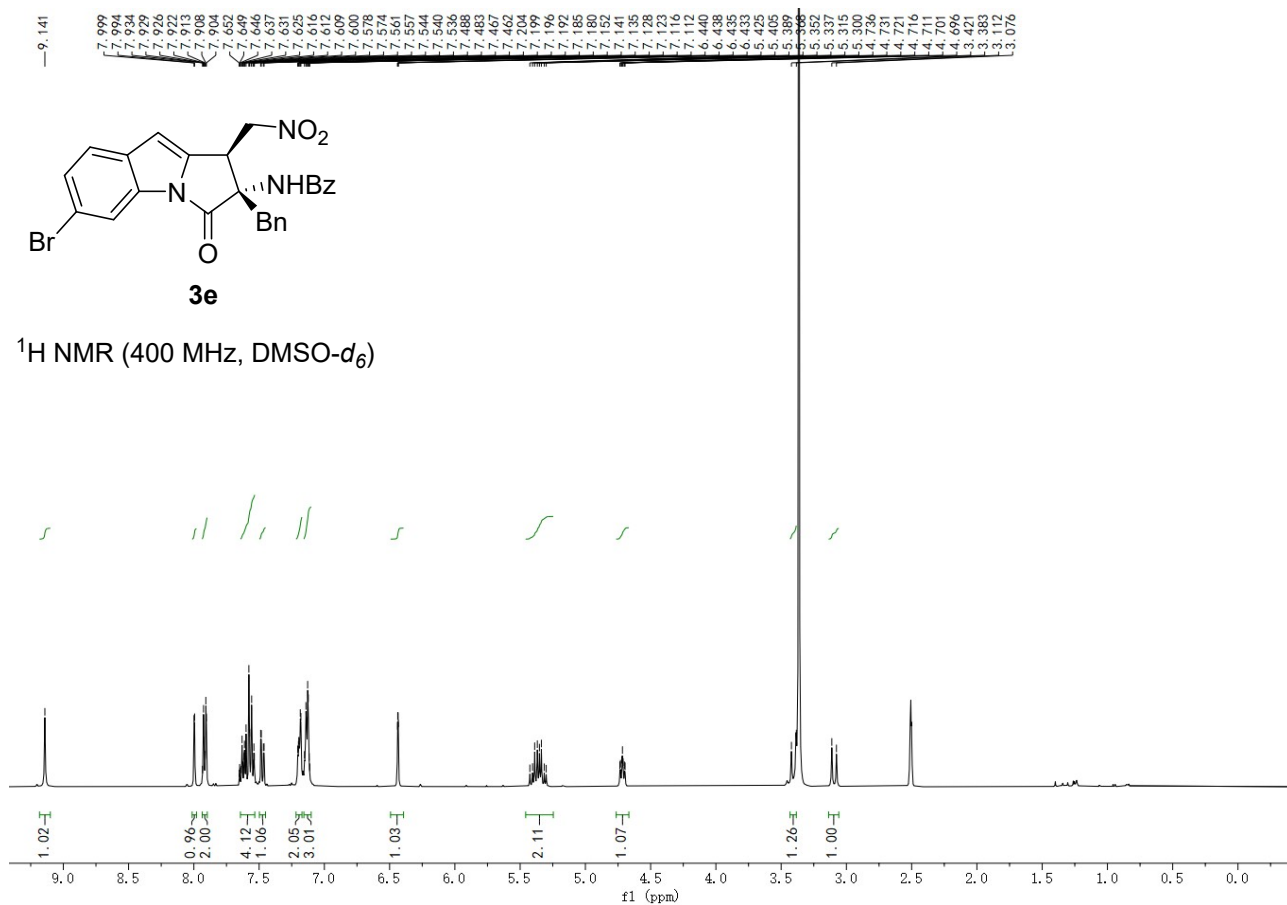

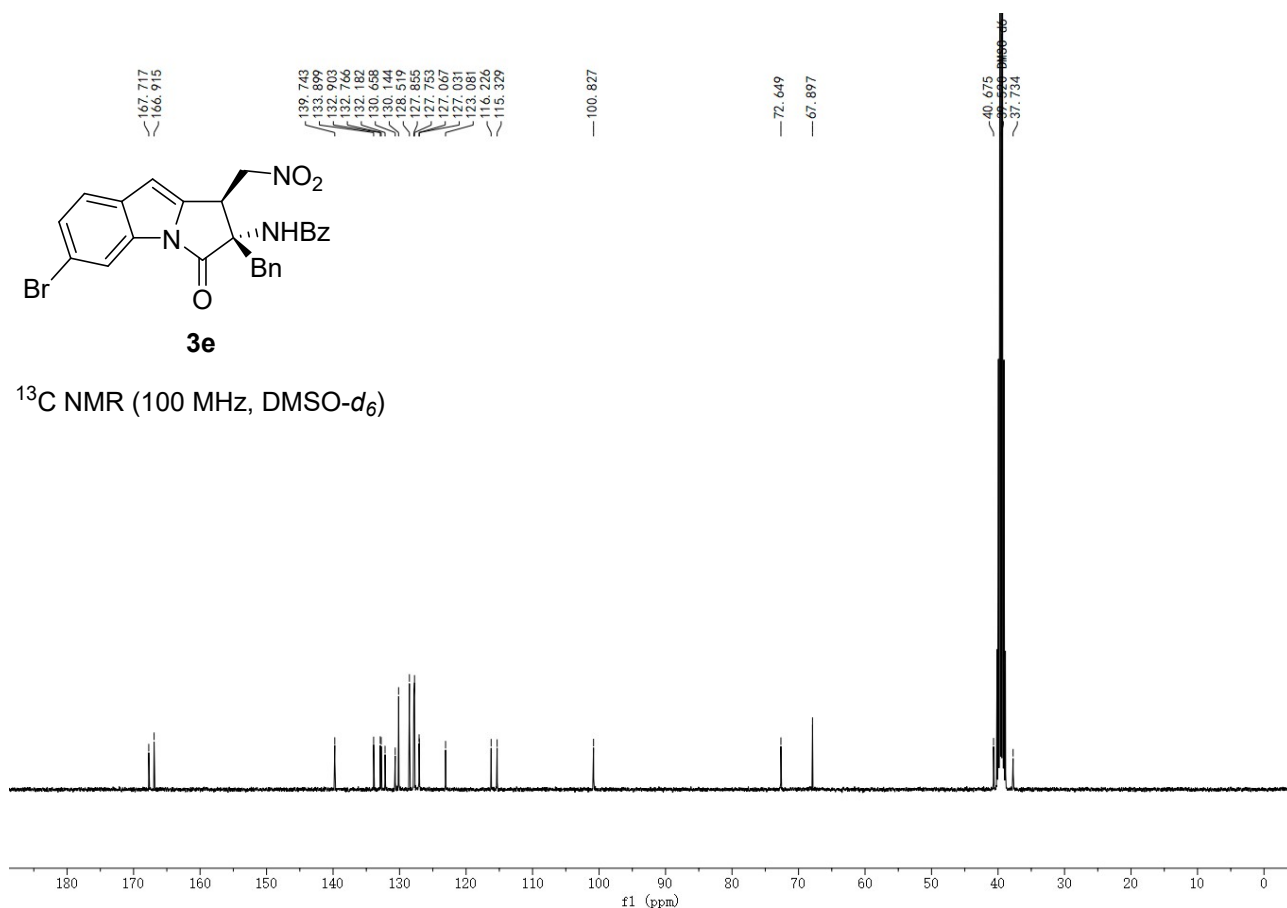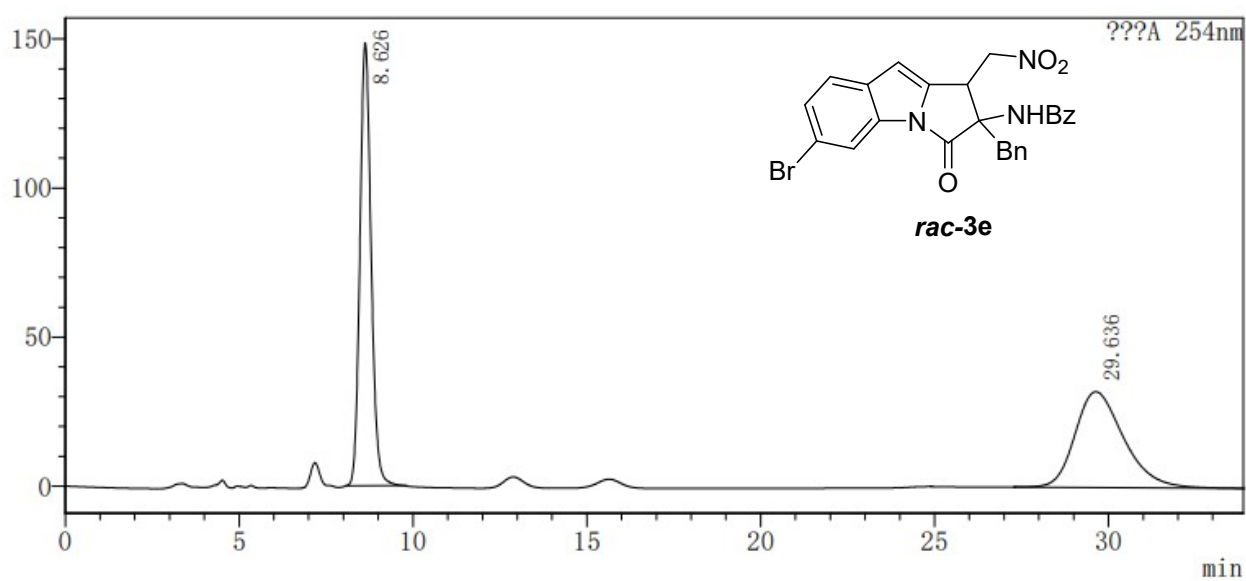

| Peak# | Ret. Time | Area    | Height | Area%   | Height% |
|-------|-----------|---------|--------|---------|---------|
| 1     | 8.626     | 3325131 | 148523 | 51.550  | 82.232  |
| 2     | 29.636    | 3125134 | 32091  | 48.450  | 17.768  |
| Total |           | 6450265 | 180614 | 100.000 | 100.000 |

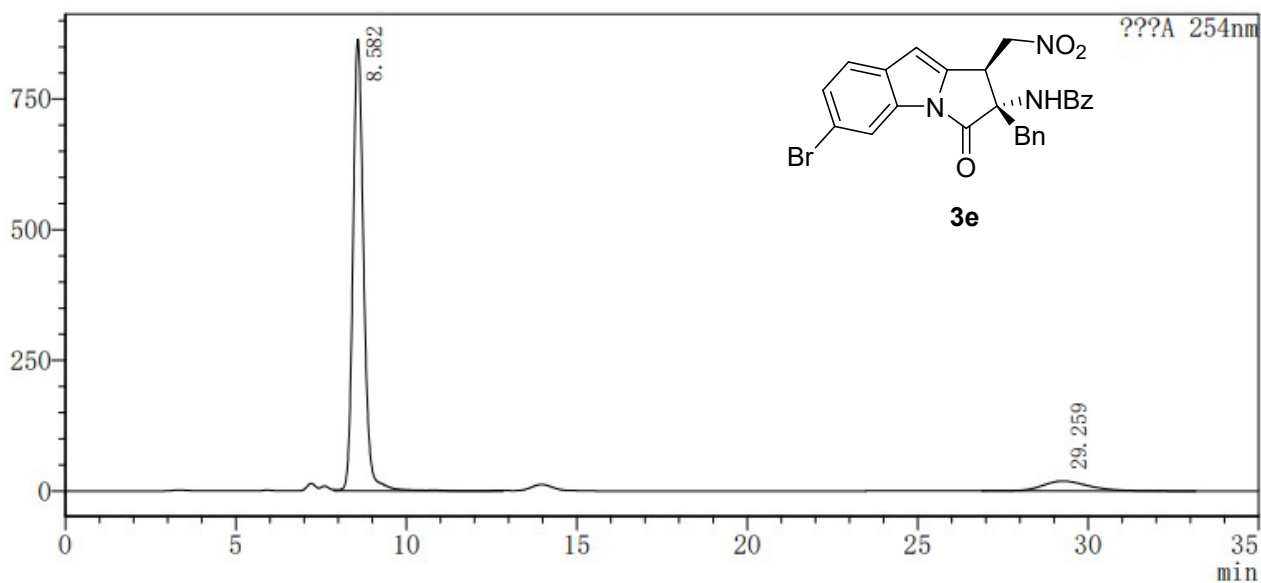

| Peak# | Ret. Time | Area     | Height | Area%   | Height% |
|-------|-----------|----------|--------|---------|---------|
| 1     | 8.582     | 18980136 | 864008 | 91.460  | 97.862  |
| 2     | 29.259    | 1772344  | 18876  | 8.540   | 2.138   |
| Total |           | 20752480 | 882884 | 100.000 | 100.000 |

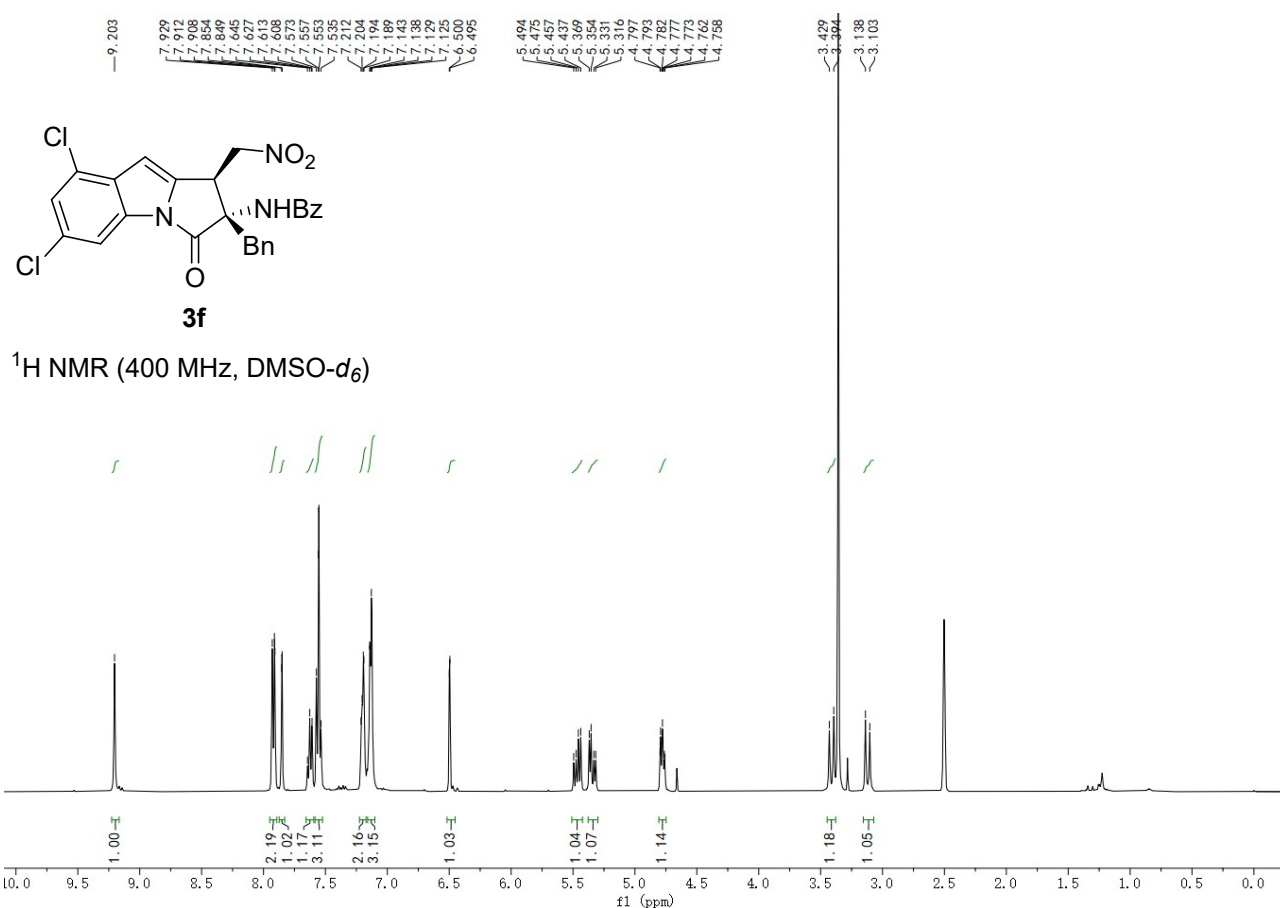

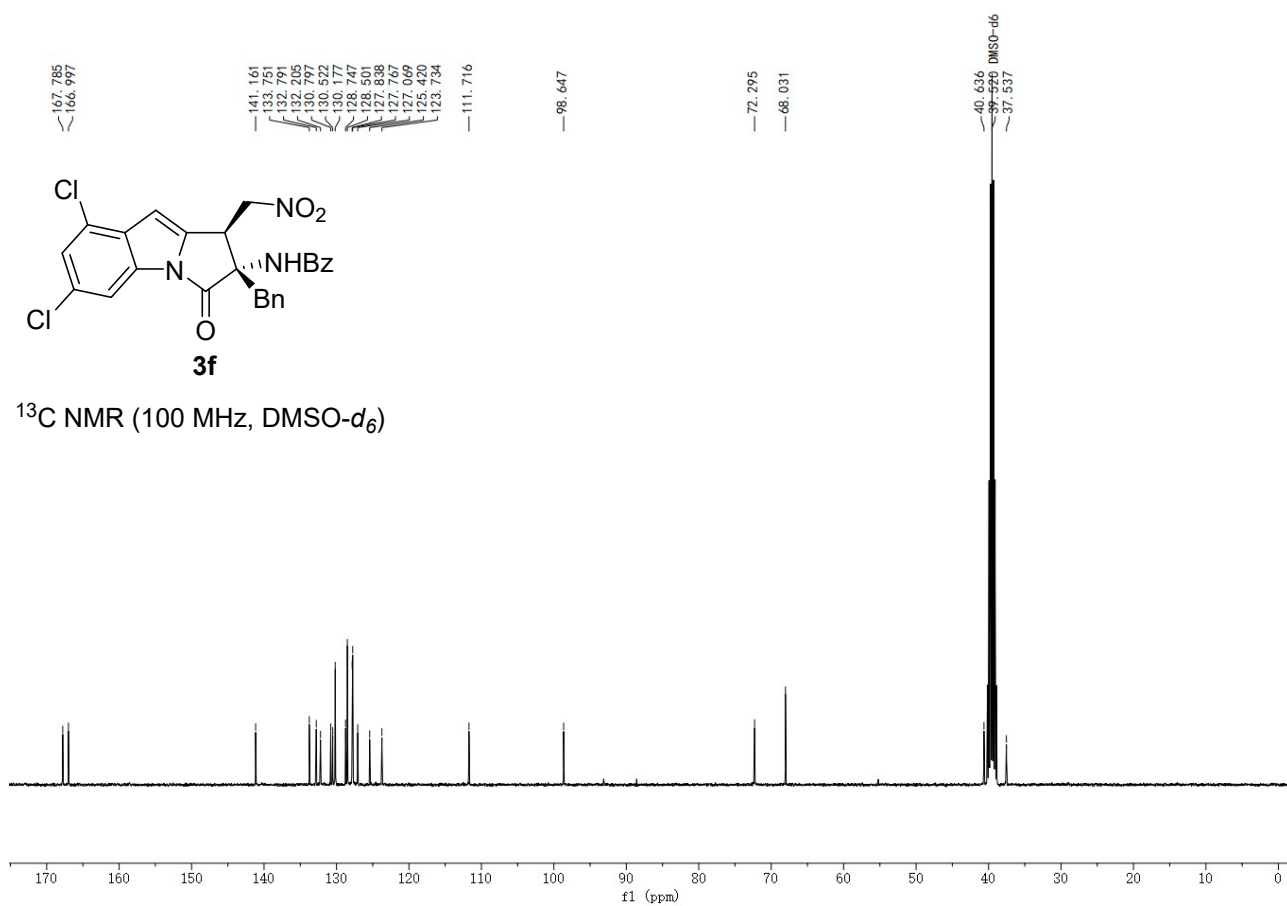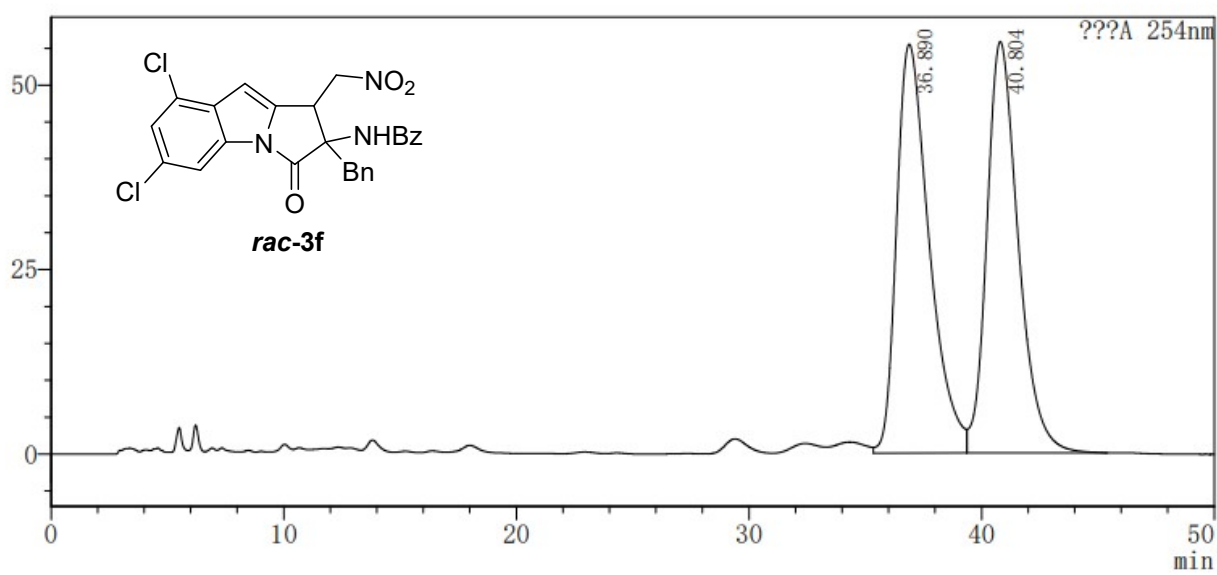

| Peak# | Ret. Time | Area     | Height | Area%   | Height% |
|-------|-----------|----------|--------|---------|---------|
| 1     | 36.890    | 5405214  | 55397  | 50.744  | 49.854  |
| 2     | 40.804    | 5246772  | 55720  | 49.256  | 50.146  |
| Total |           | 10651987 | 111117 | 100.000 | 100.000 |

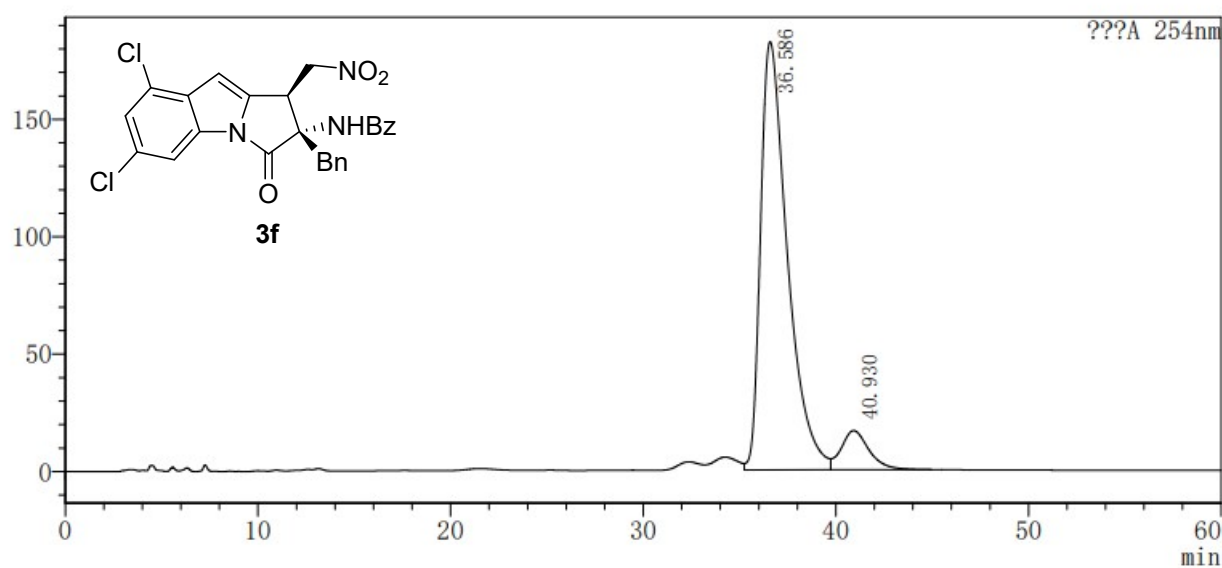

| Peak# | Ret. Time | Area     | Height | Area%   | Height% |
|-------|-----------|----------|--------|---------|---------|
| 1     | 36.586    | 17629978 | 182441 | 91.293  | 91.616  |
| 2     | 40.930    | 1681371  | 16695  | 8.707   | 8.384   |
| Total |           | 19311348 | 199137 | 100.000 | 100.000 |

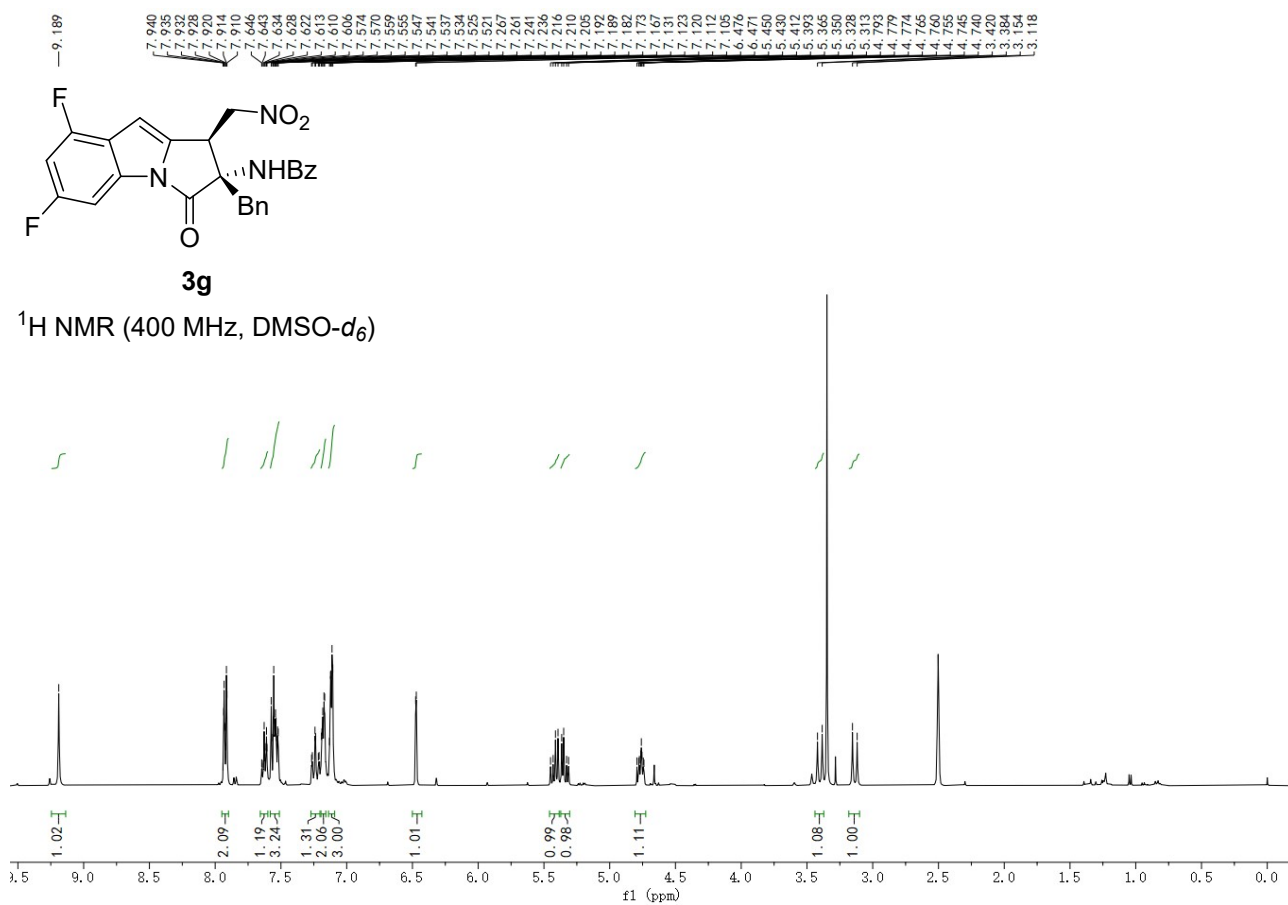

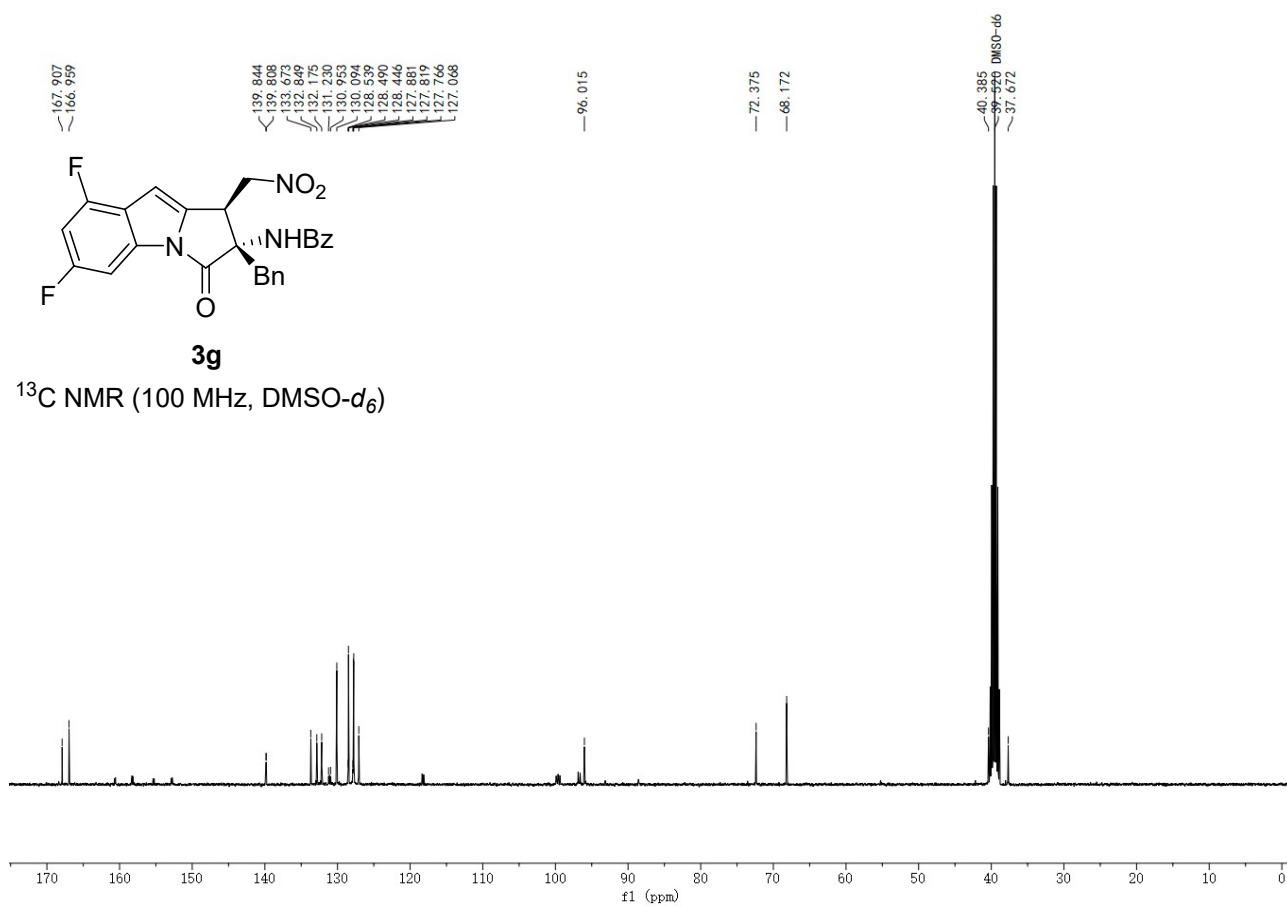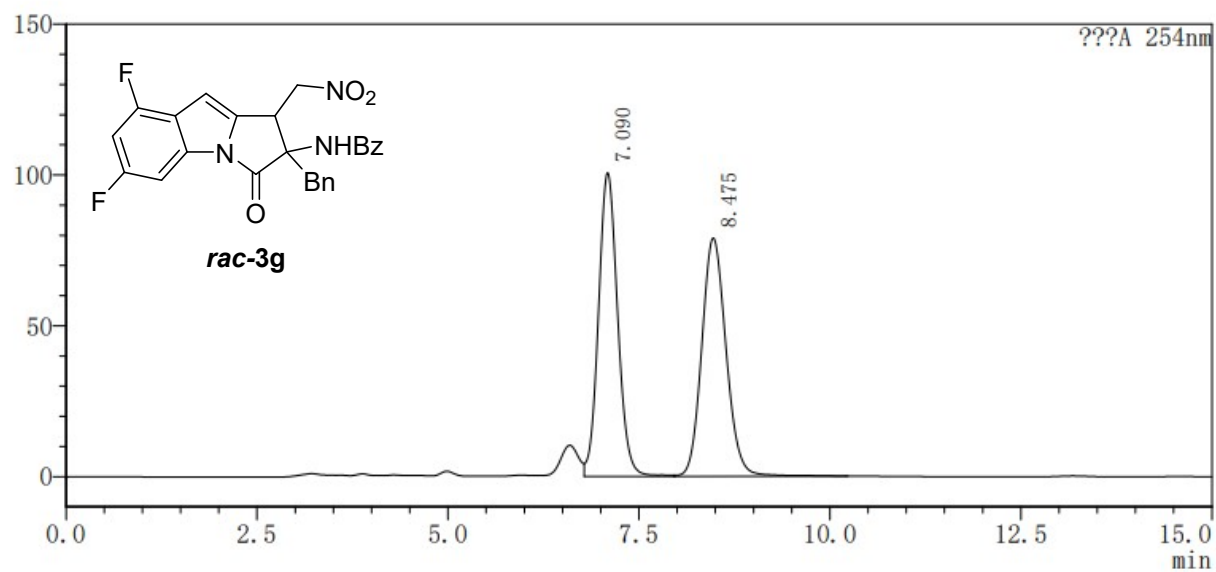

| Peak# | Ret. Time | Area    | Height | Area%   | Height% |
|-------|-----------|---------|--------|---------|---------|
| 1     | 7.090     | 1757626 | 100746 | 50.073  | 56.028  |
| 2     | 8.475     | 1752505 | 79069  | 49.927  | 43.972  |
| Total |           | 3510130 | 179814 | 100.000 | 100.000 |

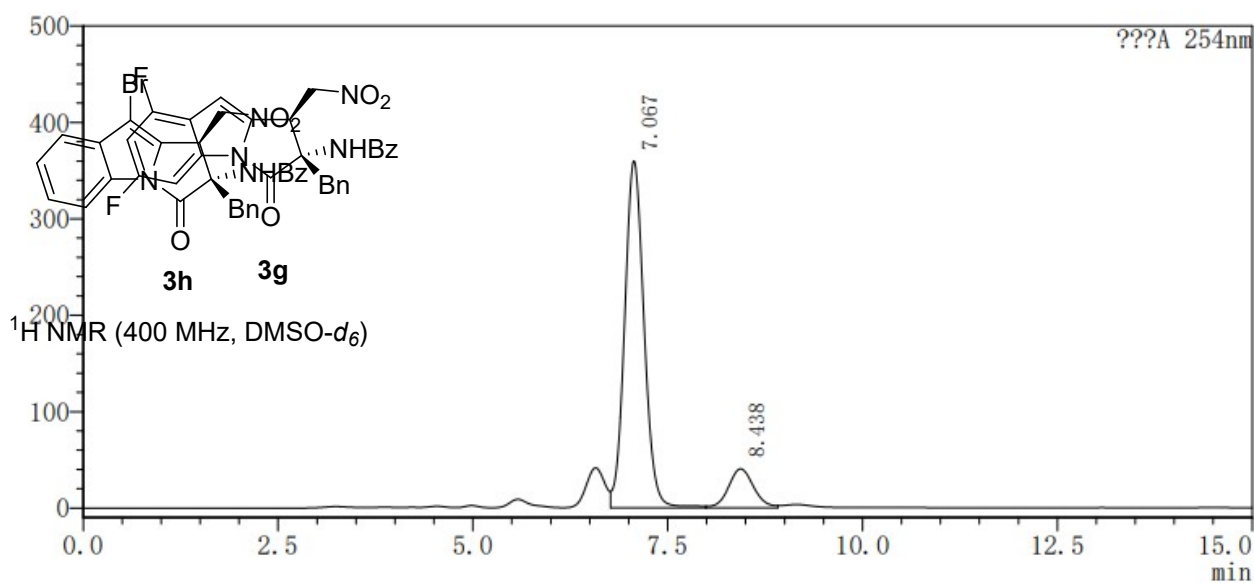

| Peak# | Ret. Time | Area    | Height | Area%   | Height% |
|-------|-----------|---------|--------|---------|---------|
| 1     | 7.067     | 6235478 | 360113 | 87.190  | 89.876  |
| 2     | 8.438     | 916139  | 40564  | 12.810  | 10.124  |
| Total |           | 7151616 | 400677 | 100.000 | 100.000 |

9.208

7.988  
7.952  
7.940  
7.936  
7.932  
7.660  
7.656  
7.653  
7.644  
7.638  
7.632  
7.623  
7.619  
7.616  
7.582  
7.567  
7.563  
7.560  
7.548  
7.542  
7.488  
7.481  
7.474  
7.467  
7.462  
7.455  
7.447  
7.435  
7.429  
7.422  
7.419  
7.401  
7.172  
7.167  
7.157  
7.150  
7.073  
7.063  
7.057  
7.050  
7.046  
7.037  
6.472  
6.462  
4.999  
4.943  
4.927  
3.423  
3.256  
3.220

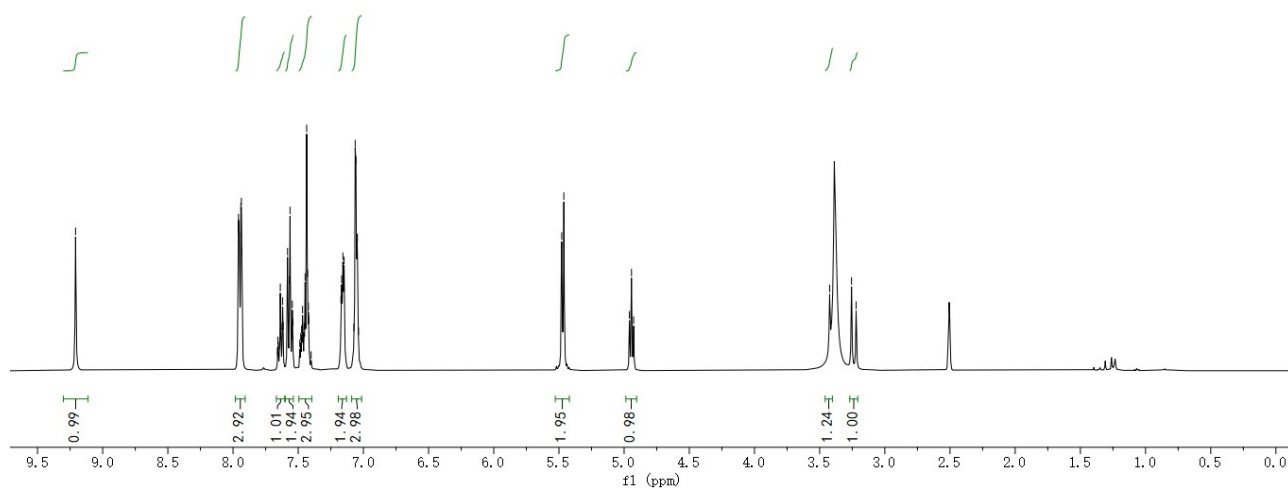

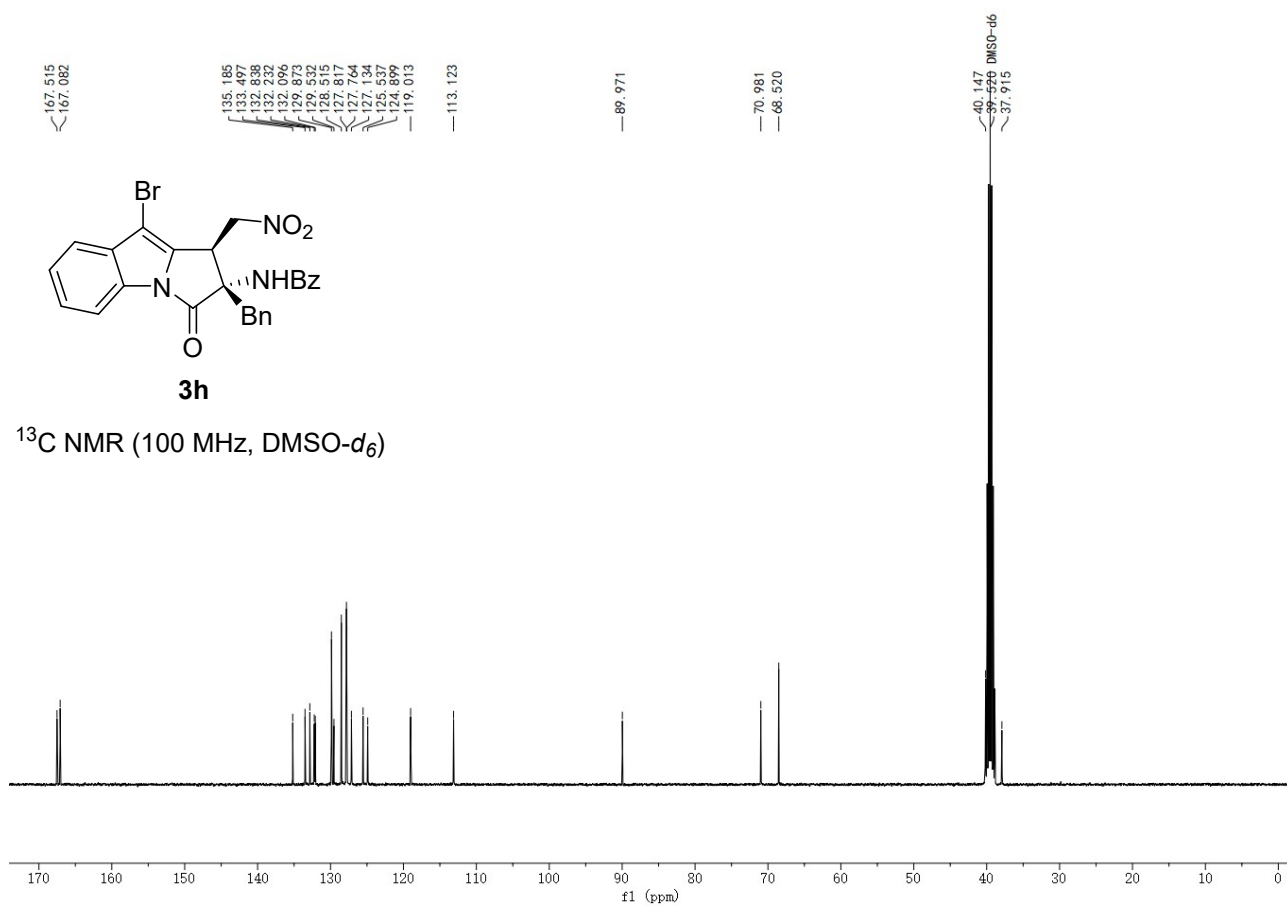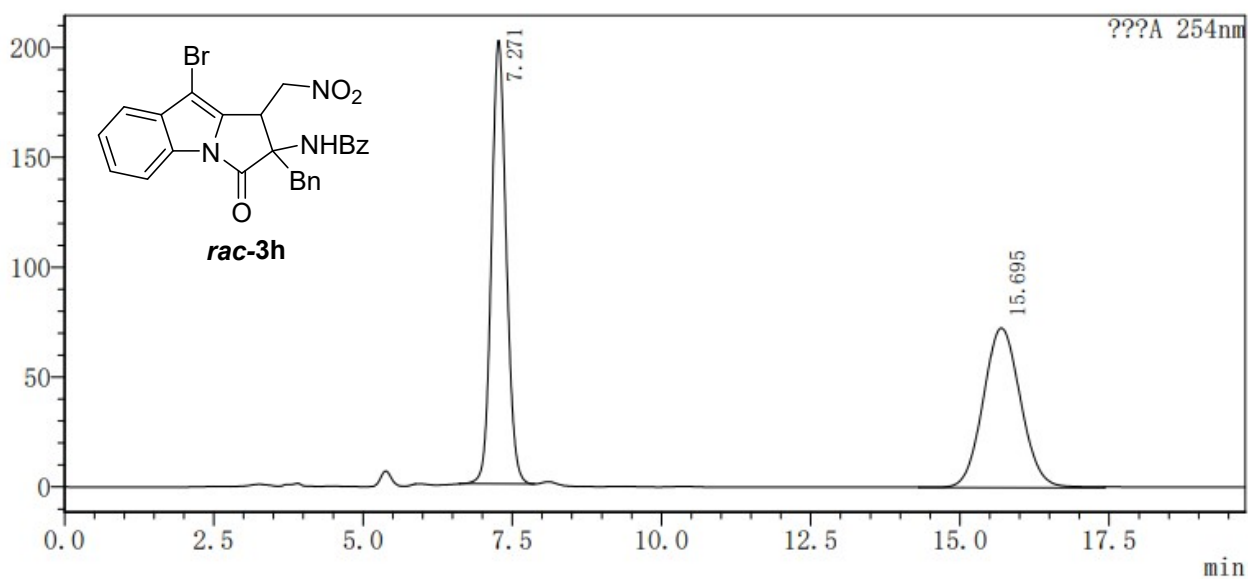

| Peak# | Ret. Time | Area    | Height | Area%   | Height% |
|-------|-----------|---------|--------|---------|---------|
| 1     | 7.271     | 3482425 | 201736 | 52.189  | 73.525  |
| 2     | 15.695    | 3190284 | 72642  | 47.811  | 26.475  |
| Total |           | 6672709 | 274379 | 100.000 | 100.000 |

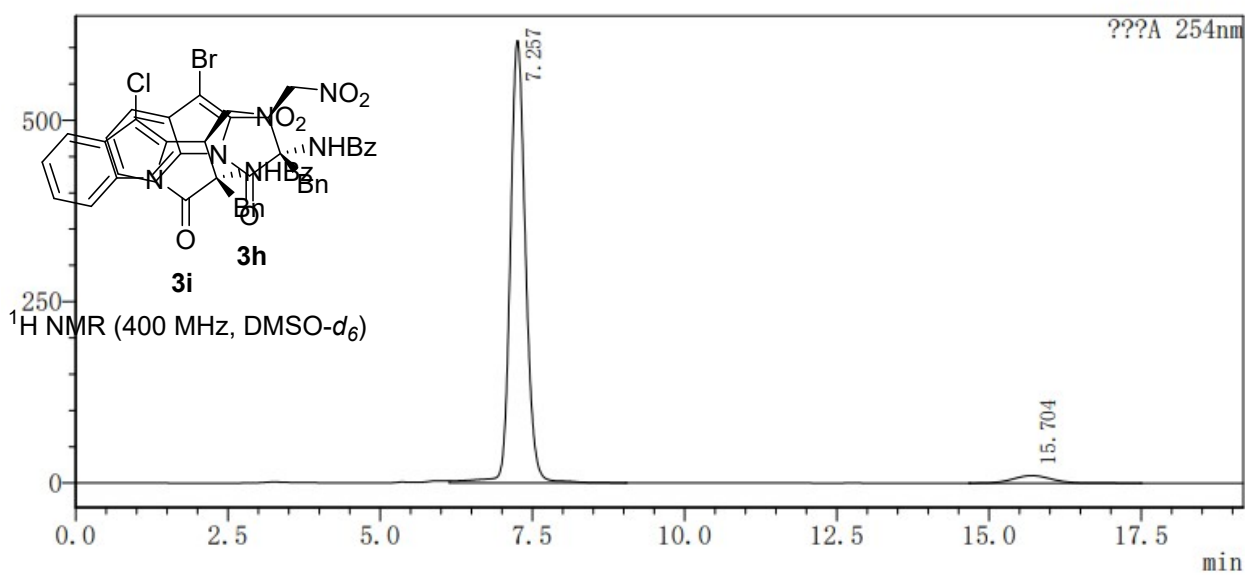

| Peak# | Ret. Time | Area     | Height | Area%   | Height% |
|-------|-----------|----------|--------|---------|---------|
| 1     | 7.257     | 10663626 | 609506 | 95.961  | 98.346  |
| 2     | 15.704    | 448884   | 10249  | 4.039   | 1.654   |
| Total |           | 11112510 | 619755 | 100.000 | 100.000 |

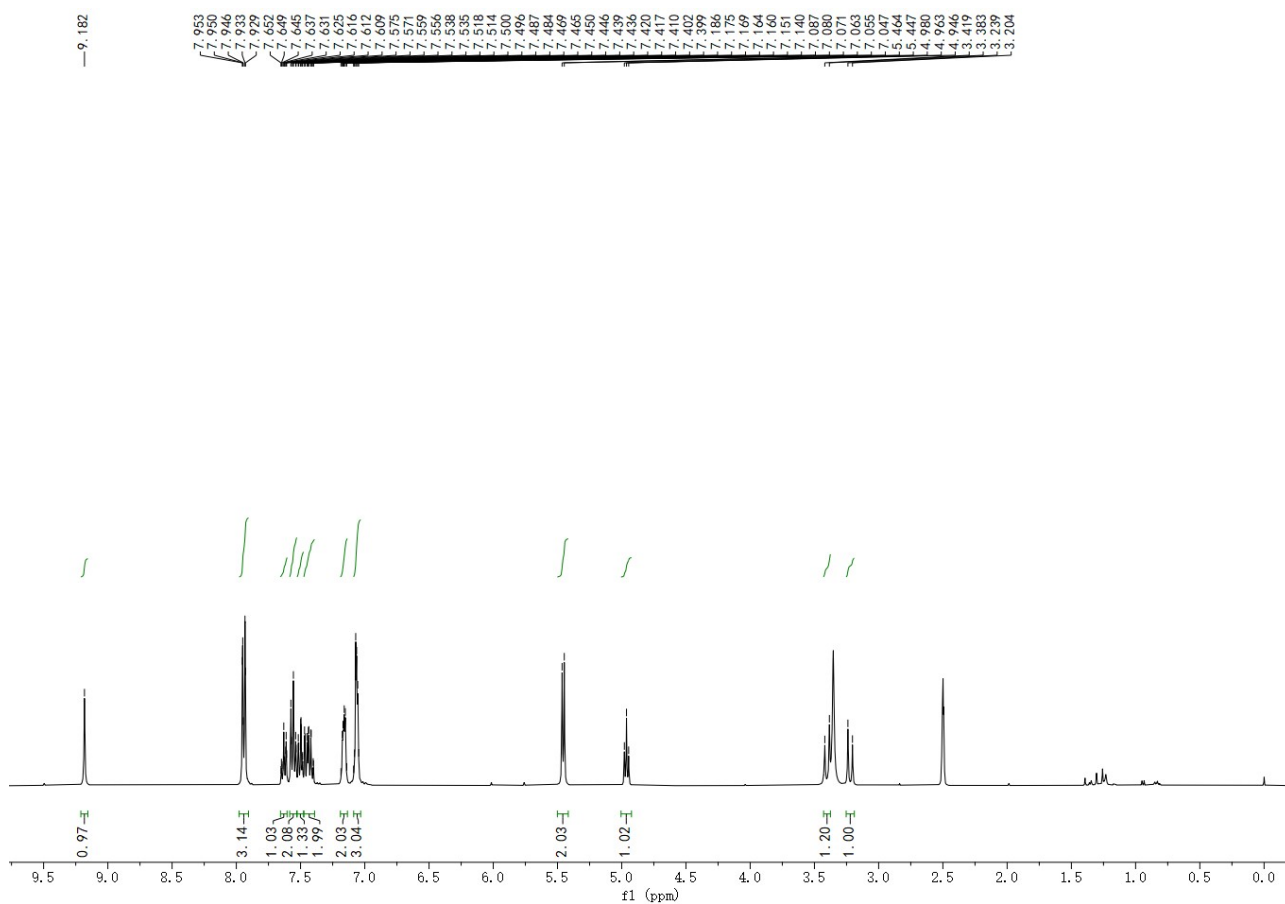

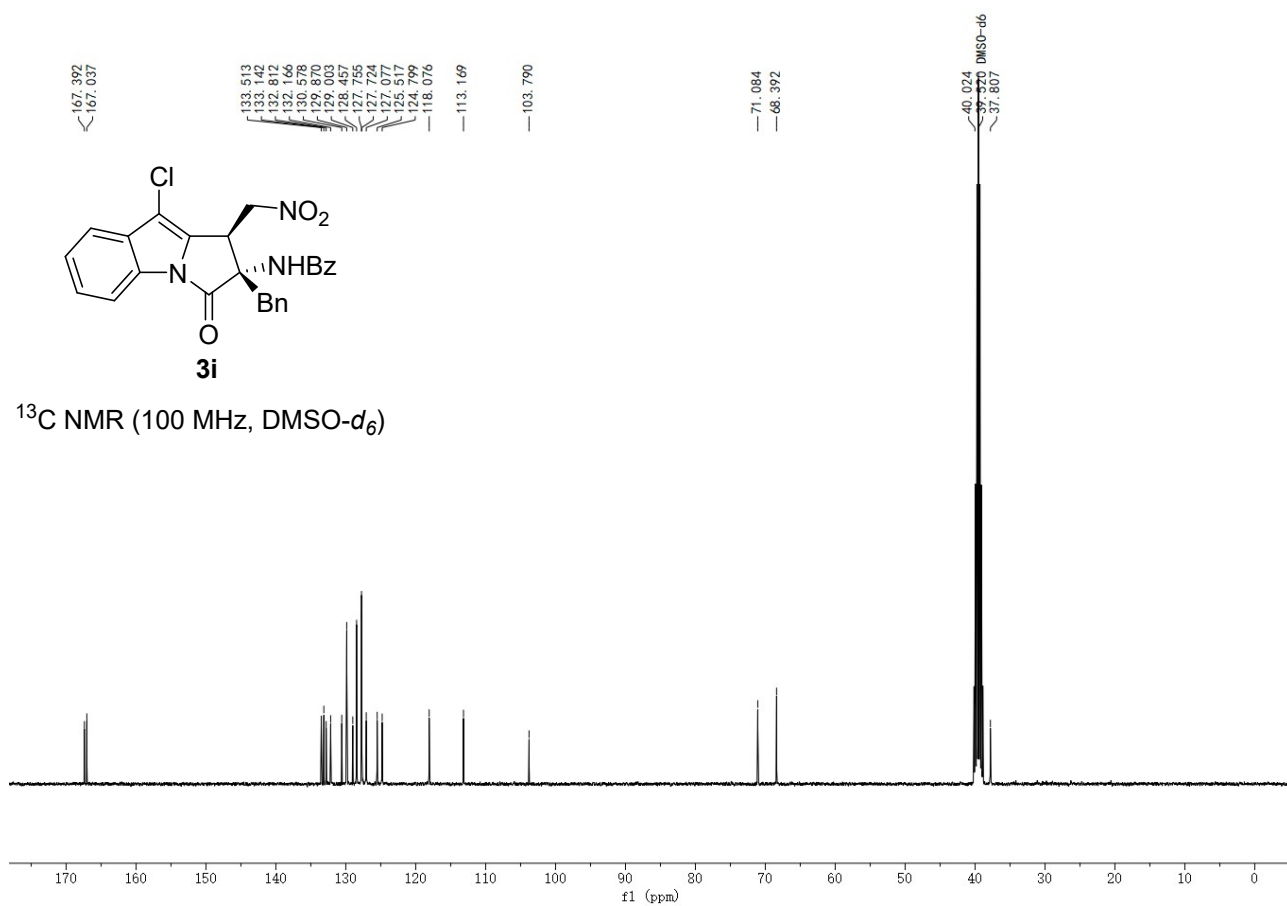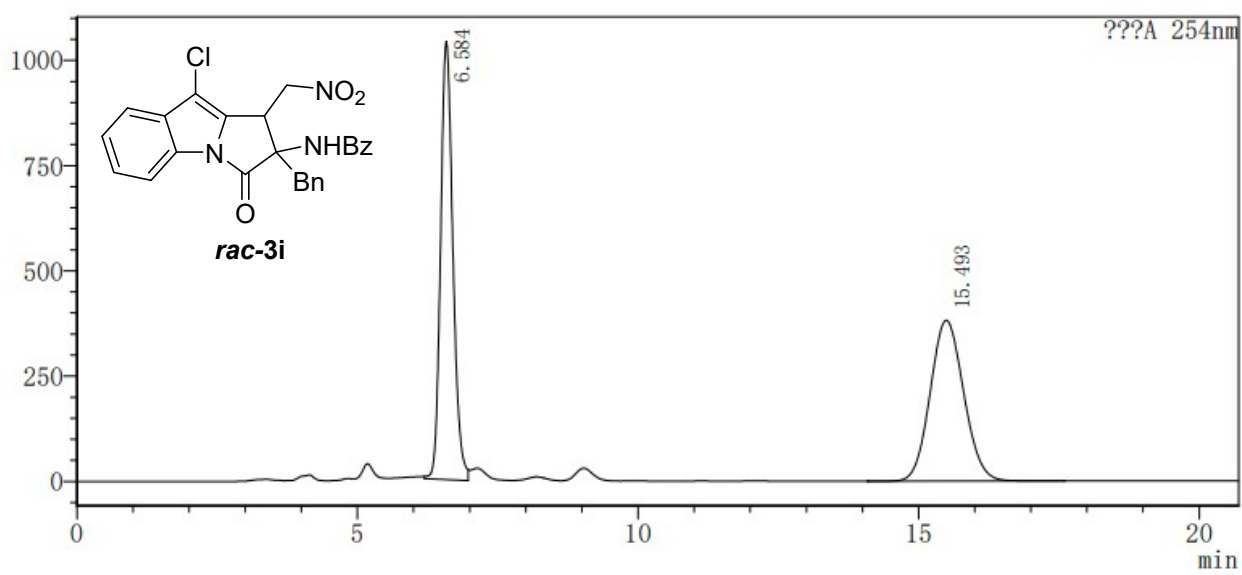

| Peak# | Ret. Time | Area     | Height  | Area%   | Height% |
|-------|-----------|----------|---------|---------|---------|
| 1     | 6.584     | 15818411 | 1040873 | 49.861  | 73.140  |
| 2     | 15.493    | 15906326 | 382258  | 50.139  | 26.860  |
| Total |           | 31724736 | 1423131 | 100.000 | 100.000 |

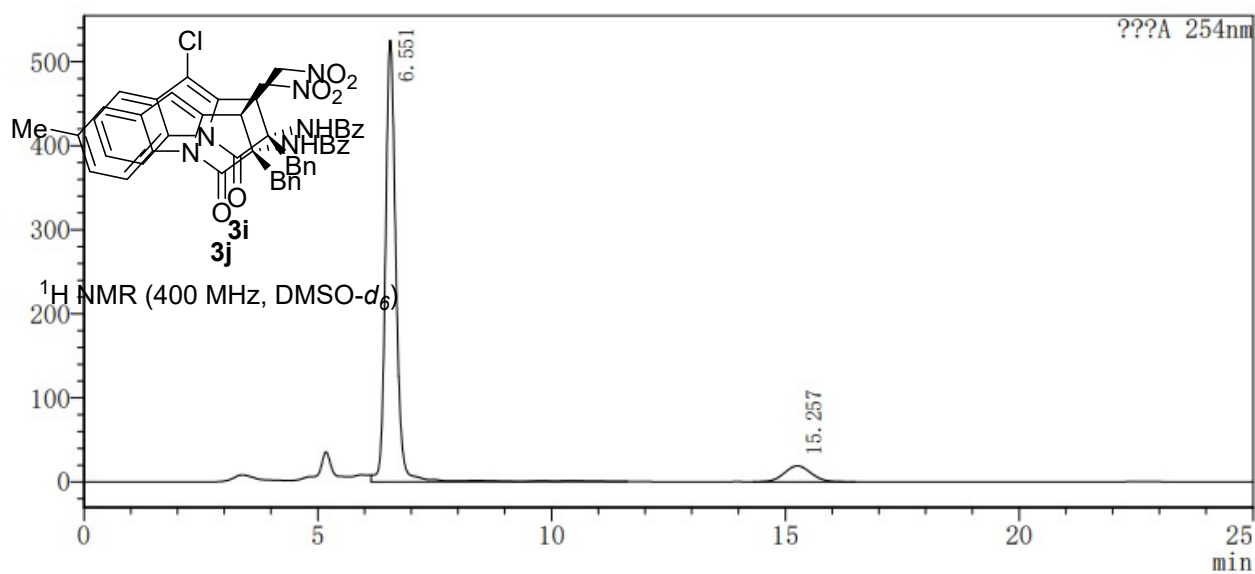

| Peak# | Ret. Time | Area    | Height | Area%   | Height% |
|-------|-----------|---------|--------|---------|---------|
| 1     | 6.551     | 8270088 | 525103 | 91.699  | 96.526  |
| 2     | 15.257    | 748628  | 18897  | 8.301   | 3.474   |
| Total |           | 9018717 | 544000 | 100.000 | 100.000 |

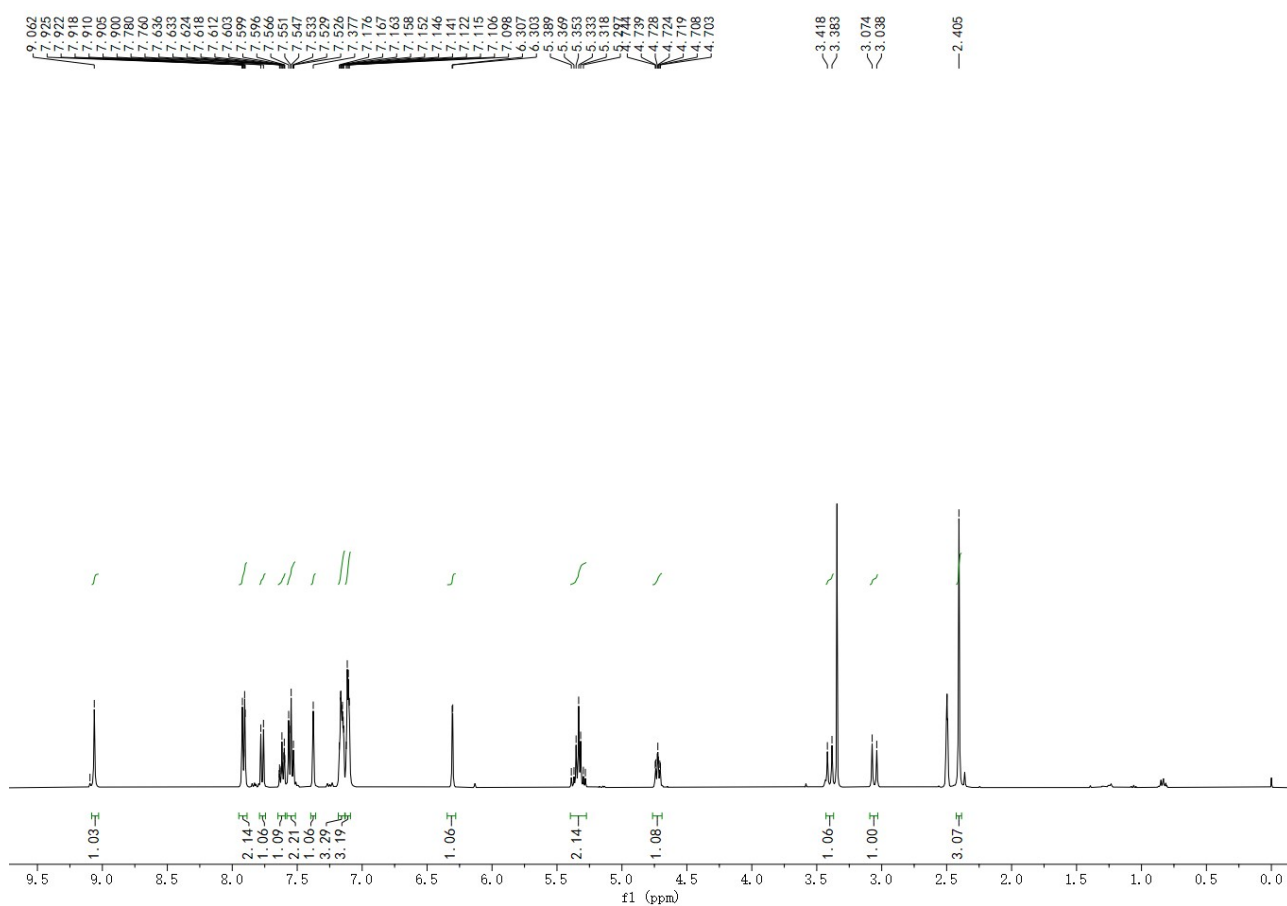

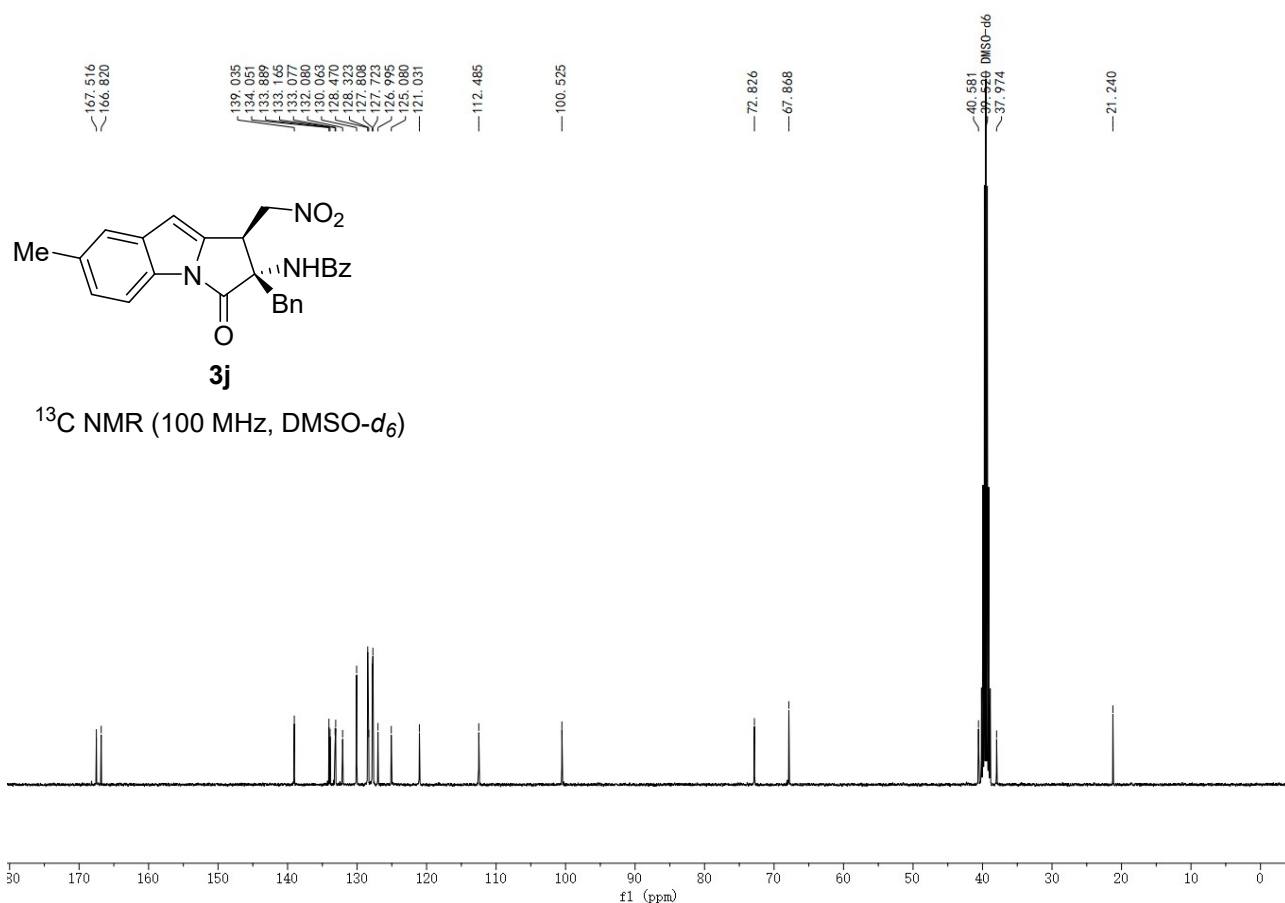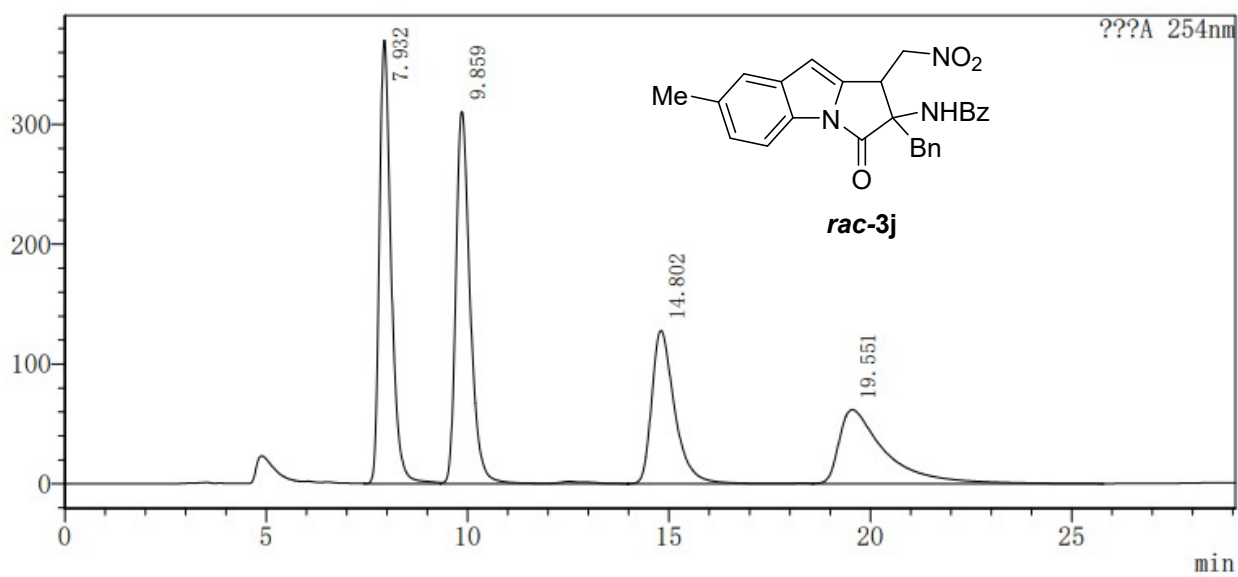

| Peak# | Ret. Time | Area     | Height | Area%   | Height% |
|-------|-----------|----------|--------|---------|---------|
| 1     | 7.932     | 7541182  | 370201 | 29.884  | 42.528  |
| 2     | 9.859     | 7727972  | 310760 | 30.624  | 35.700  |
| 3     | 14.802    | 5071759  | 127784 | 20.098  | 14.680  |
| 4     | 19.551    | 4893791  | 61737  | 19.393  | 7.092   |
| Total |           | 25234703 | 870482 | 100.000 | 100.000 |

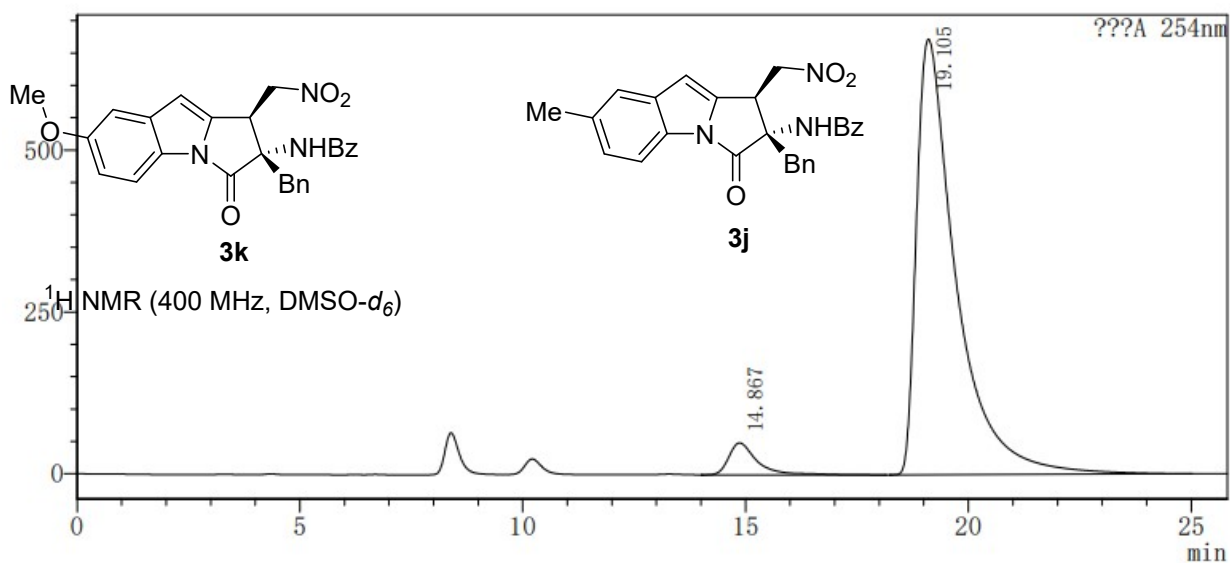

| Peak# | Ret. Time | Area     | Height | Area%   | Height% |
|-------|-----------|----------|--------|---------|---------|
| 1     | 14.867    | 2188817  | 49373  | 5.002   | 6.836   |
| 2     | 19.105    | 41569543 | 672841 | 94.998  | 93.164  |
| Total |           | 43758359 | 722215 | 100.000 | 100.000 |

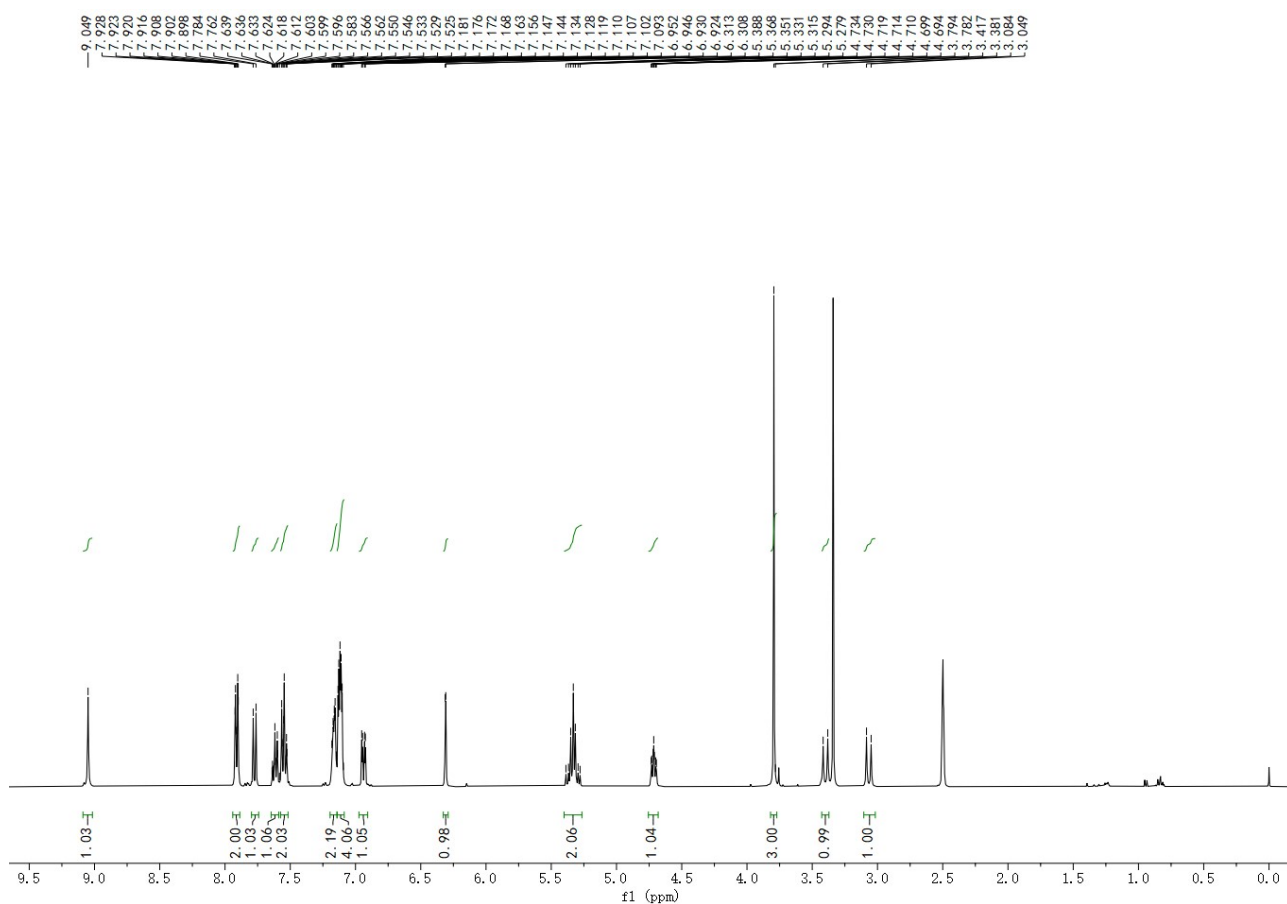

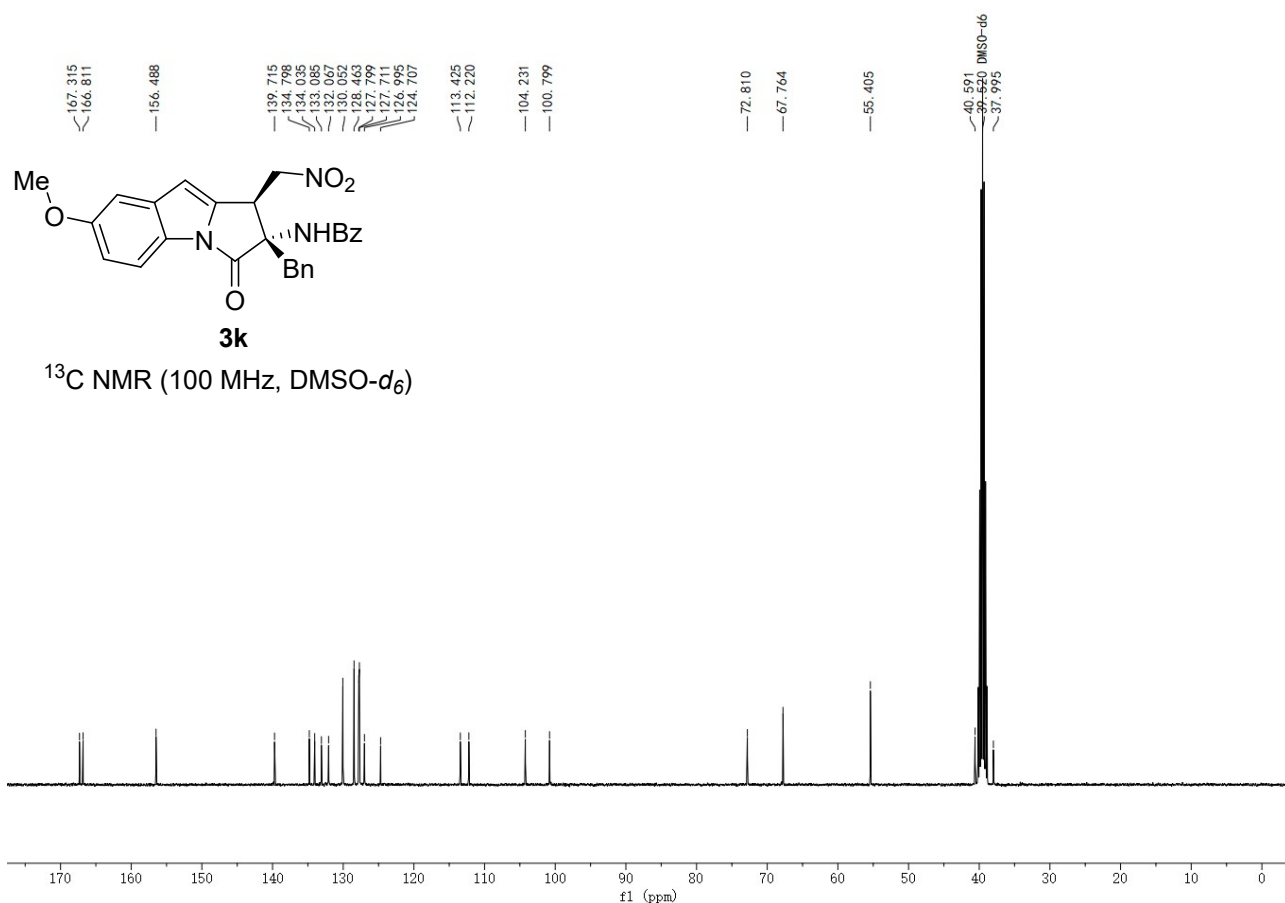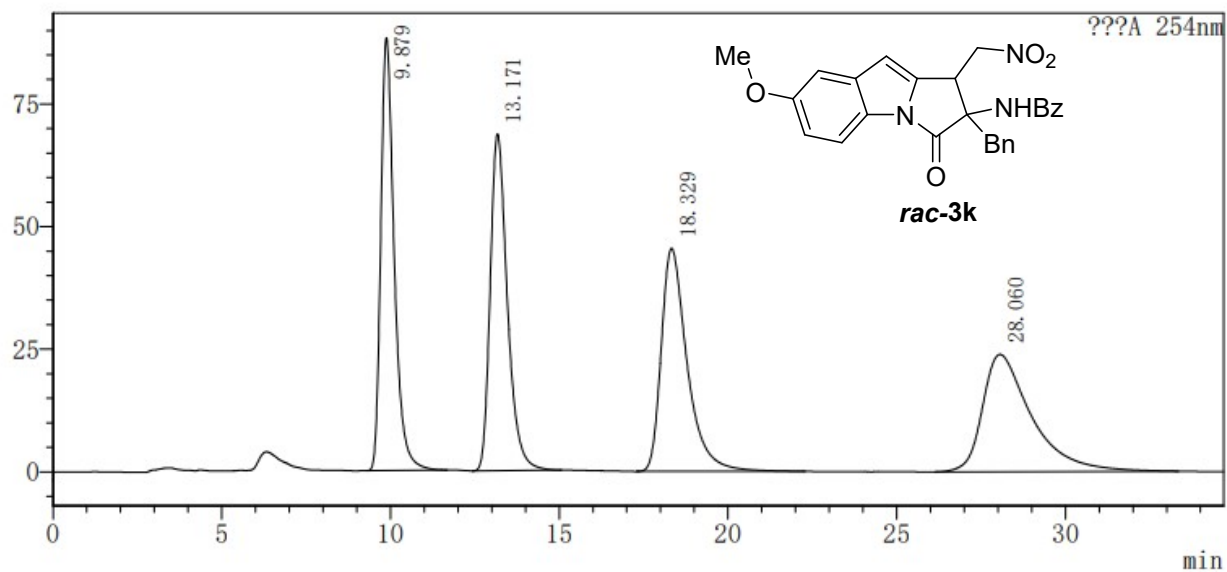

| Peak# | Ret. Time | Area    | Height | Area%   | Height% |
|-------|-----------|---------|--------|---------|---------|
| 1     | 9.879     | 2437509 | 88205  | 25.101  | 38.982  |
| 2     | 13.171    | 2421916 | 68651  | 24.941  | 30.340  |
| 3     | 18.329    | 2433534 | 45505  | 25.061  | 20.111  |
| 4     | 28.060    | 2417673 | 23909  | 24.897  | 10.566  |
| Total |           | 9710632 | 226269 | 100.000 | 100.000 |

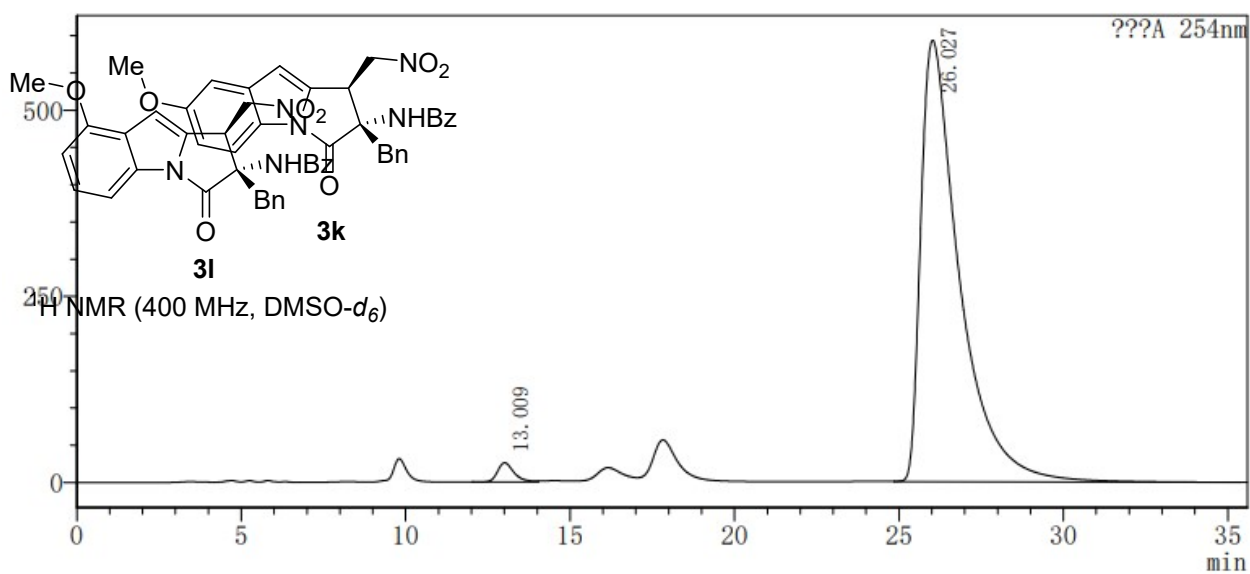

| Peak# | Ret. Time | Area     | Height | Area%   | Height% |
|-------|-----------|----------|--------|---------|---------|
| 1     | 13.009    | 912080   | 25906  | 1.845   | 4.187   |
| 2     | 26.027    | 48516223 | 592810 | 98.155  | 95.813  |
| Total |           | 49428303 | 618717 | 100.000 | 100.000 |

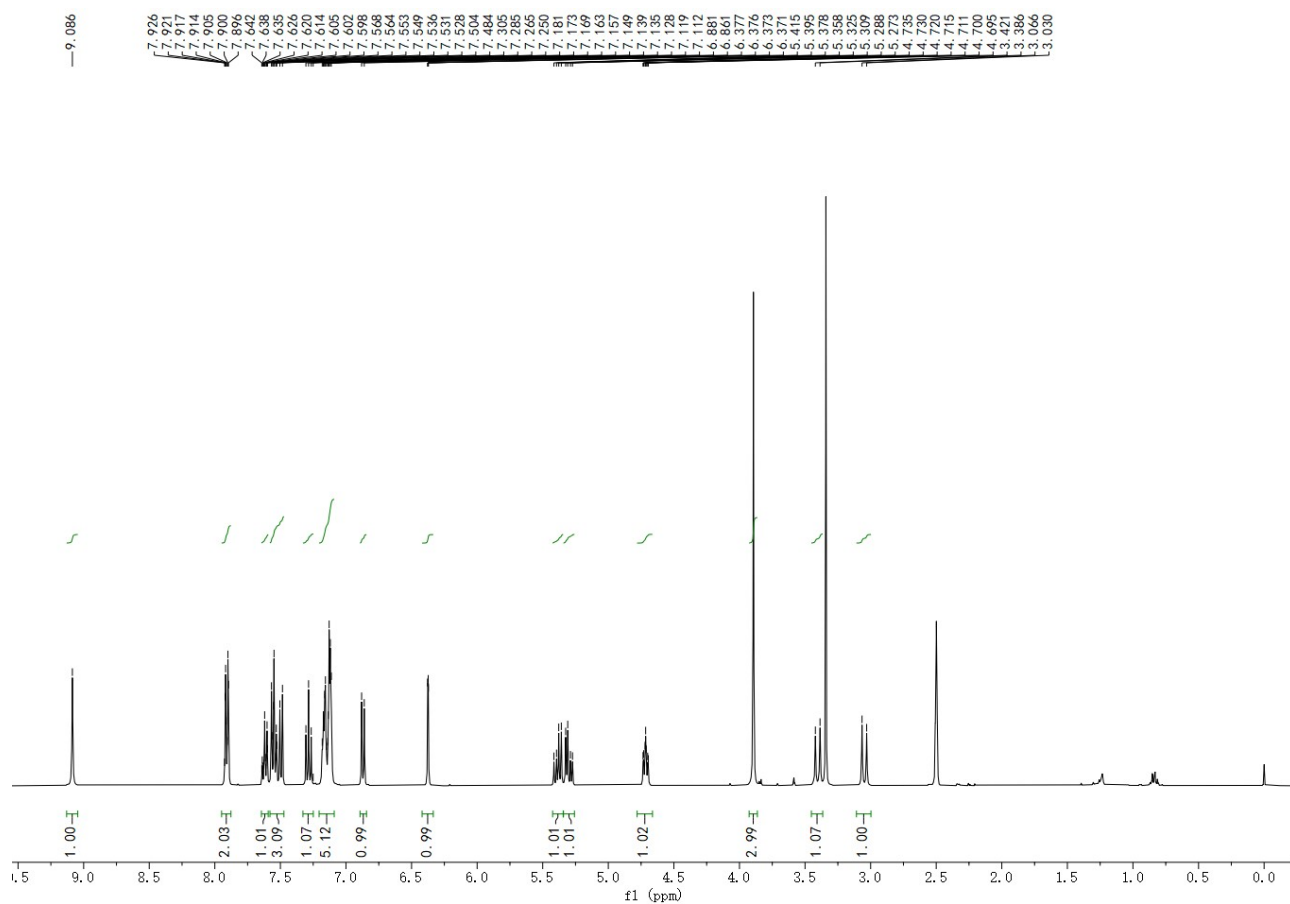

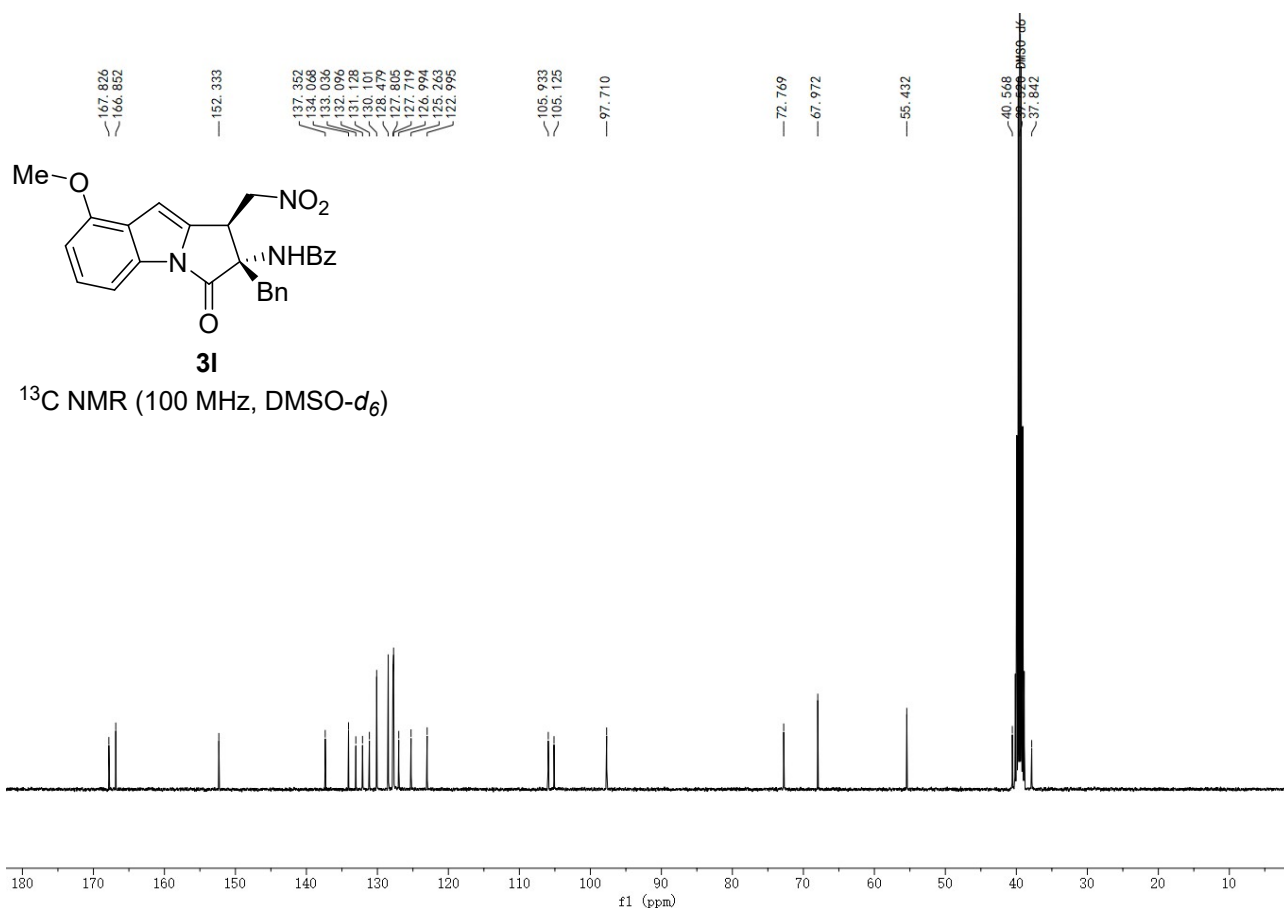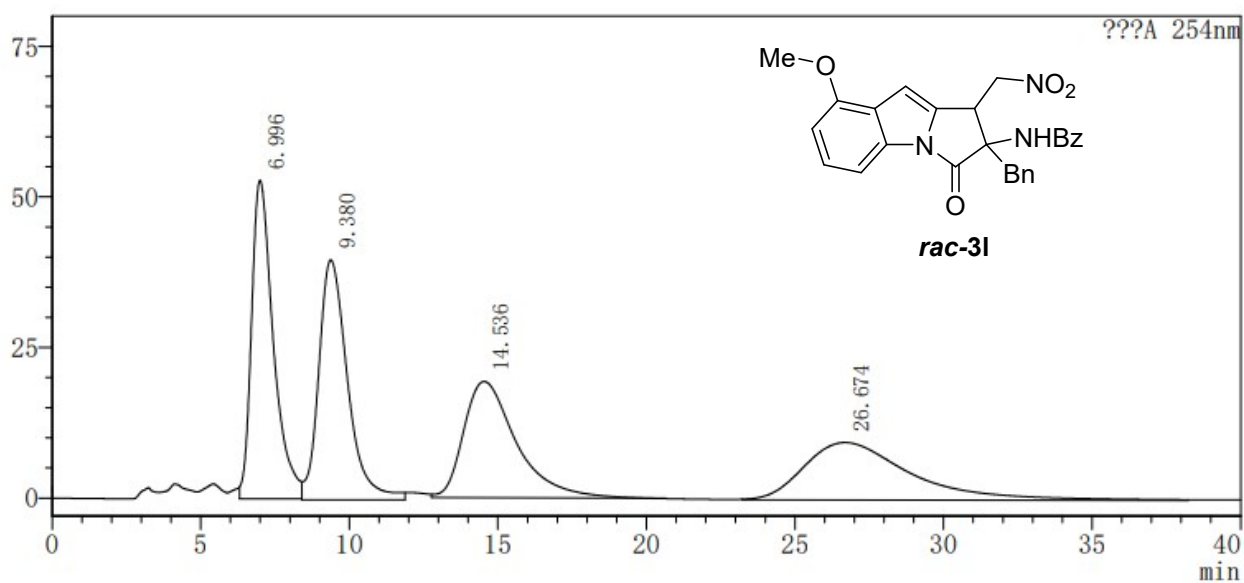

| Peak# | Ret. Time | Area     | Height | Area%   | Height% |
|-------|-----------|----------|--------|---------|---------|
| 1     | 6.996     | 2700511  | 52920  | 26.652  | 43.545  |
| 2     | 9.380     | 2680103  | 39811  | 26.451  | 32.758  |
| 3     | 14.536    | 2373661  | 19281  | 23.426  | 15.865  |
| 4     | 26.674    | 2378161  | 9517   | 23.471  | 7.831   |
| Total |           | 10132435 | 121528 | 100.000 | 100.000 |

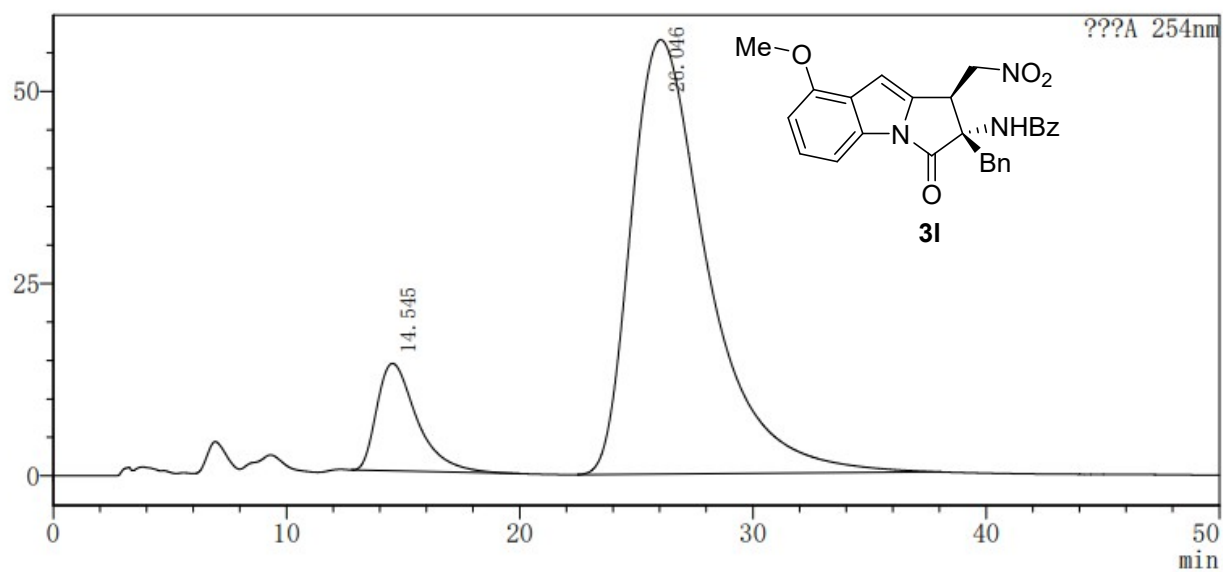

| Peak# | Ret. Time | Area     | Height | Area%   | Height% |
|-------|-----------|----------|--------|---------|---------|
| 1     | 14.545    | 1675133  | 13968  | 11.488  | 19.827  |
| 2     | 26.046    | 12906780 | 56481  | 88.512  | 80.173  |
| Total |           | 14581913 | 70449  | 100.000 | 100.000 |

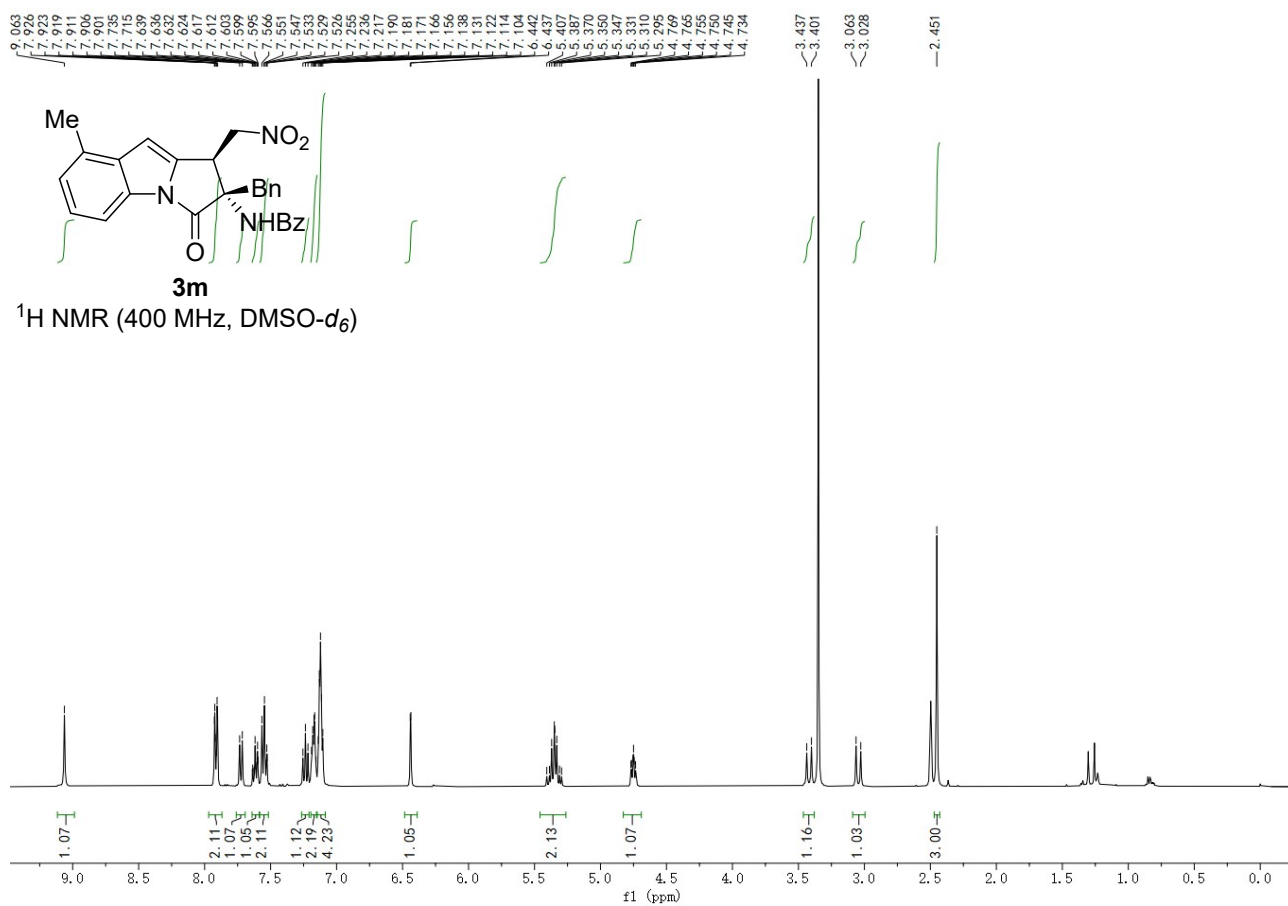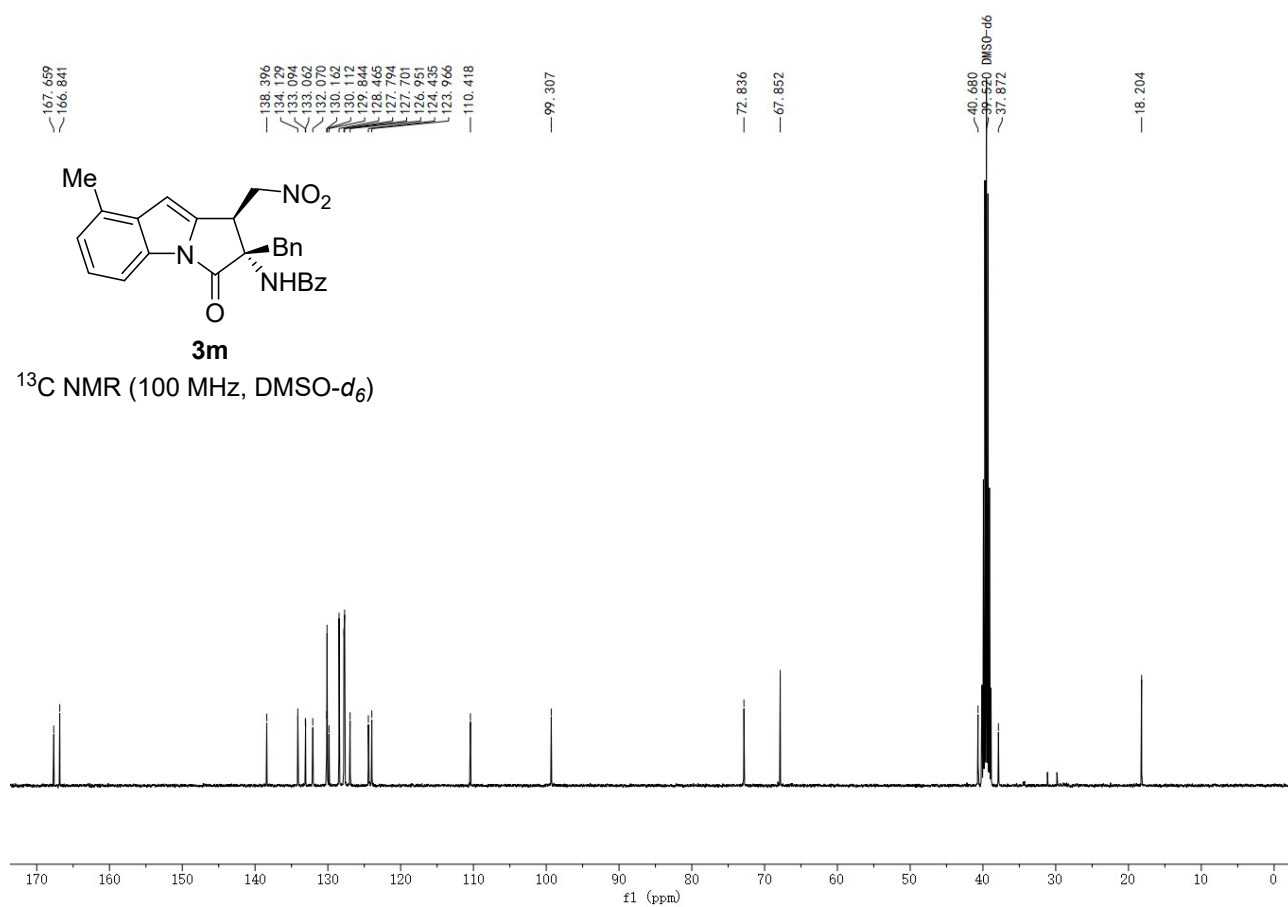

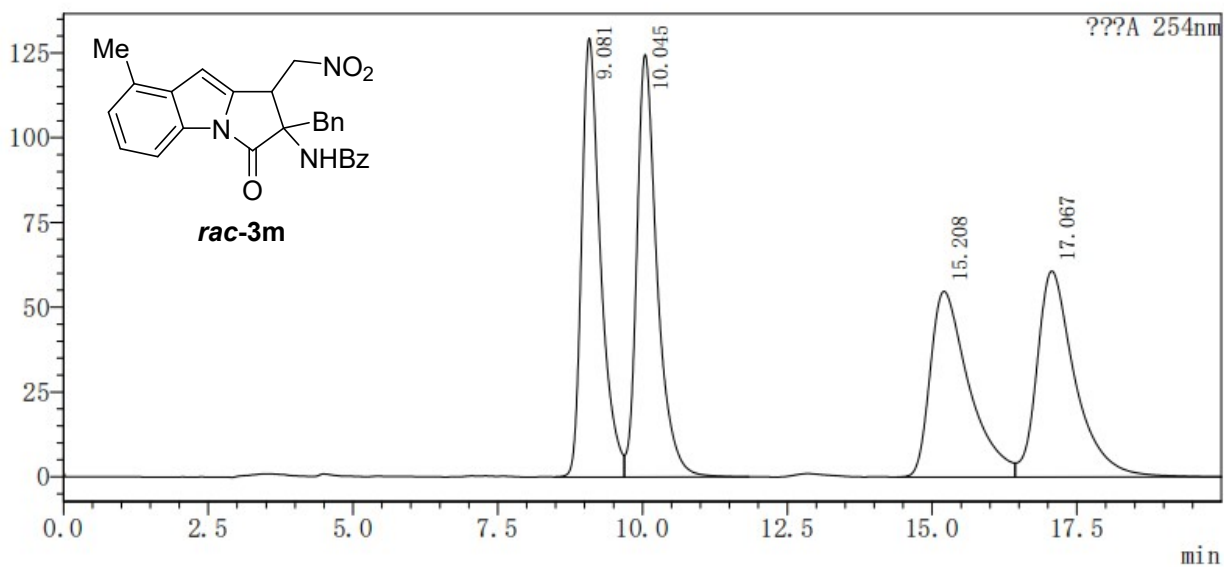

| Peak# | Ret. Time | Area     | Height | Area%   | Height% |
|-------|-----------|----------|--------|---------|---------|
| 1     | 9.081     | 2937392  | 129402 | 26.001  | 35.021  |
| 2     | 10.045    | 3041186  | 124594 | 26.920  | 33.720  |
| 3     | 15.208    | 2544878  | 54755  | 22.527  | 14.819  |
| 4     | 17.067    | 2773711  | 60748  | 24.552  | 16.441  |
| Total |           | 11297167 | 369499 | 100.000 | 100.000 |

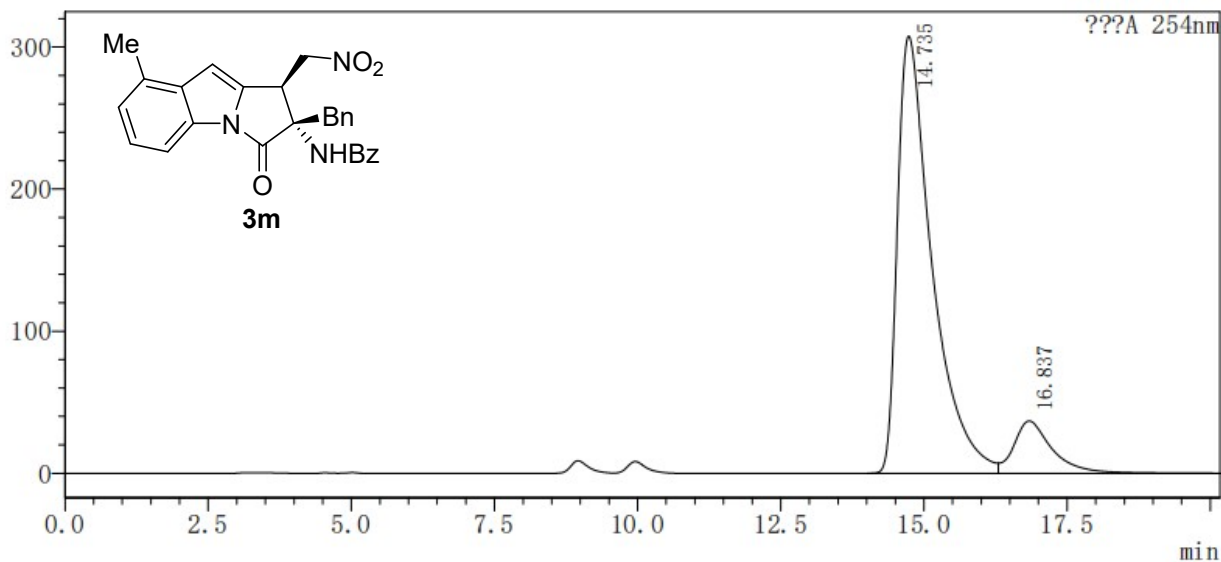

| Peak# | Ret. Time | Area     | Height | Area%   | Height% |
|-------|-----------|----------|--------|---------|---------|
| 1     | 14.735    | 12928410 | 307740 | 88.254  | 89.313  |
| 2     | 16.837    | 1720734  | 36822  | 11.746  | 10.687  |
| Total |           | 14649143 | 344562 | 100.000 | 100.000 |

9.010  
7.904  
7.899  
7.896  
7.892  
7.883  
7.878  
7.874  
7.866  
7.860  
7.847  
7.843  
7.835  
7.830  
7.826  
7.589  
7.583  
7.544  
7.540  
7.533  
7.529  
7.522  
7.518  
7.514  
7.500  
7.496  
7.493  
7.198  
7.188  
7.177  
7.172  
7.079  
7.077  
7.068  
6.309  
6.301  
6.293  
5.760  
5.756  
5.752  
5.748  
5.745  
5.003  
4.988  
4.966  
4.951  
4.656  
4.633  
4.619  
4.595  
4.591  
4.317  
4.314  
4.302  
4.299  
4.294  
4.290  
4.279  
4.277  
3.365  
3.372

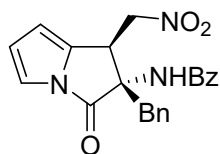

**3n**

<sup>1</sup>H NMR (400 MHz, DMSO-*d*<sub>6</sub>)

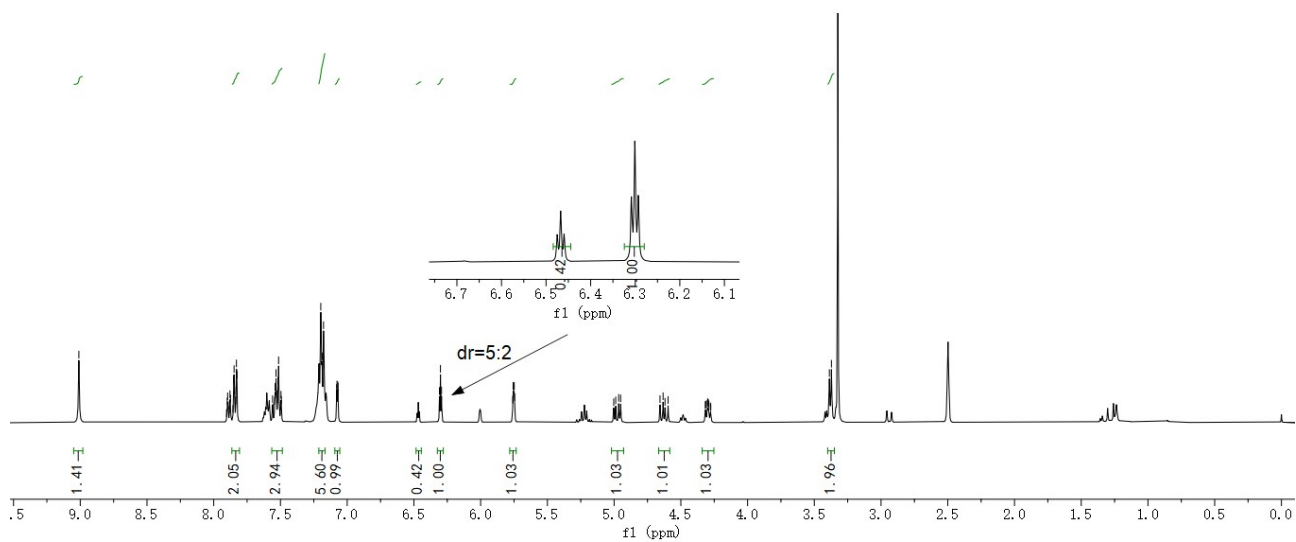

169.807  
168.031

134.337  
133.109  
132.688  
132.088  
129.945  
128.336  
127.771  
127.639  
127.487

118.554

111.793

104.758

74.076

67.916

42.522  
39.520 DMSO-*d*<sub>6</sub>  
38.412

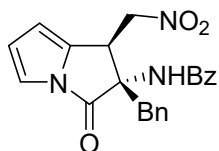

**3n**

<sup>13</sup>C NMR (100 MHz, DMSO-*d*<sub>6</sub>)

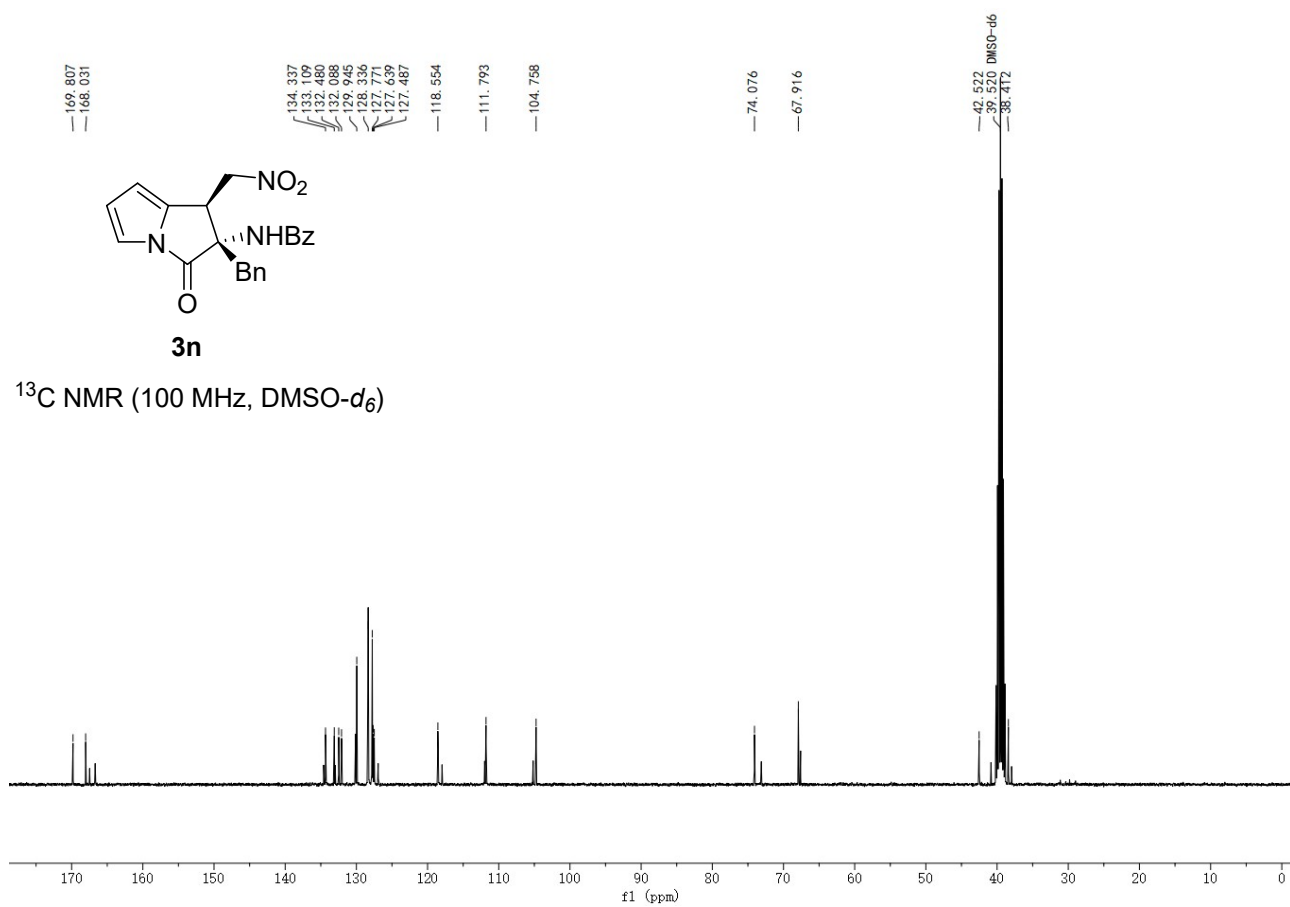

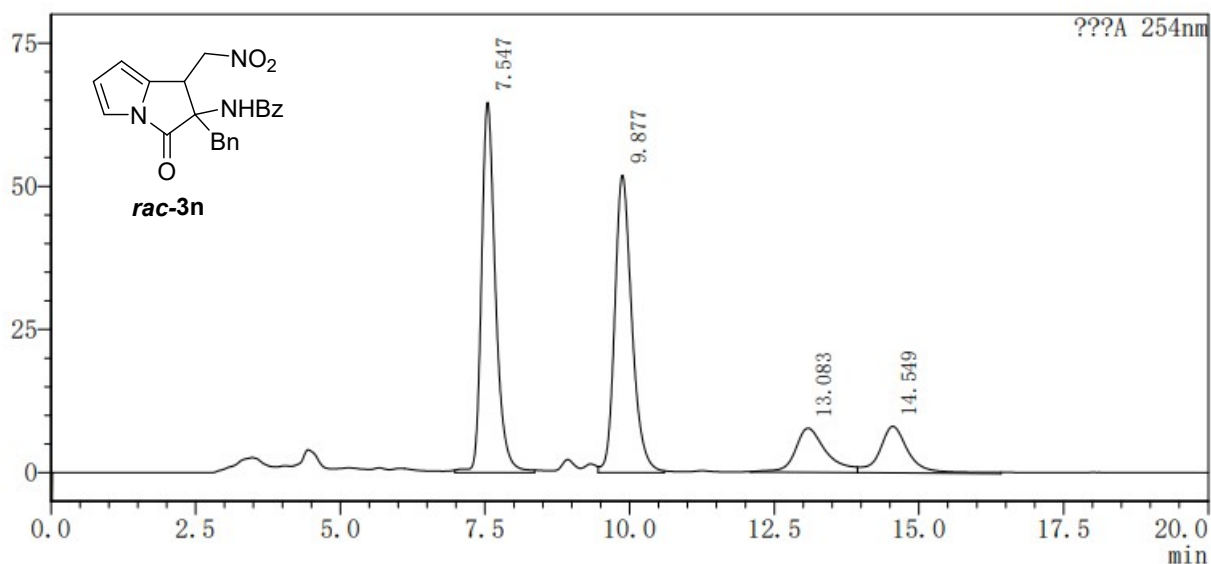

| Peak# | Ret. Time | Area    | Height | Area%   | Height% |
|-------|-----------|---------|--------|---------|---------|
| 1     | 7.547     | 1088138 | 64625  | 39.969  | 48.831  |
| 2     | 9.877     | 1064666 | 51916  | 39.107  | 39.228  |
| 3     | 13.083    | 286680  | 7700   | 10.530  | 5.819   |
| 4     | 14.549    | 282966  | 8102   | 10.394  | 6.122   |
| Total |           | 2722451 | 132344 | 100.000 | 100.000 |

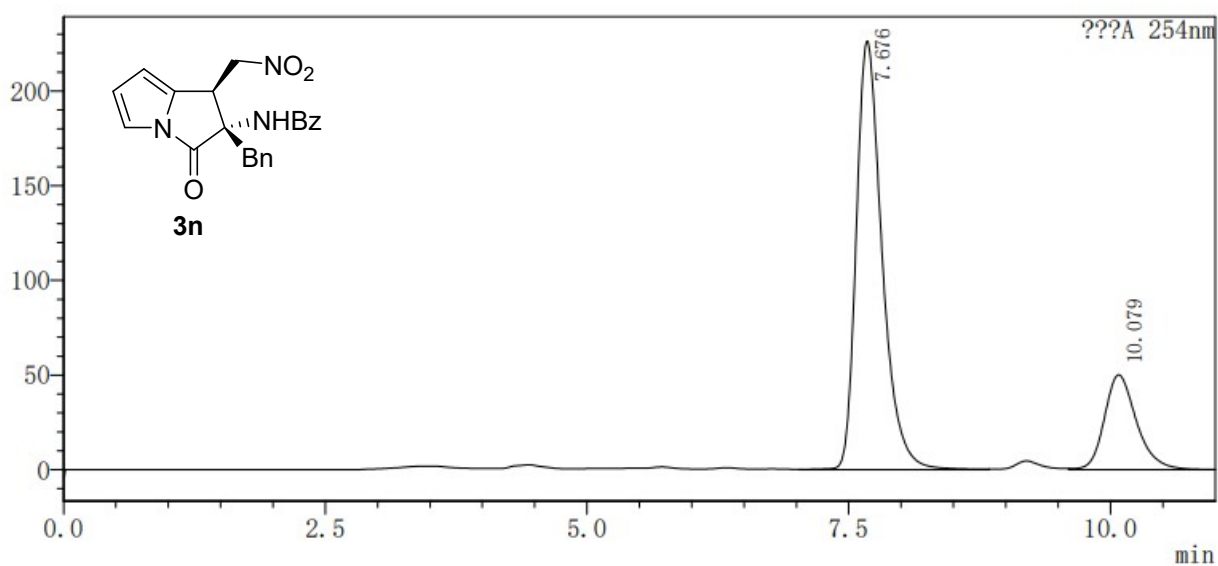

| Peak# | Ret. Time | Area    | Height | Area%   | Height% |
|-------|-----------|---------|--------|---------|---------|
| 1     | 7.676     | 3888855 | 226385 | 78.335  | 81.887  |
| 2     | 10.079    | 1075515 | 50075  | 21.665  | 18.113  |
| Total |           | 4964371 | 276460 | 100.000 | 100.000 |



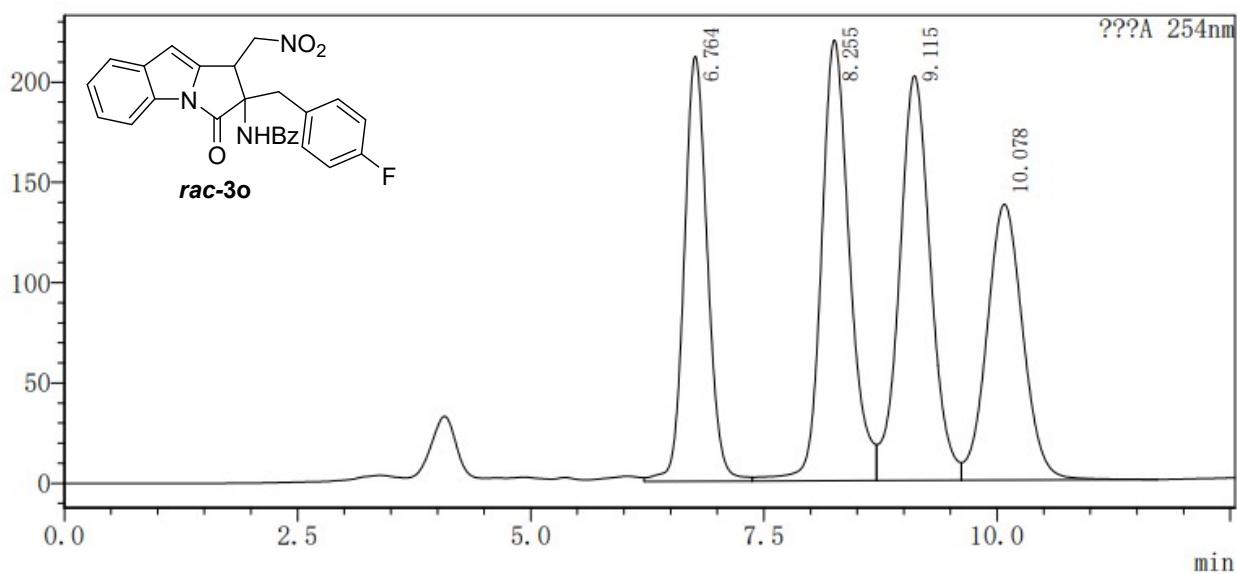

| Peak# | Ret. Time | Area     | Height | Area%   | Height% |
|-------|-----------|----------|--------|---------|---------|
| 1     | 6.764     | 3662934  | 211970 | 22.043  | 27.493  |
| 2     | 8.255     | 4613816  | 219688 | 27.765  | 28.494  |
| 3     | 9.115     | 4660447  | 201820 | 28.046  | 26.177  |
| 4     | 10.078    | 3680014  | 137507 | 22.146  | 17.835  |
| Total |           | 16617210 | 770985 | 100.000 | 100.000 |

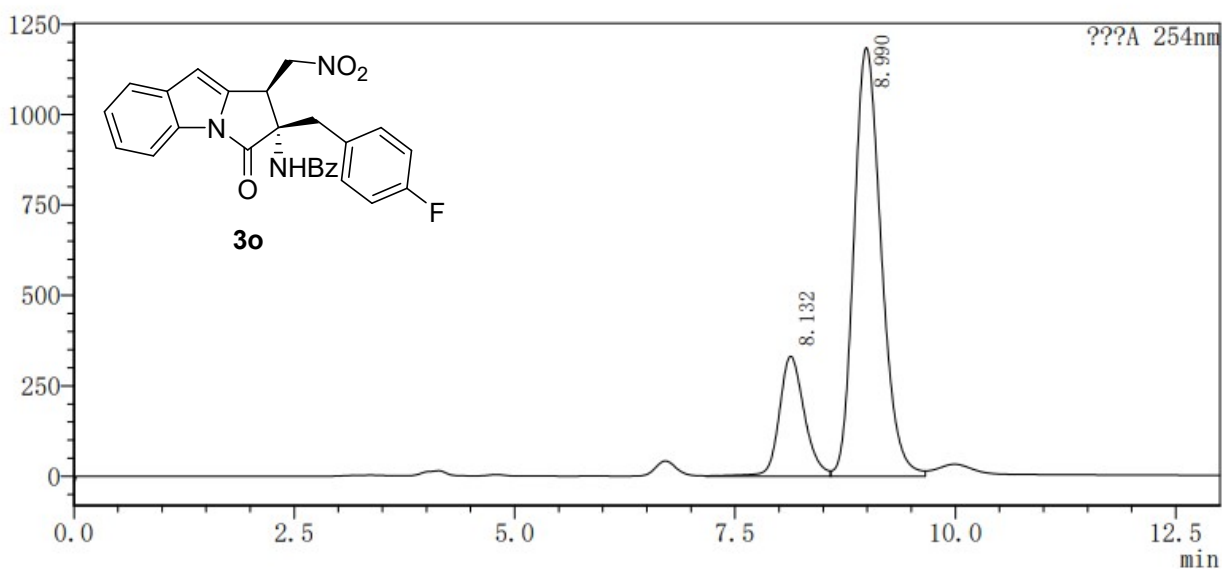

| Peak# | Ret. Time | Area     | Height  | Area%   | Height% |
|-------|-----------|----------|---------|---------|---------|
| 1     | 8.132     | 6593203  | 331851  | 20.498  | 21.875  |
| 2     | 8.990     | 25571534 | 1185162 | 79.502  | 78.125  |
| Total |           | 32164737 | 1517014 | 100.000 | 100.000 |

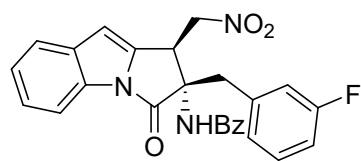

**3p**

$^1\text{H}$  NMR (400 MHz,  $\text{DMSO}-d_6$ )

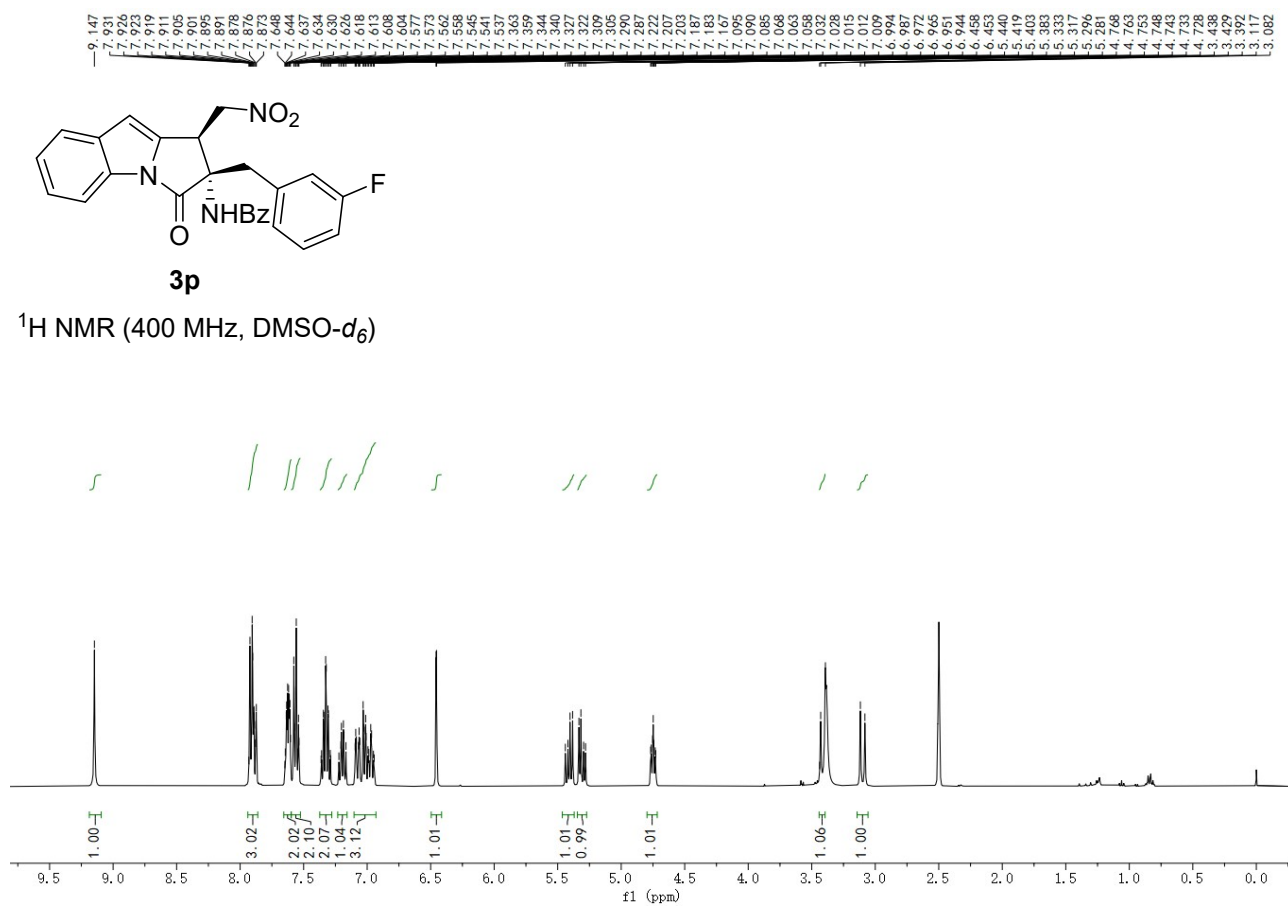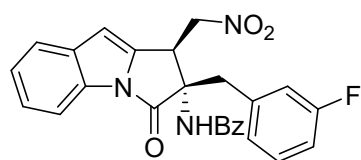

**3p**

$^{13}\text{C}$  NMR (100 MHz,  $\text{DMSO}-d_6$ )

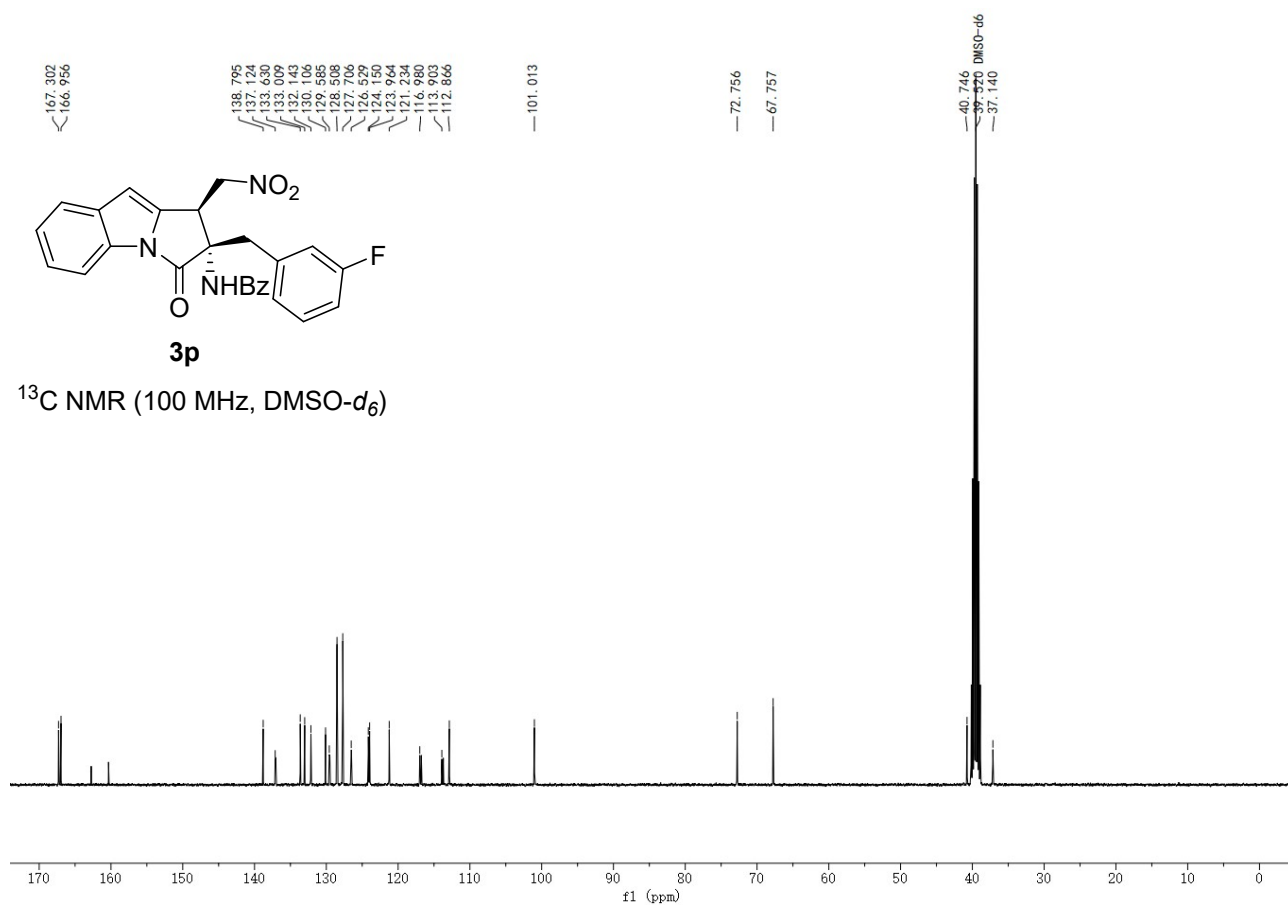

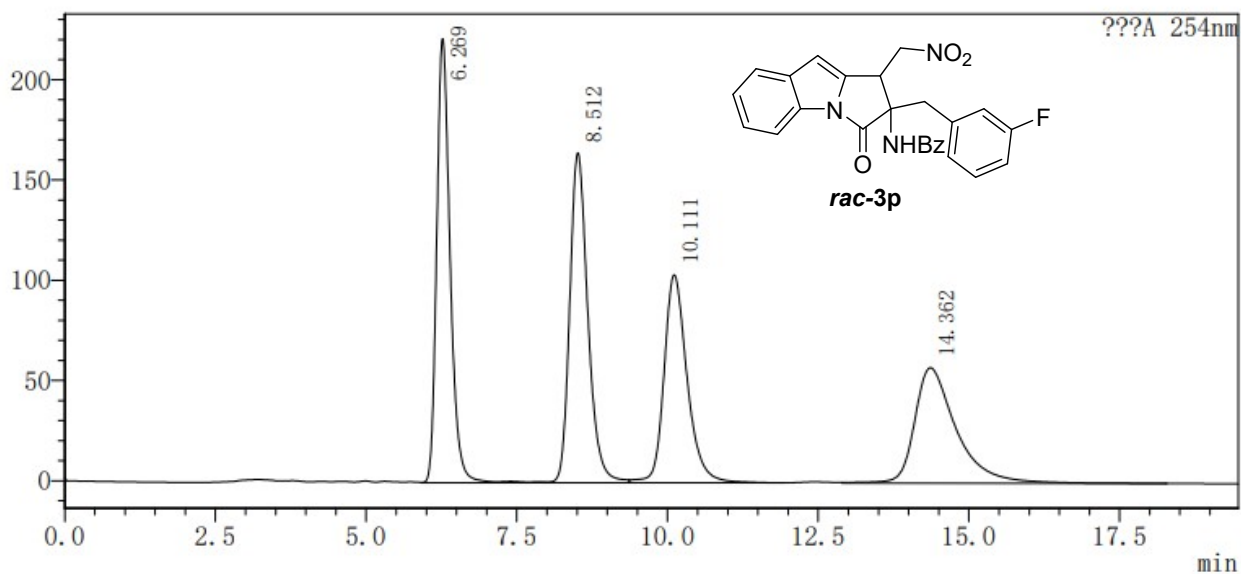

| Peak# | Ret. Time | Area     | Height | Area%   | Height% |
|-------|-----------|----------|--------|---------|---------|
| 1     | 6.269     | 3421760  | 221321 | 27.596  | 40.463  |
| 2     | 8.512     | 3439577  | 164480 | 27.740  | 30.071  |
| 3     | 10.111    | 2776075  | 103691 | 22.389  | 18.957  |
| 4     | 14.362    | 2761945  | 57485  | 22.275  | 10.510  |
| Total |           | 12399357 | 546976 | 100.000 | 100.000 |

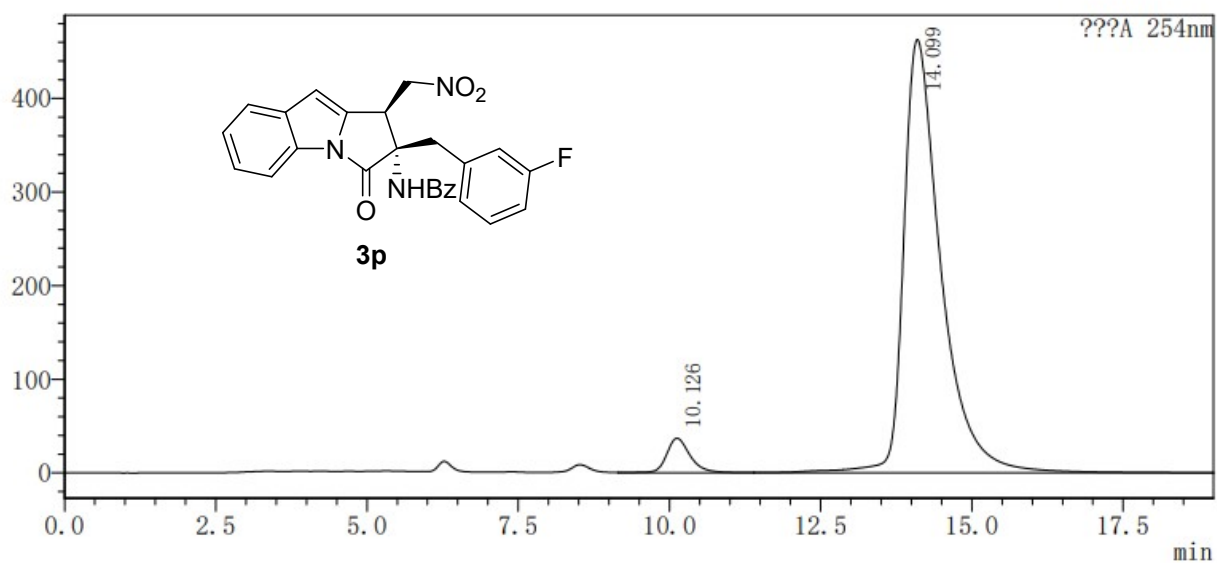

| Peak# | Ret. Time | Area     | Height | Area%   | Height% |
|-------|-----------|----------|--------|---------|---------|
| 1     | 10.126    | 1017347  | 36920  | 4.856   | 7.386   |
| 2     | 14.099    | 19931836 | 462948 | 95.144  | 92.614  |
| Total |           | 20949183 | 499868 | 100.000 | 100.000 |

9.098  
7.926  
7.920  
7.917  
7.912  
7.905  
7.900  
7.896  
7.889  
7.886  
7.873  
7.871  
7.867  
7.849  
7.641  
7.635  
7.633  
7.629  
7.623  
7.617  
7.608  
7.604  
7.601  
7.569  
7.565  
7.553  
7.550  
7.536  
7.536  
7.529  
7.529  
7.361  
7.358  
7.343  
7.339  
7.325  
7.320  
7.320  
7.303  
7.288  
7.285  
7.261  
7.252  
7.247  
7.238  
7.231  
7.222  
7.217  
7.209  
7.002  
6.994  
6.989  
6.978  
6.972  
6.968  
6.955  
6.950  
6.448  
6.443  
5.436  
5.415  
5.399  
5.397  
5.377  
5.373  
5.318  
5.296  
5.281  
4.755  
4.750  
4.740  
4.735  
4.730  
4.720  
4.715  
3.400  
3.364  
3.078  
3.043

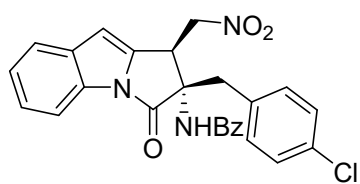

$^1\text{H}$  NMR (400 MHz,  $\text{DMSO}-d_6$ )

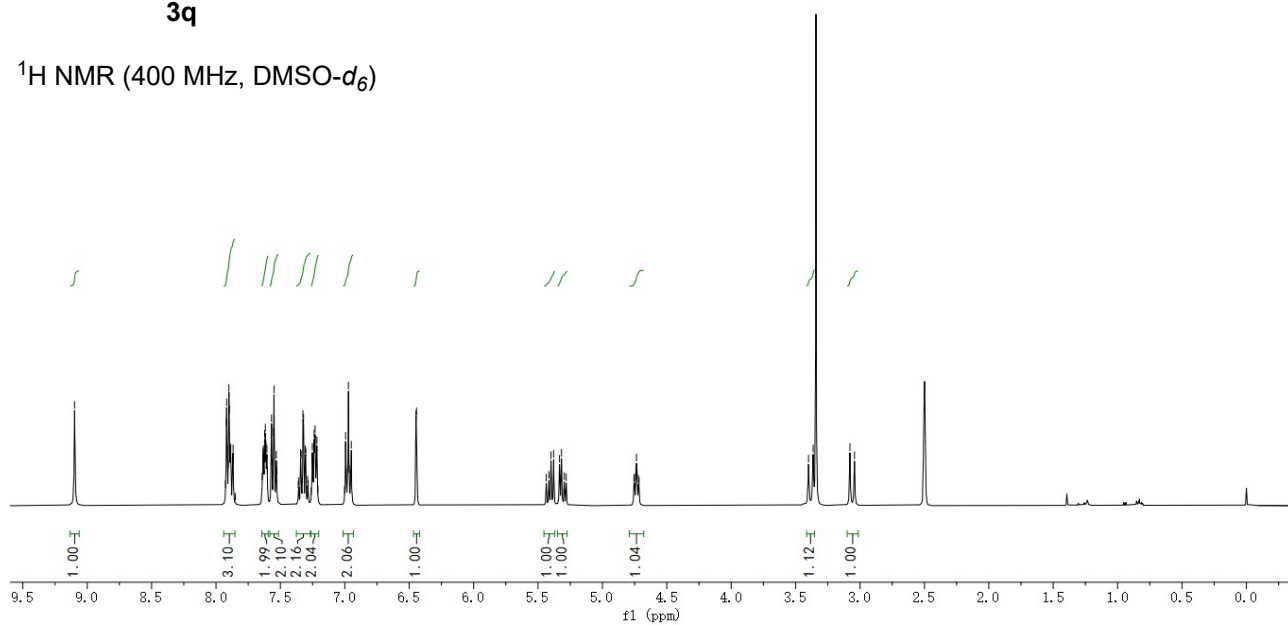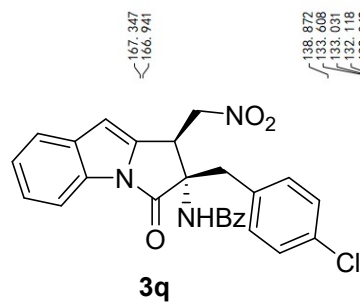

$^{13}\text{C}$  NMR (100 MHz,  $\text{DMSO}-d_6$ )

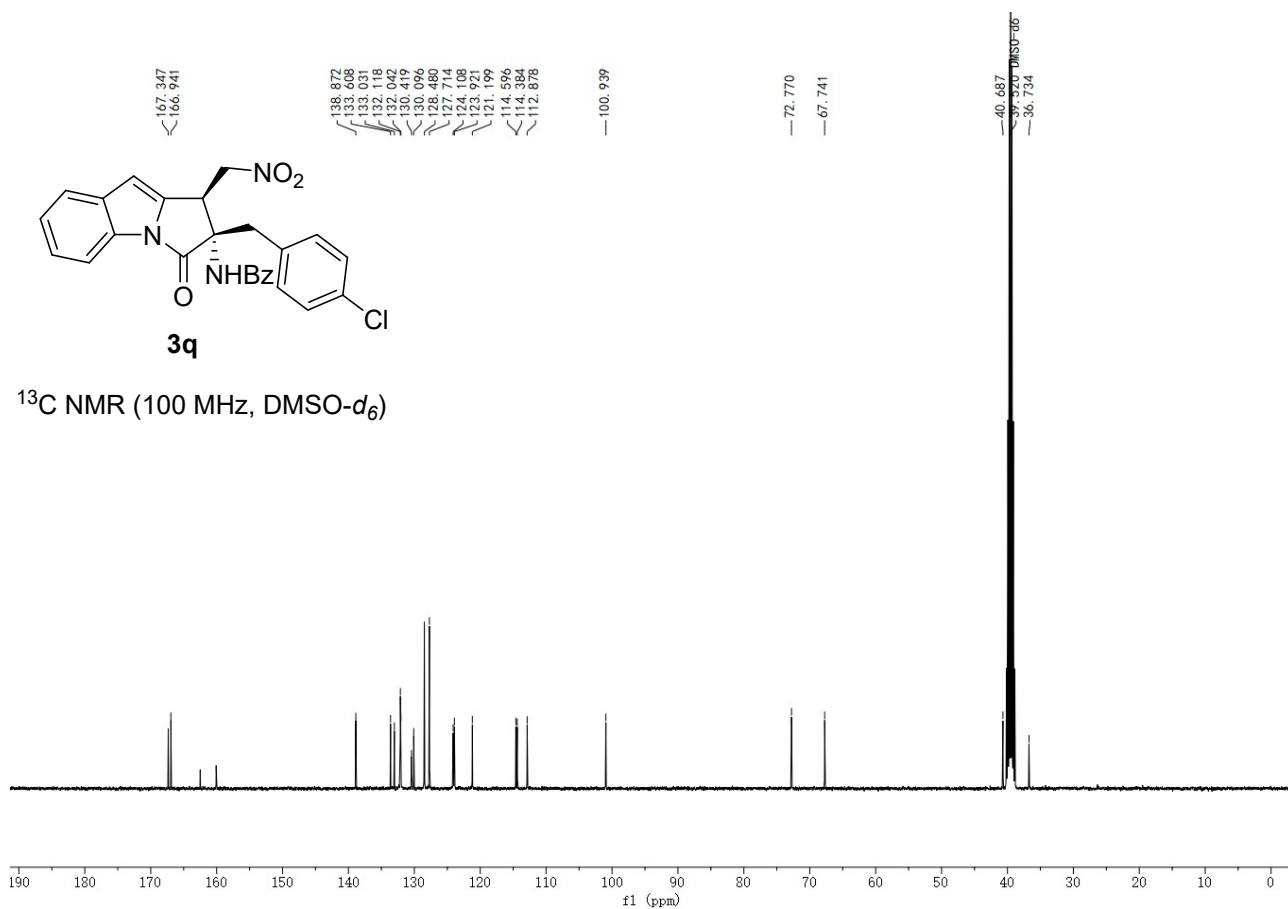

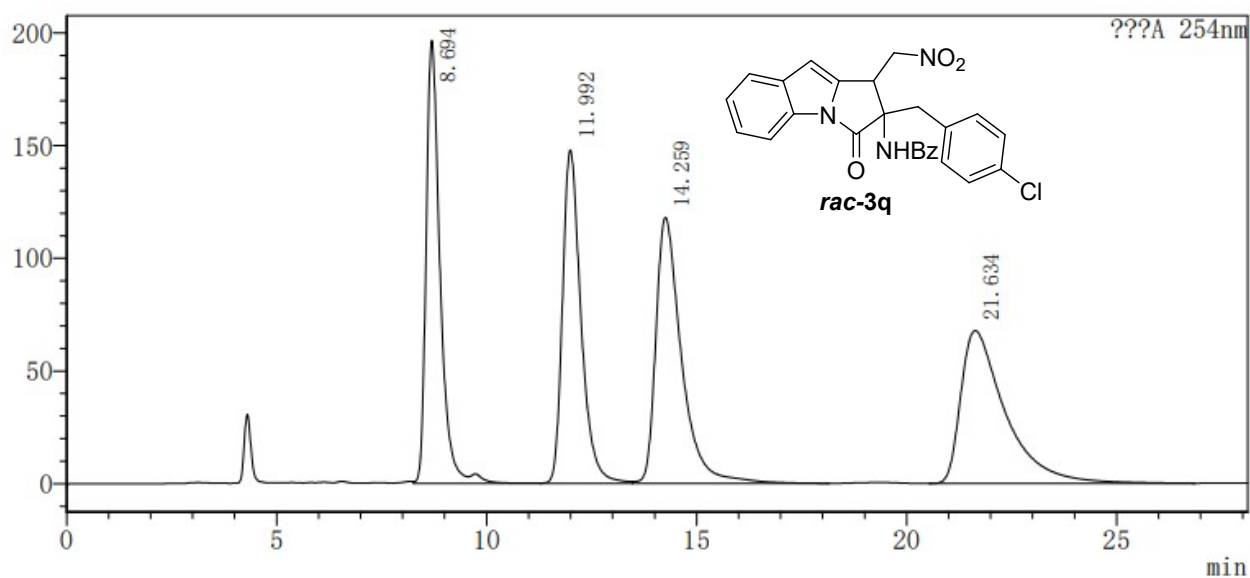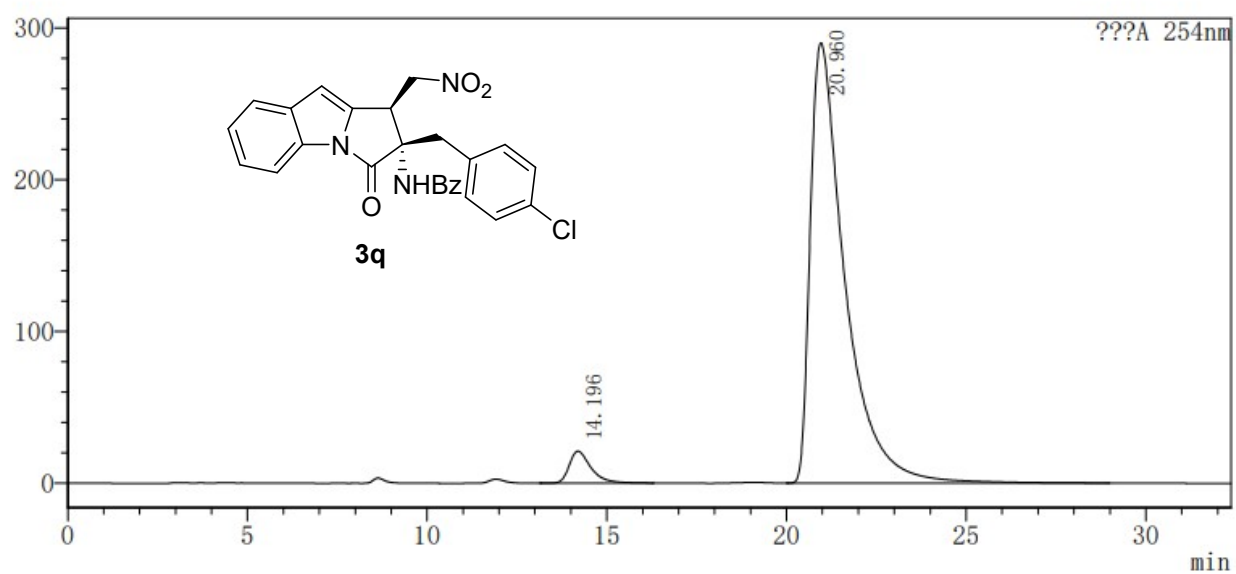

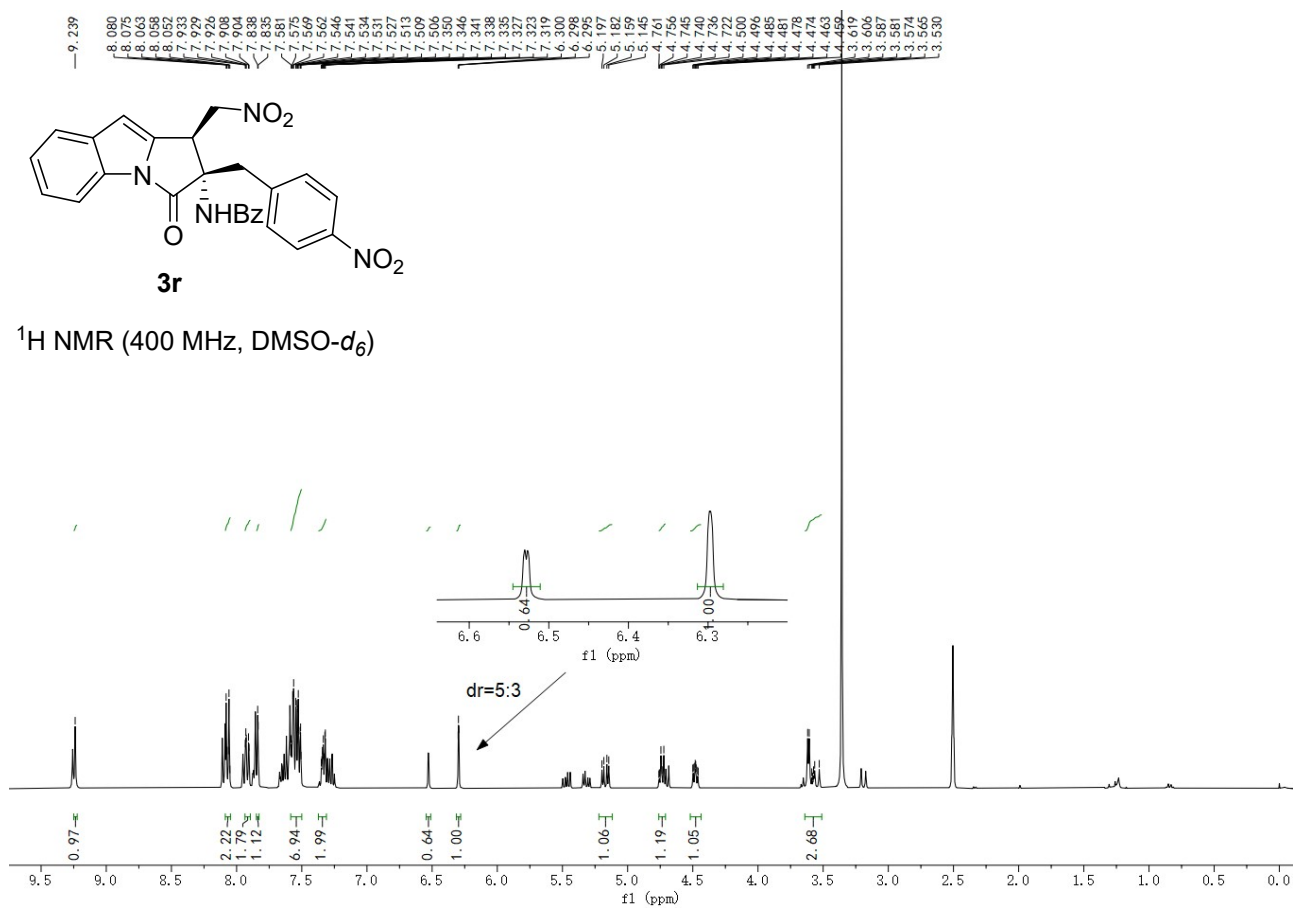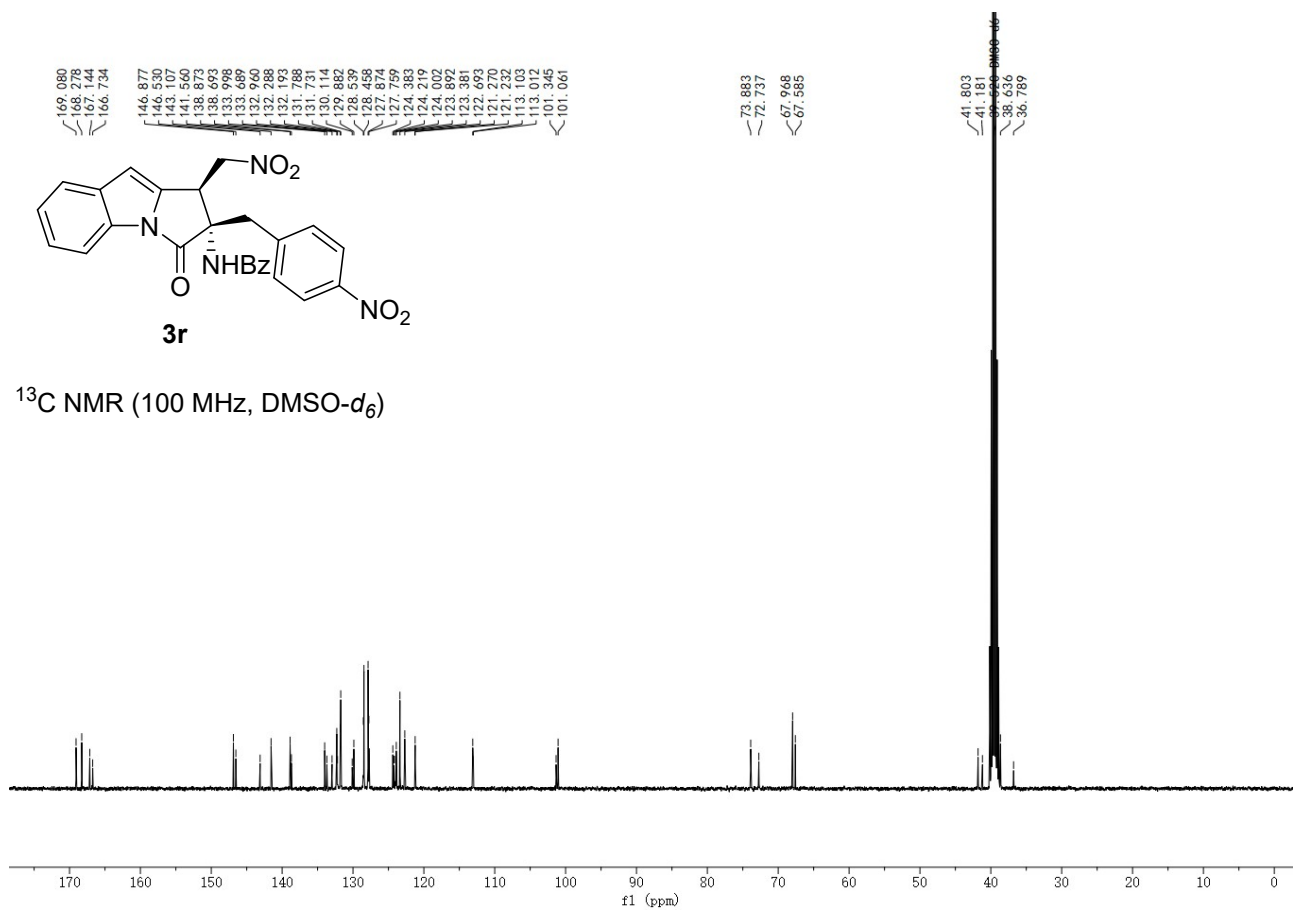

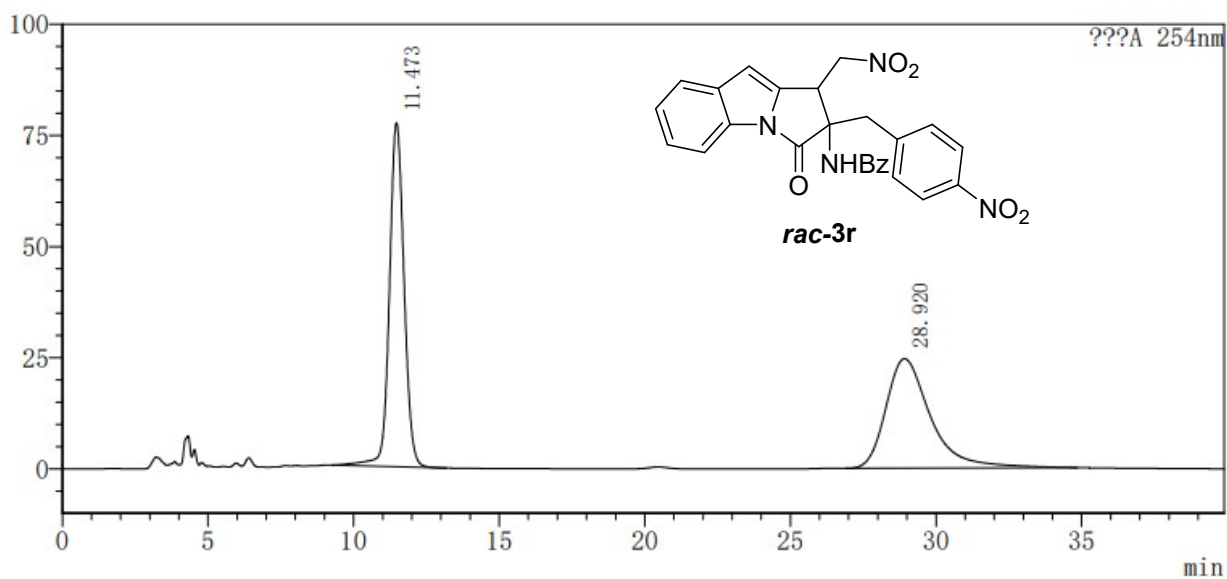

| Peak# | Ret. Time | Area    | Height | Area%   | Height% |
|-------|-----------|---------|--------|---------|---------|
| 1     | 11.473    | 2707098 | 77418  | 50.794  | 75.854  |
| 2     | 28.920    | 2622509 | 24643  | 49.206  | 24.146  |
| Total |           | 5329607 | 102061 | 100.000 | 100.000 |

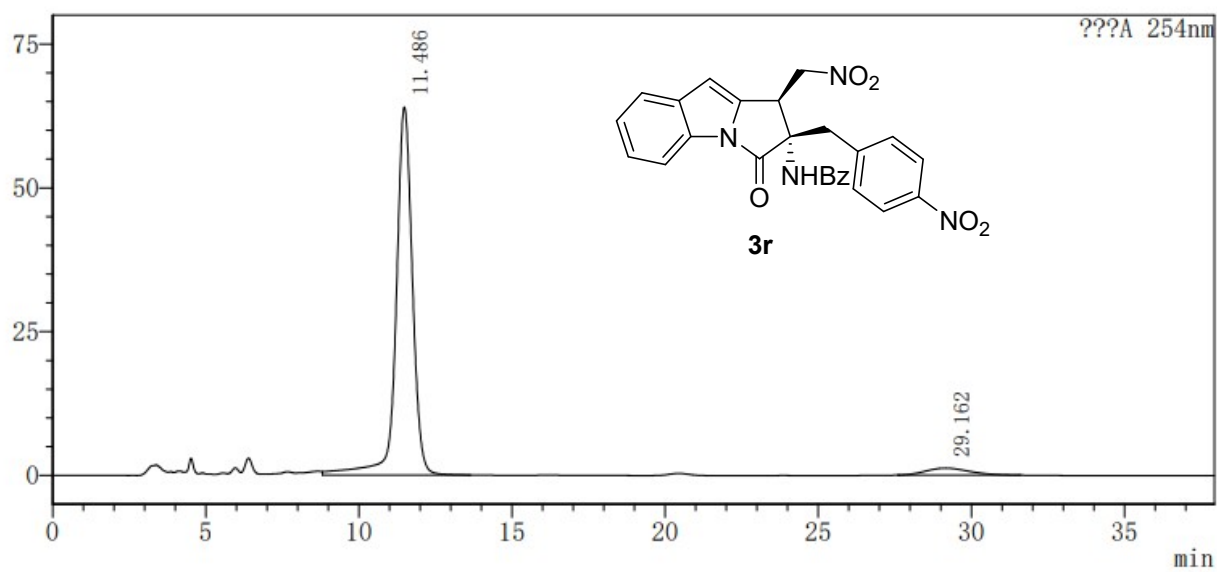

| Peak# | Ret. Time | Area    | Height | Area%   | Height% |
|-------|-----------|---------|--------|---------|---------|
| 1     | 11.486    | 2387259 | 64003  | 95.166  | 98.130  |
| 2     | 29.162    | 121257  | 1219   | 4.834   | 1.870   |
| Total |           | 2508515 | 65222  | 100.000 | 100.000 |

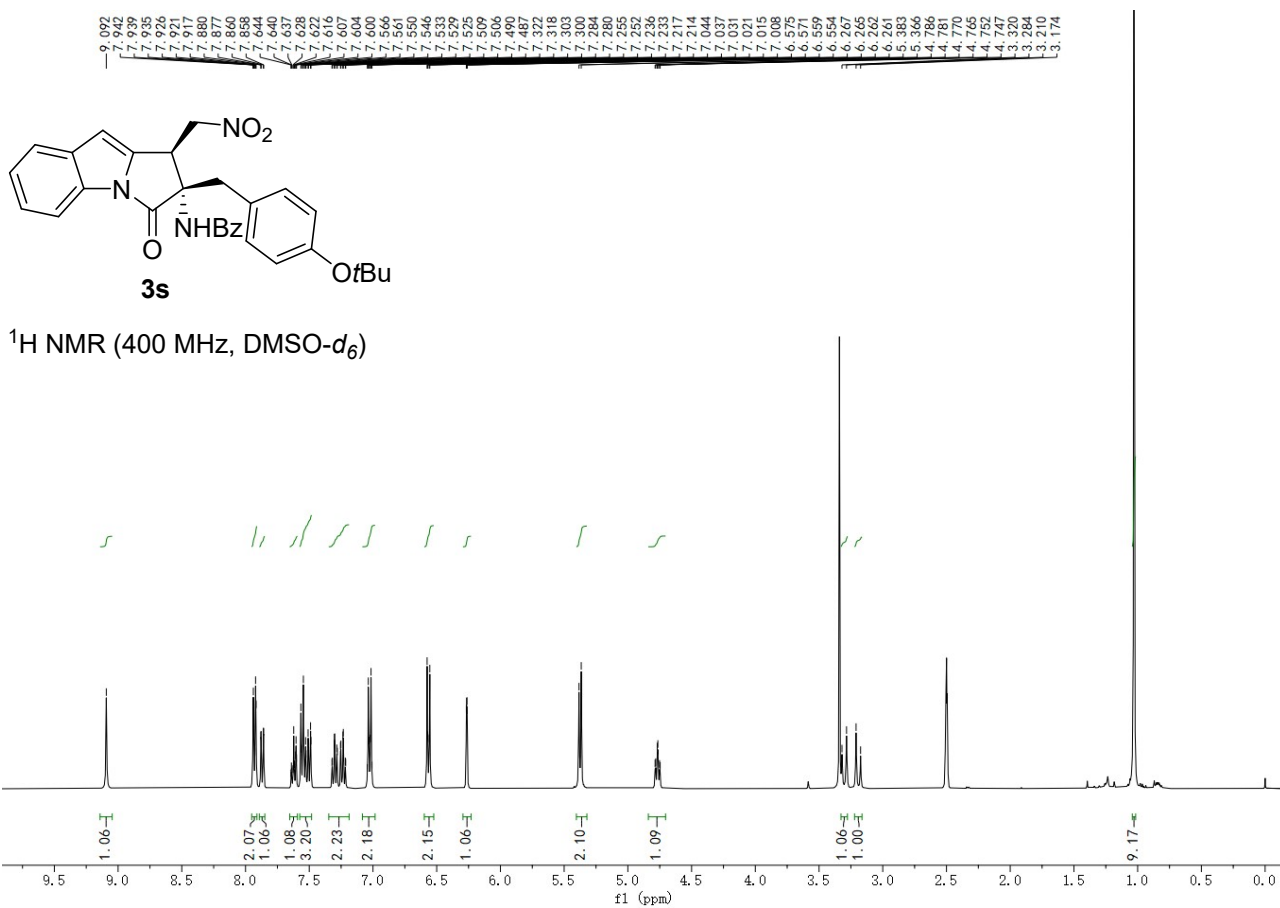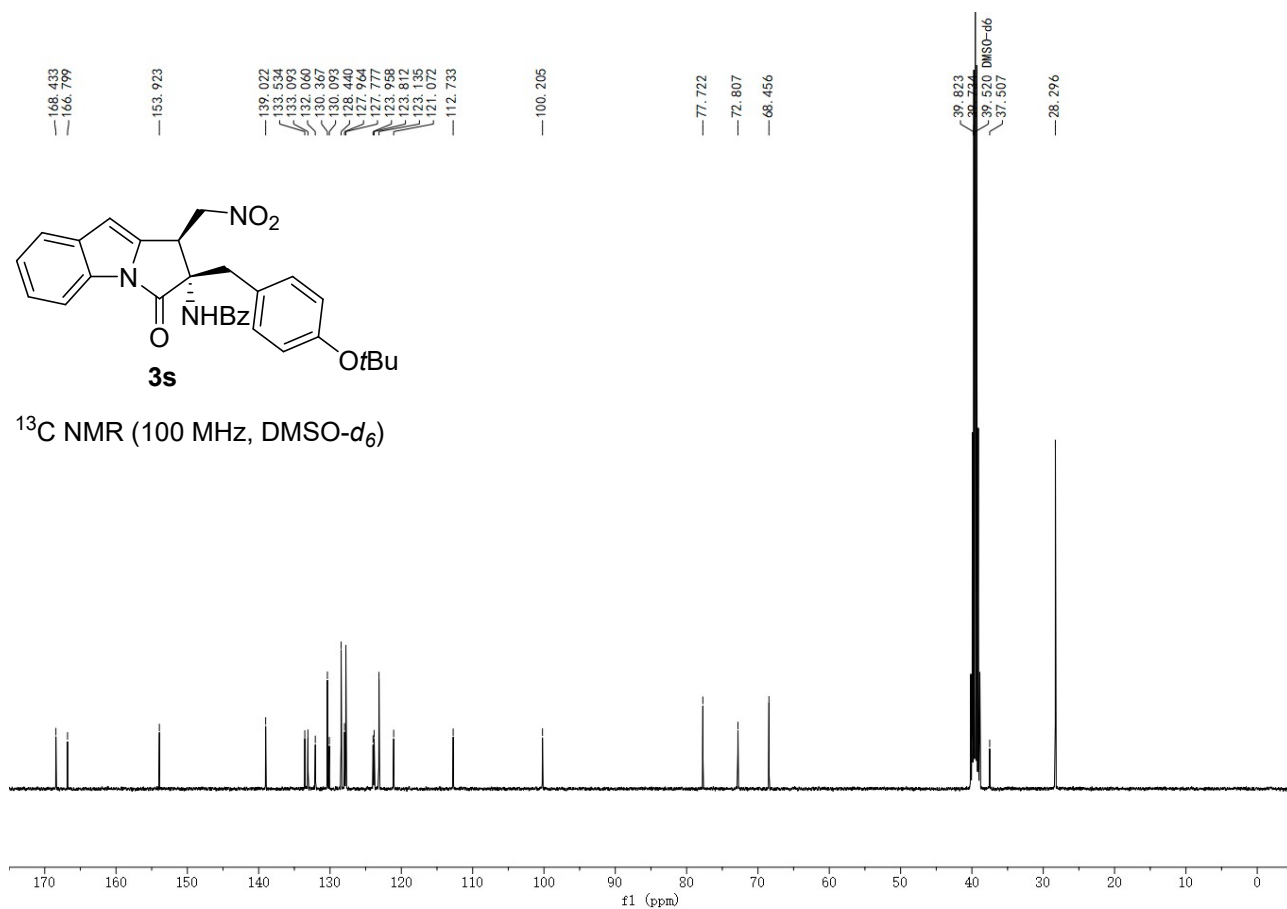

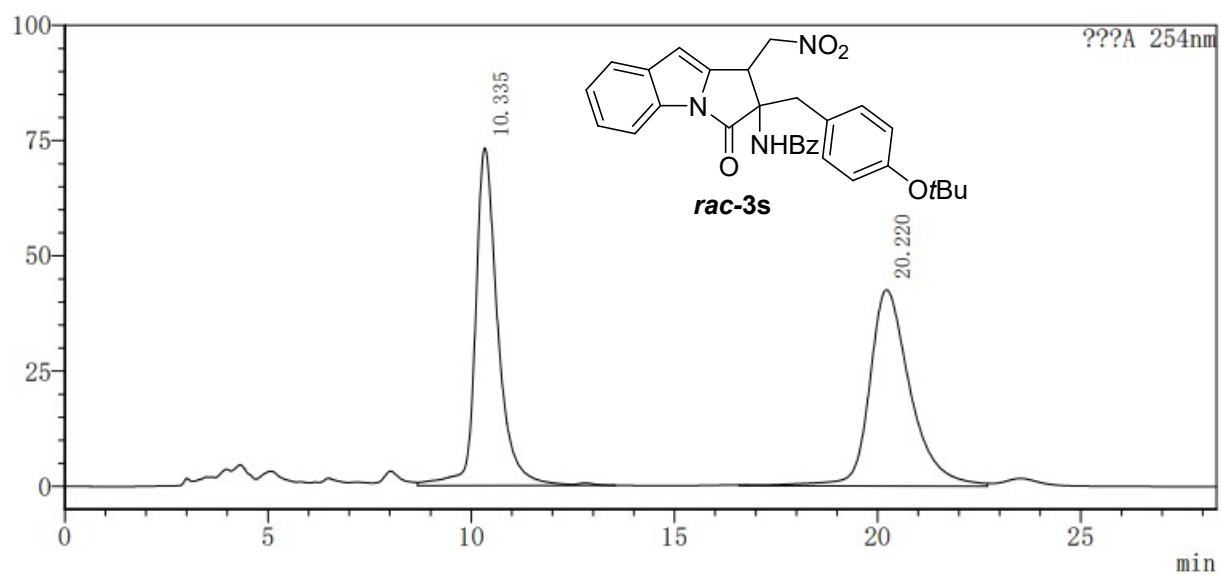

| Peak# | Ret. Time | Area    | Height | Area%   | Height% |
|-------|-----------|---------|--------|---------|---------|
| 1     | 10.335    | 2818033 | 73243  | 48.572  | 63.238  |
| 2     | 20.220    | 2983762 | 42578  | 51.428  | 36.762  |
| Total |           | 5801795 | 115821 | 100.000 | 100.000 |

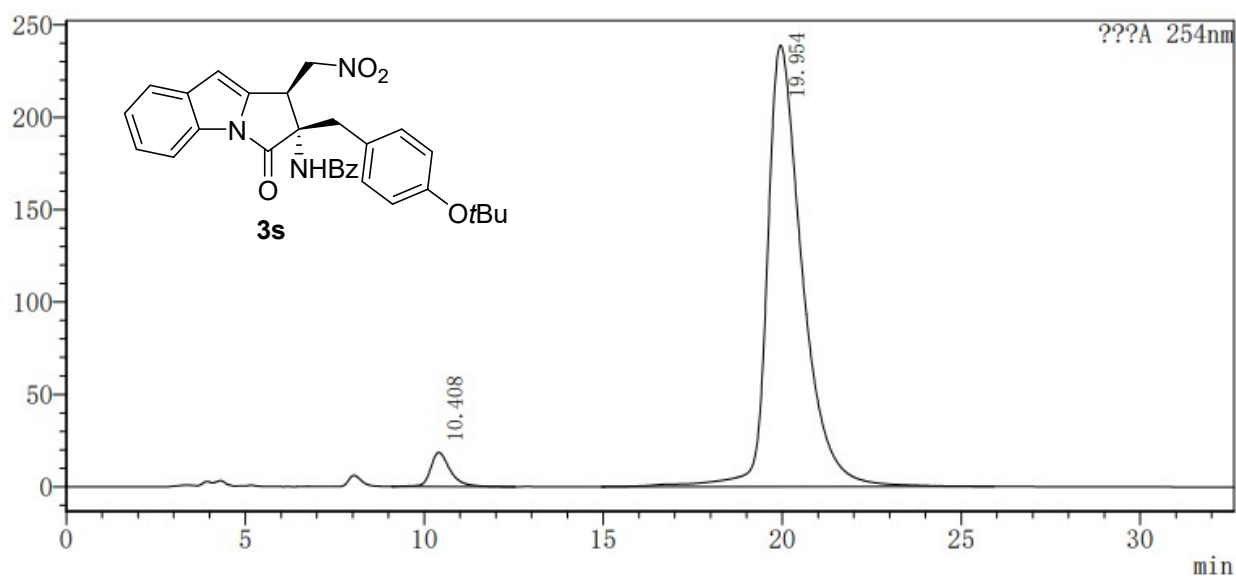

| Peak# | Ret. Time | Area     | Height | Area%   | Height% |
|-------|-----------|----------|--------|---------|---------|
| 1     | 10.408    | 704026   | 18494  | 4.148   | 7.187   |
| 2     | 19.954    | 16268316 | 238844 | 95.852  | 92.813  |
| Total |           | 16972342 | 257338 | 100.000 | 100.000 |

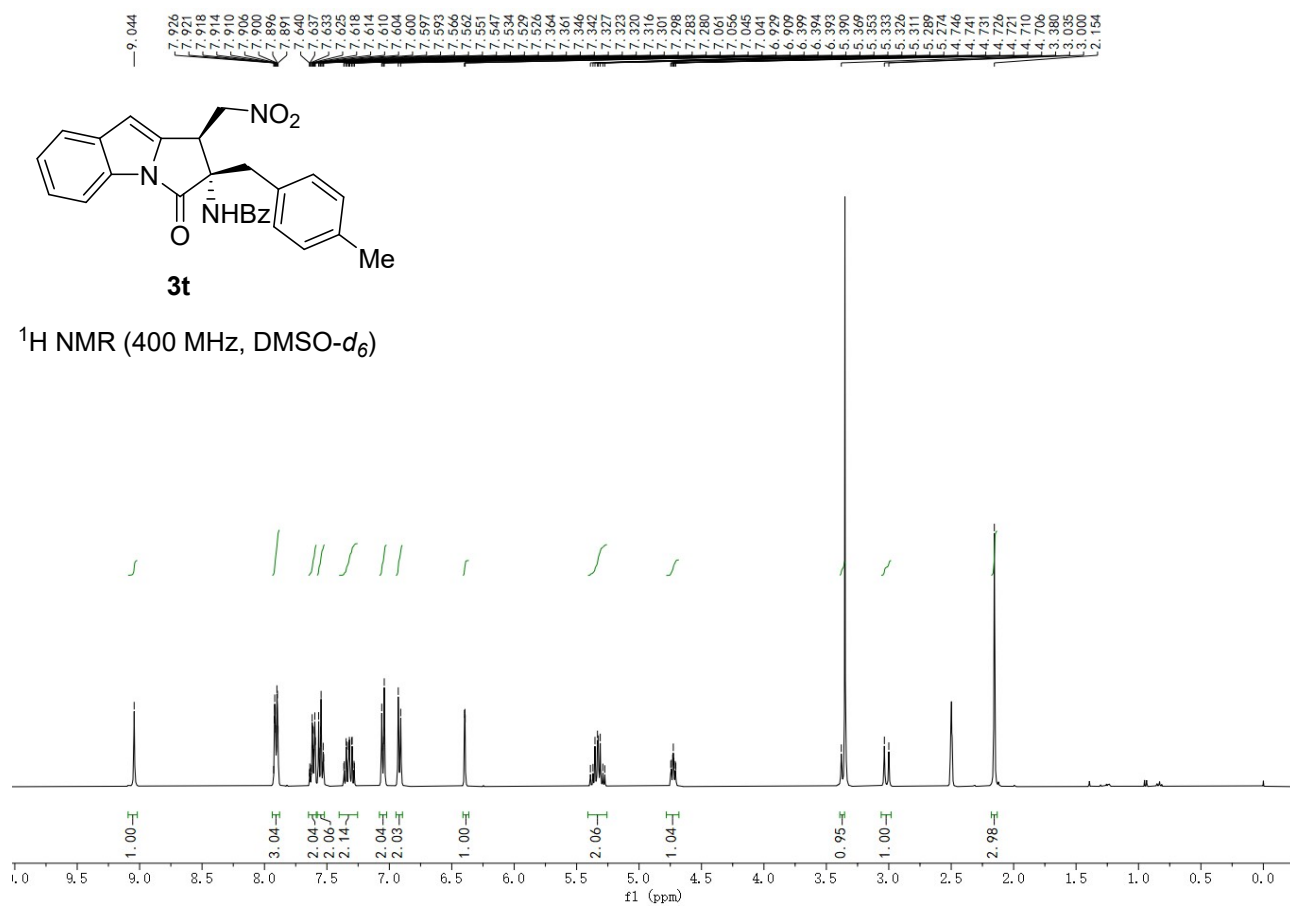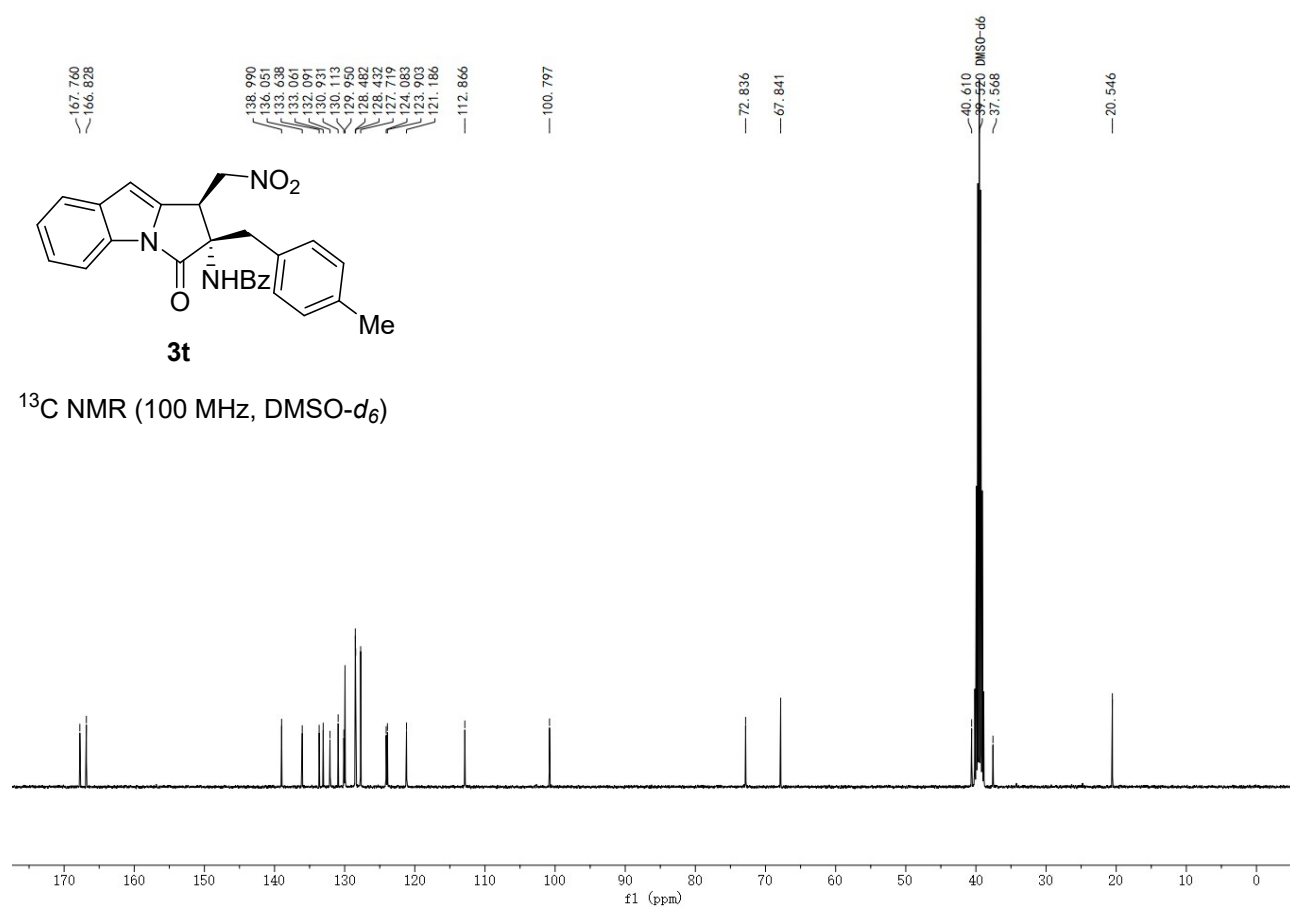

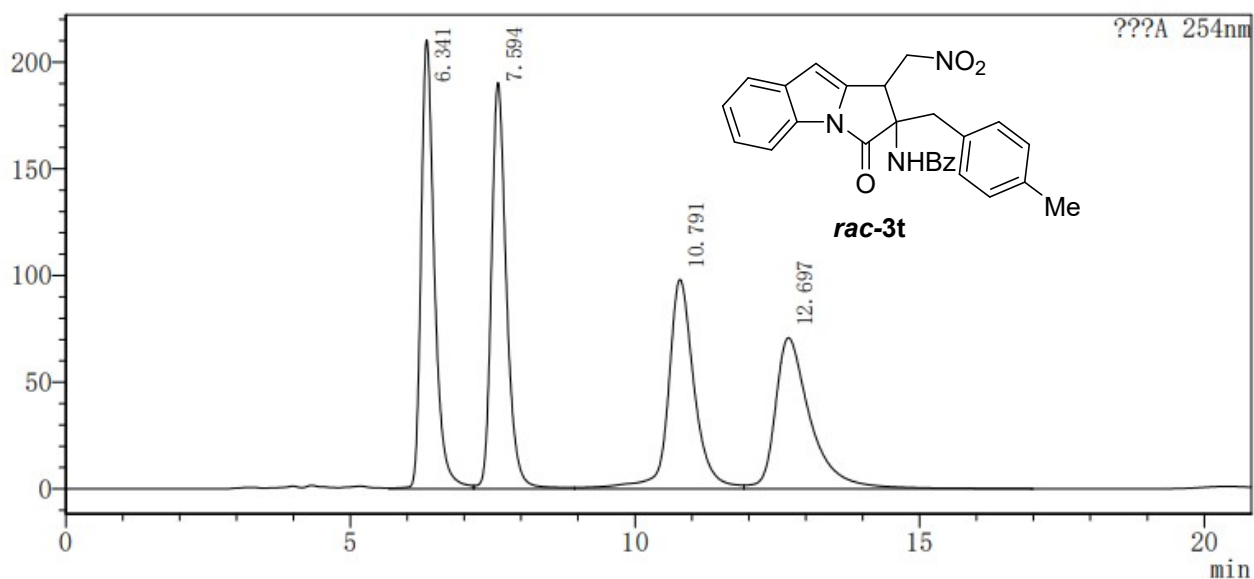

| Peak# | Ret. Time | Area     | Height | Area%   | Height% |
|-------|-----------|----------|--------|---------|---------|
| 1     | 6.341     | 3434587  | 210420 | 26.283  | 36.943  |
| 2     | 7.594     | 3492961  | 190328 | 26.730  | 33.416  |
| 3     | 10.791    | 3103730  | 98116  | 23.751  | 17.226  |
| 4     | 12.697    | 3036347  | 70715  | 23.236  | 12.415  |
| Total |           | 13067624 | 569580 | 100.000 | 100.000 |

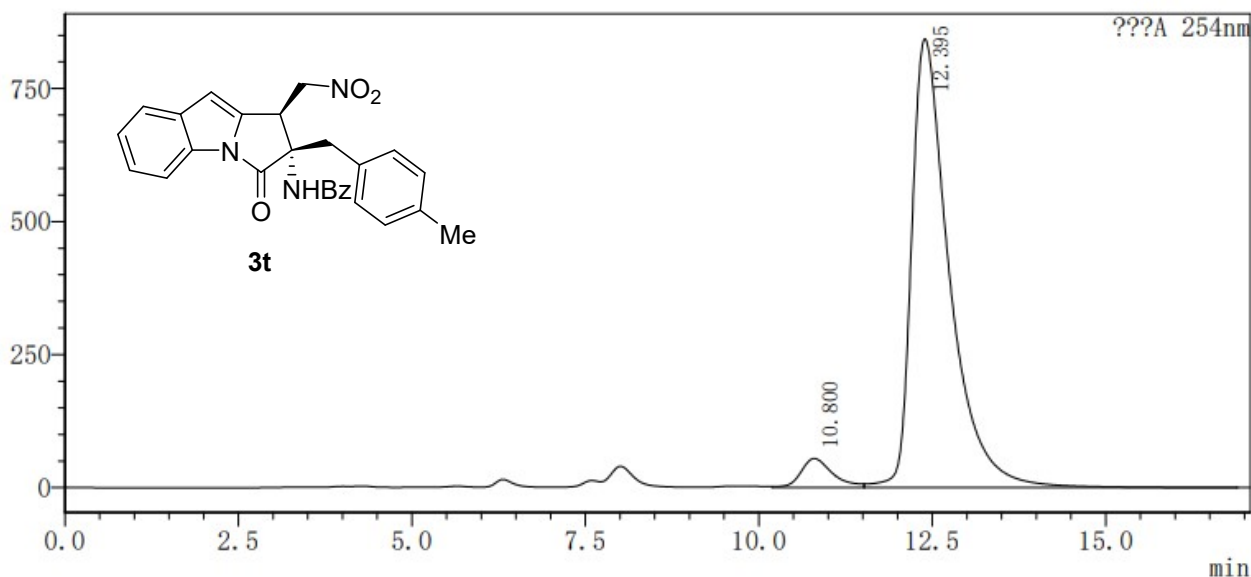

| Peak# | Ret. Time | Area     | Height | Area%   | Height% |
|-------|-----------|----------|--------|---------|---------|
| 1     | 10.800    | 1754433  | 54781  | 5.180   | 6.100   |
| 2     | 12.395    | 32112540 | 843260 | 94.820  | 93.900  |
| Total |           | 33866973 | 898042 | 100.000 | 100.000 |

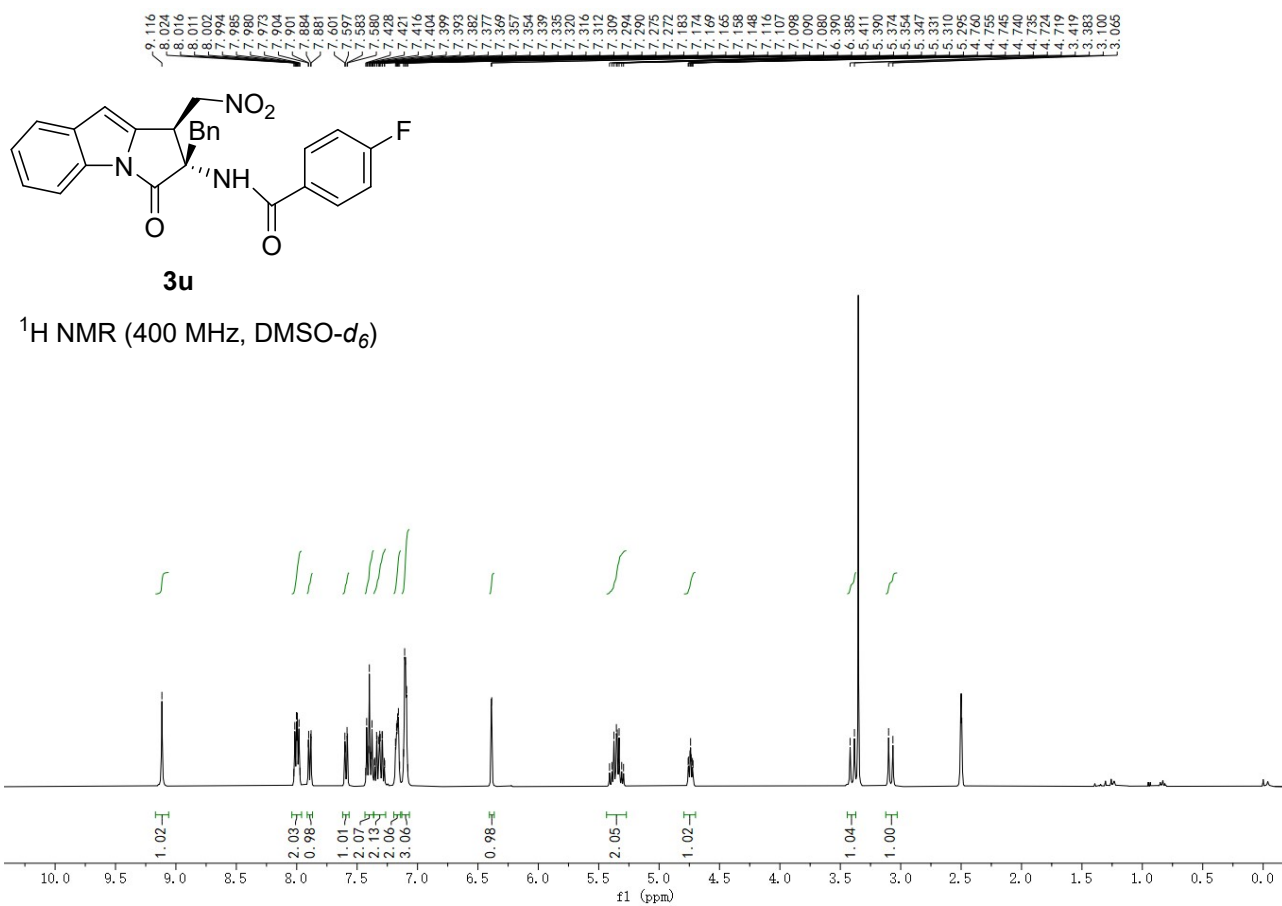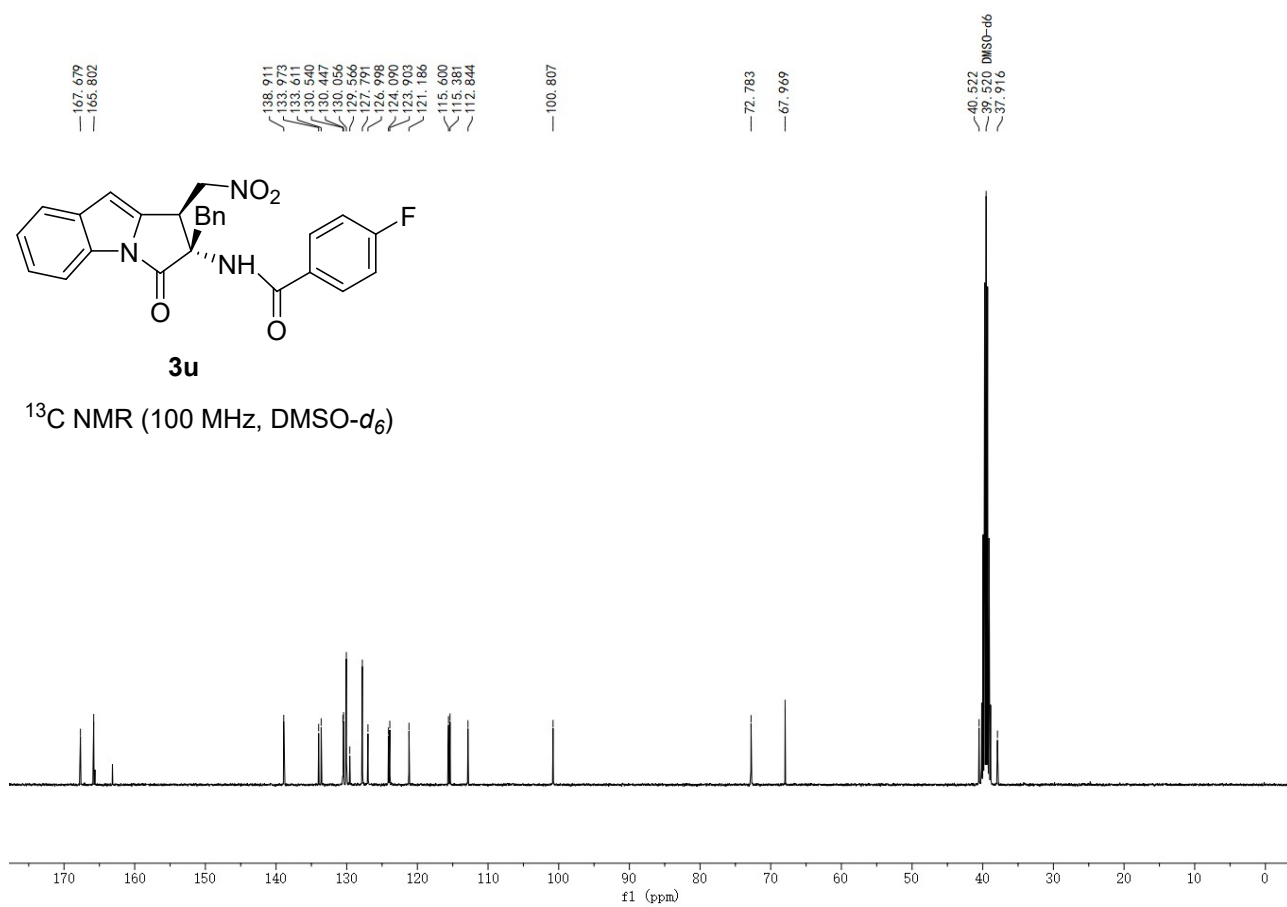

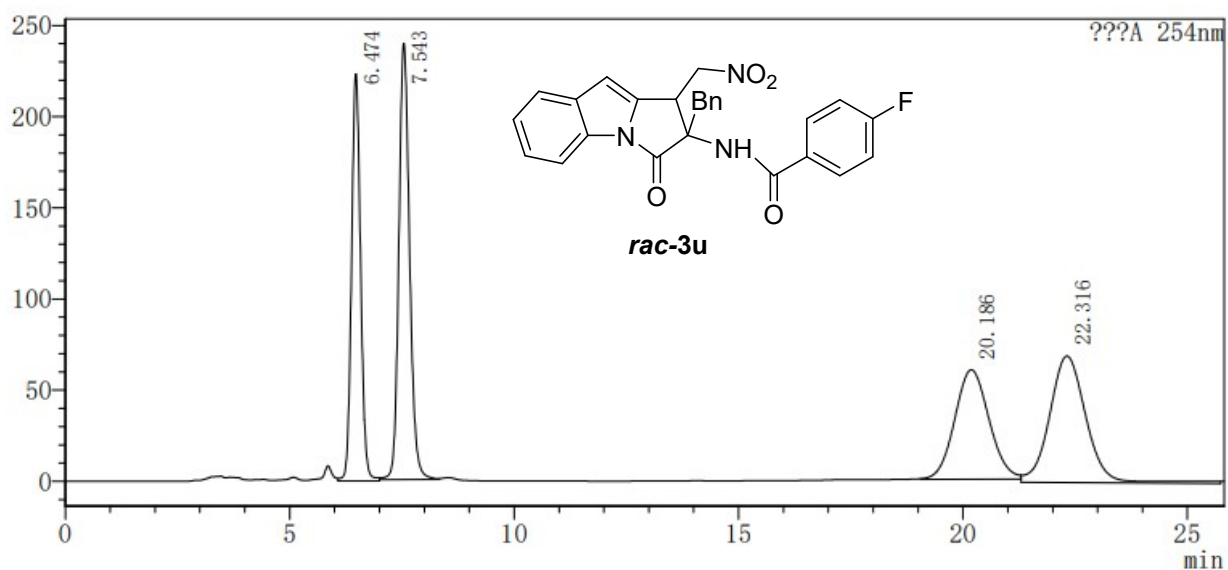

| Peak# | Ret. Time | Area     | Height | Area%   | Height% |
|-------|-----------|----------|--------|---------|---------|
| 1     | 6.474     | 3142260  | 223408 | 22.067  | 37.743  |
| 2     | 7.543     | 3969932  | 239165 | 27.879  | 40.405  |
| 3     | 20.186    | 3177470  | 59964  | 22.314  | 10.130  |
| 4     | 22.316    | 3950185  | 69384  | 27.740  | 11.722  |
| Total |           | 14239847 | 591920 | 100.000 | 100.000 |

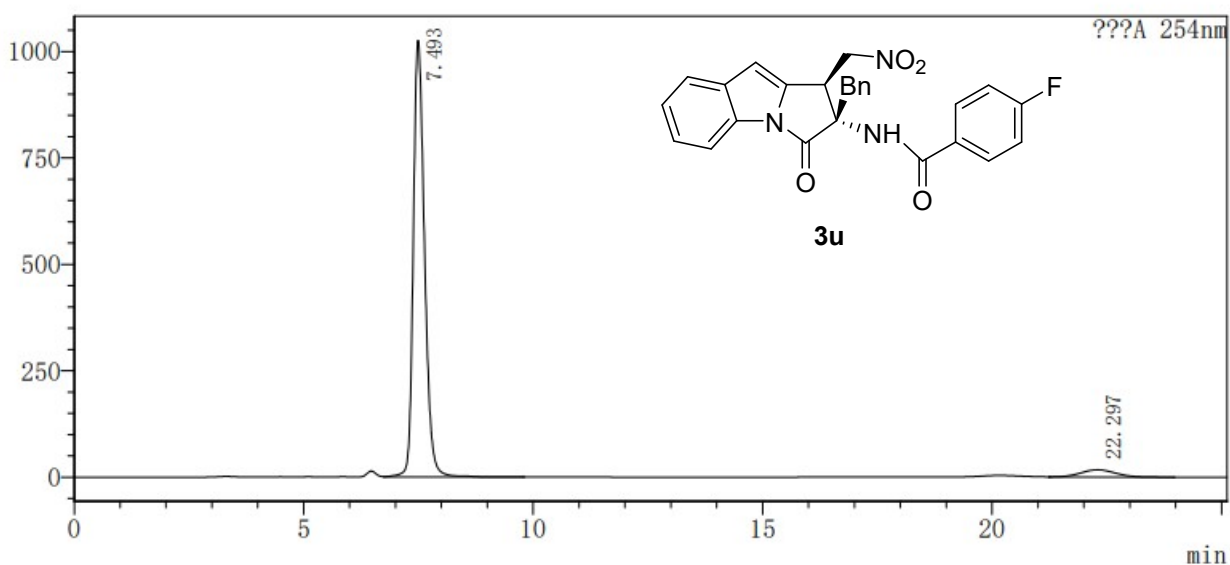

| Peak# | Ret. Time | Area     | Height  | Area%   | Height% |
|-------|-----------|----------|---------|---------|---------|
| 1     | 7.493     | 17514245 | 1025937 | 94.951  | 98.340  |
| 2     | 22.297    | 931253   | 17316   | 5.049   | 1.660   |
| Total |           | 18445498 | 1043253 | 100.000 | 100.000 |

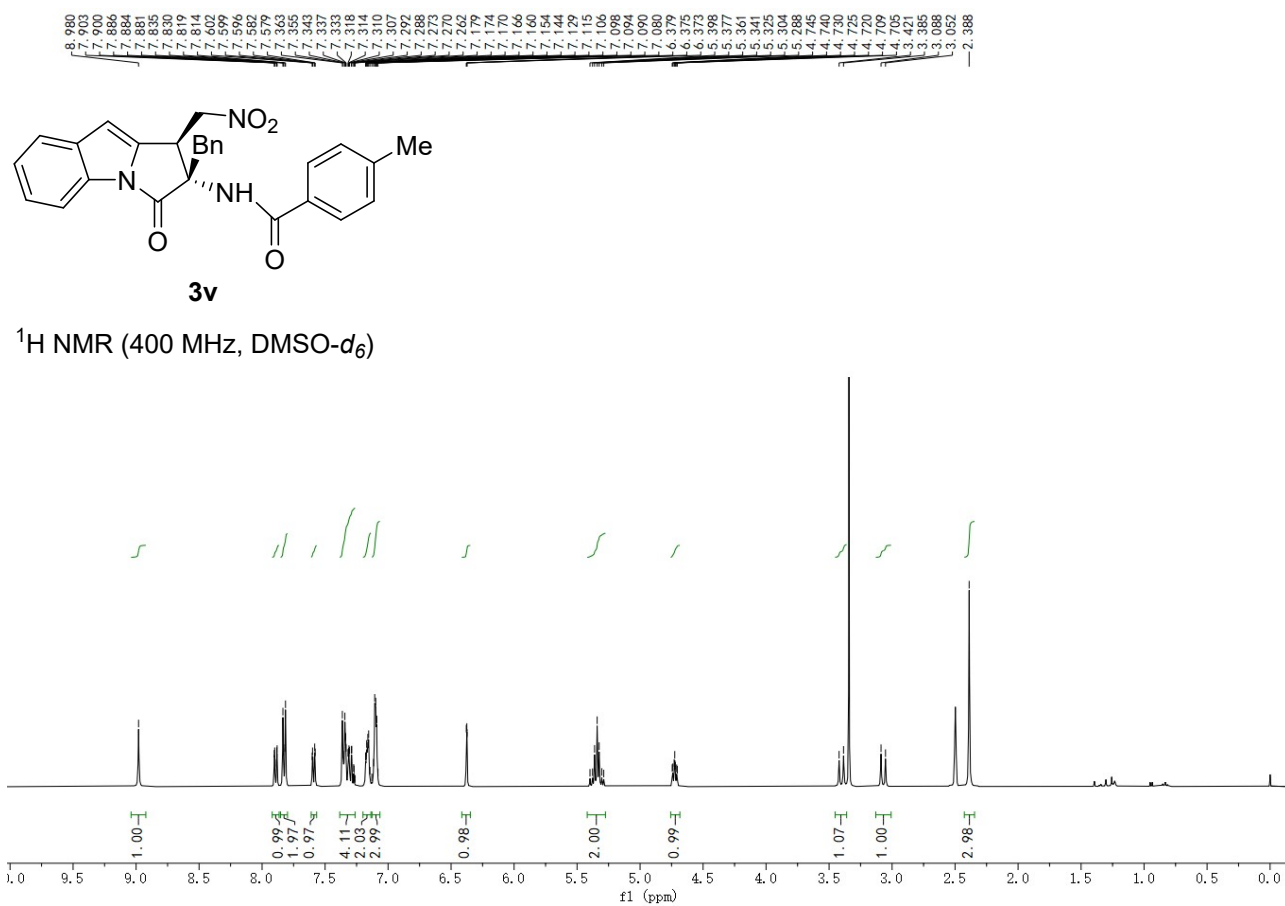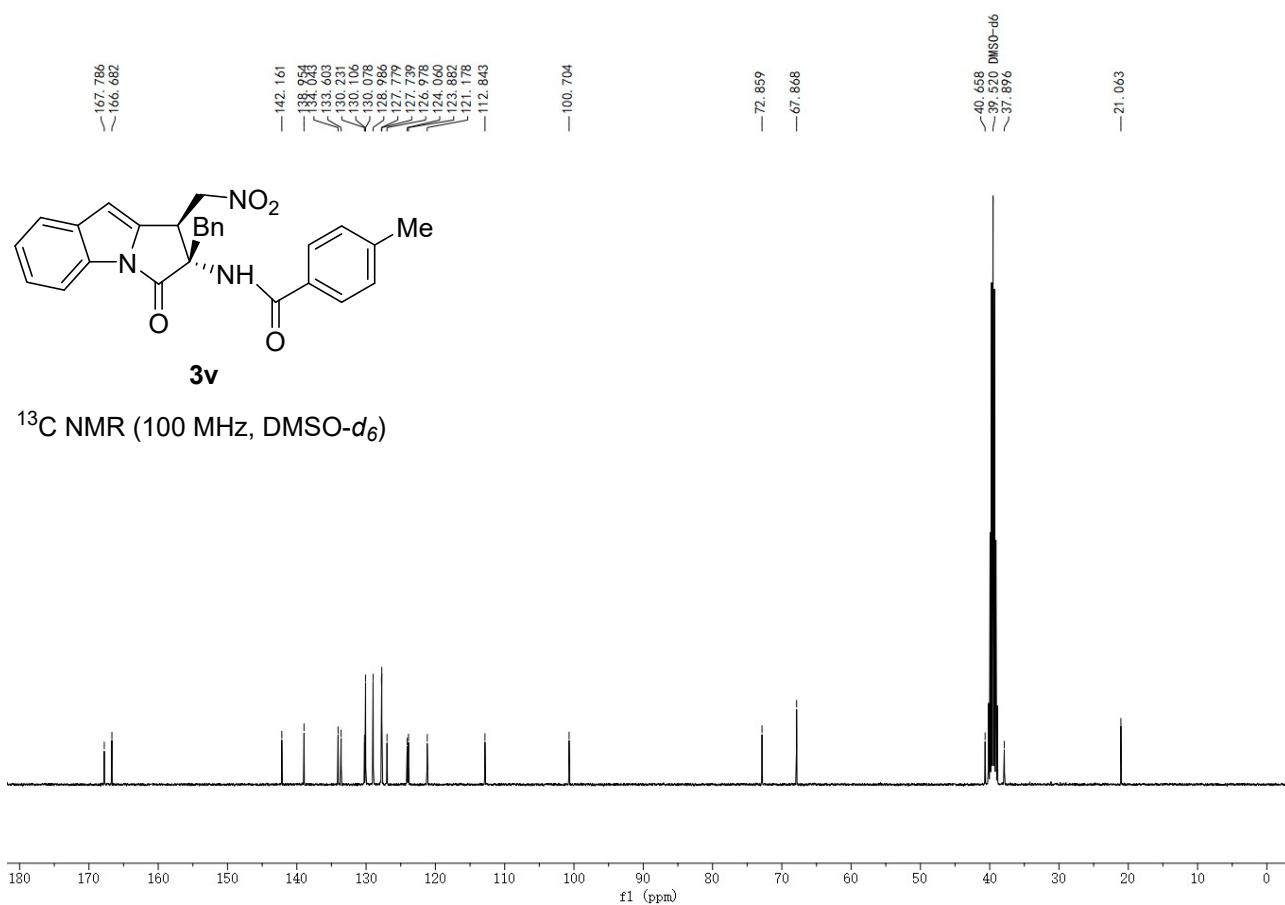

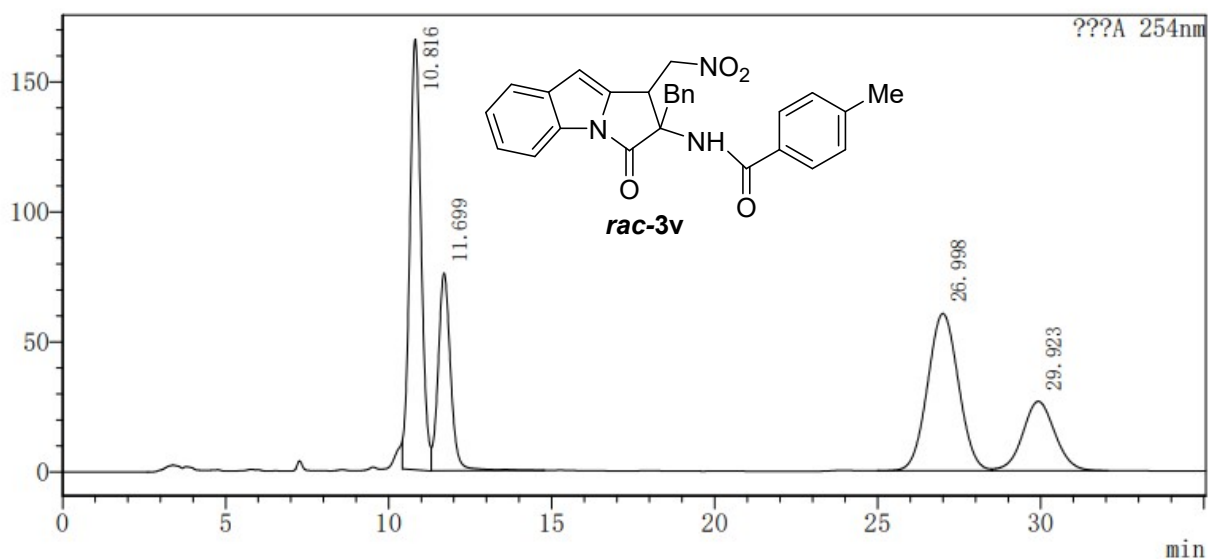

| Peak# | Ret. Time | Area     | Height | Area%   | Height% |
|-------|-----------|----------|--------|---------|---------|
| 1     | 10.816    | 4003573  | 165578 | 33.848  | 50.382  |
| 2     | 11.699    | 2006533  | 75956  | 16.964  | 23.112  |
| 3     | 26.998    | 3984560  | 60455  | 33.688  | 18.395  |
| 4     | 29.923    | 1833260  | 26655  | 15.499  | 8.111   |
| Total |           | 11827925 | 328644 | 100.000 | 100.000 |

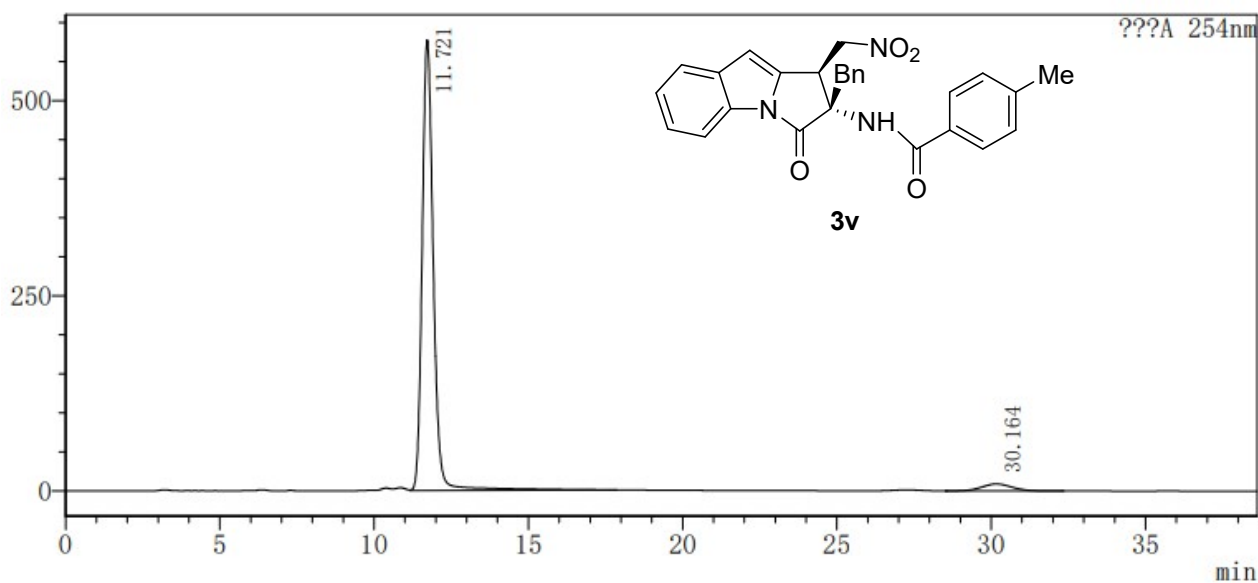

| Peak# | Ret. Time | Area     | Height | Area%   | Height% |
|-------|-----------|----------|--------|---------|---------|
| 1     | 11.721    | 14661565 | 577531 | 95.962  | 98.474  |
| 2     | 30.164    | 616935   | 8952   | 4.038   | 1.526   |
| Total |           | 15278500 | 586483 | 100.000 | 100.000 |

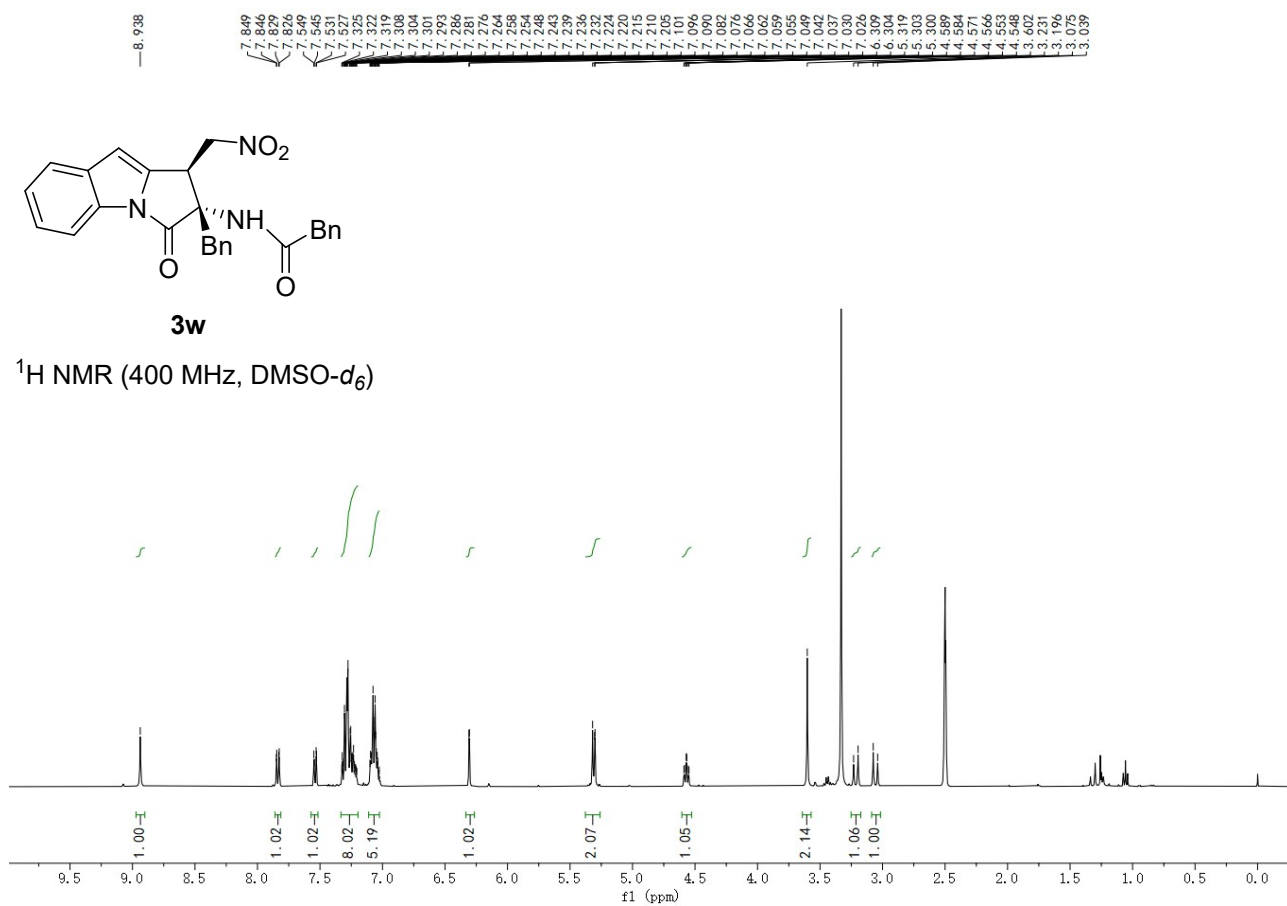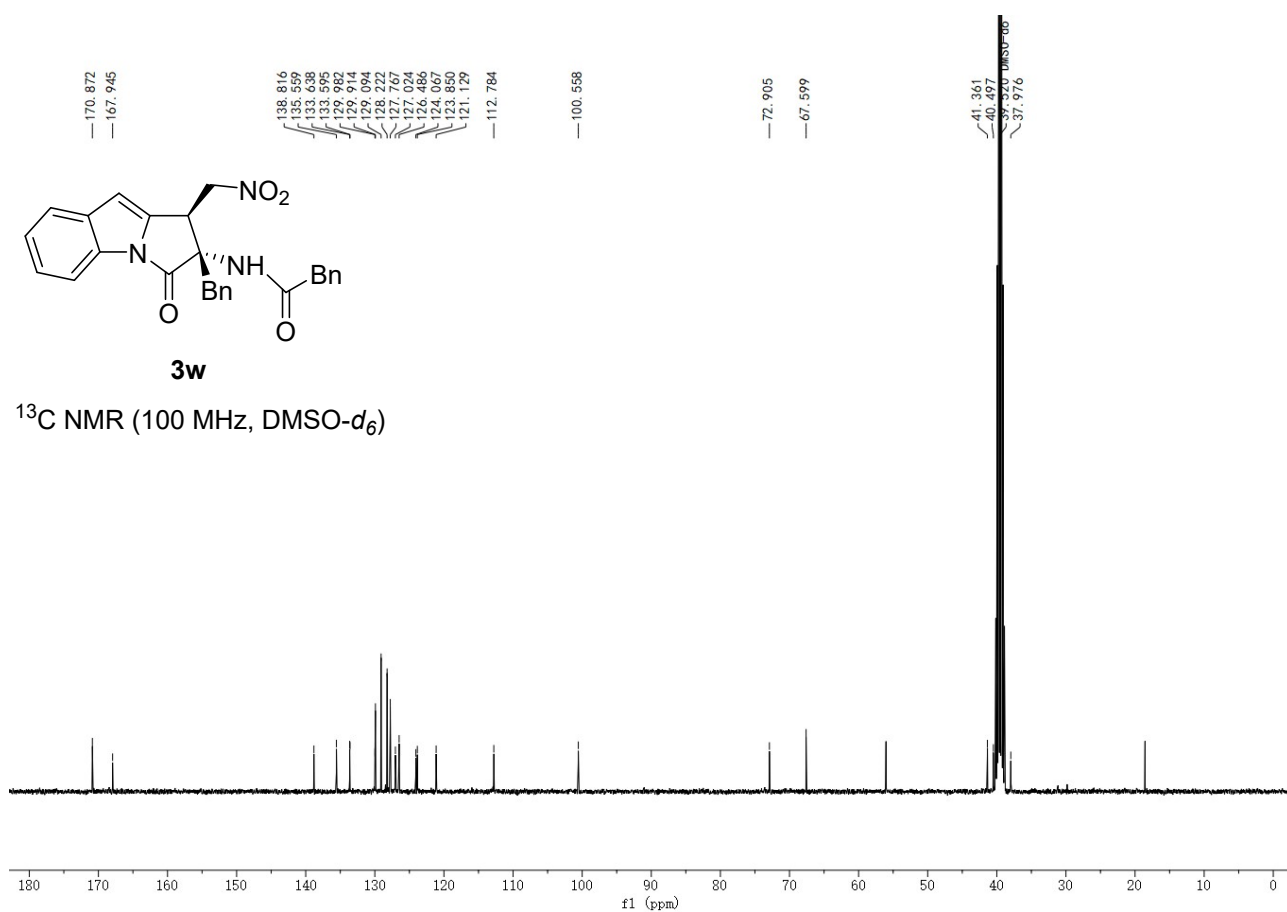

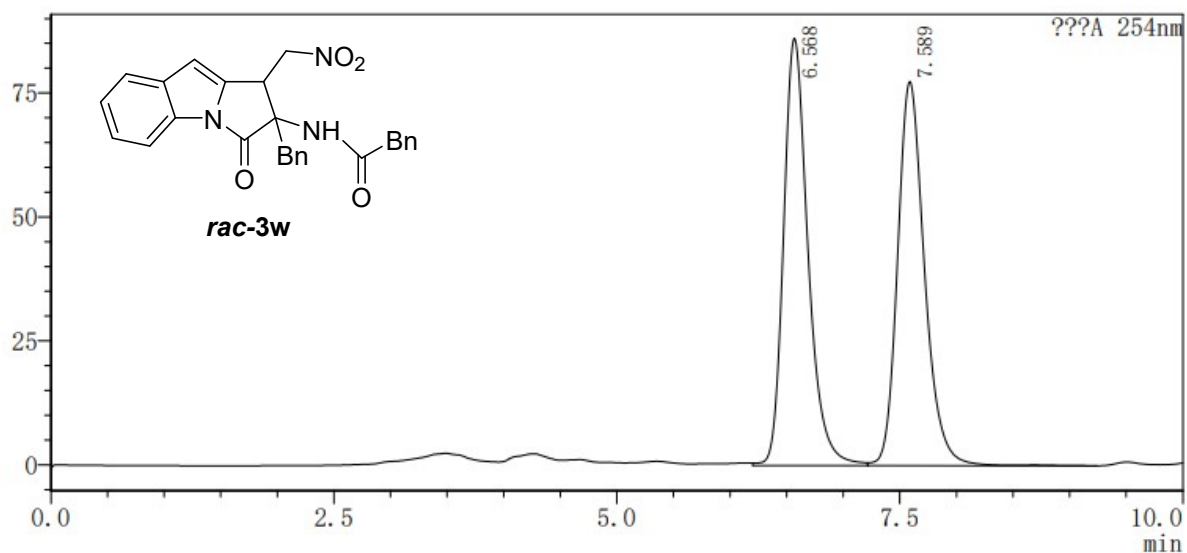

| Peak# | Ret. Time | Area    | Height | Area%   | Height% |
|-------|-----------|---------|--------|---------|---------|
| 1     | 6.568     | 1296409 | 86180  | 50.238  | 52.673  |
| 2     | 7.589     | 1284149 | 77435  | 49.762  | 47.327  |
| Total |           | 2580557 | 163615 | 100.000 | 100.000 |

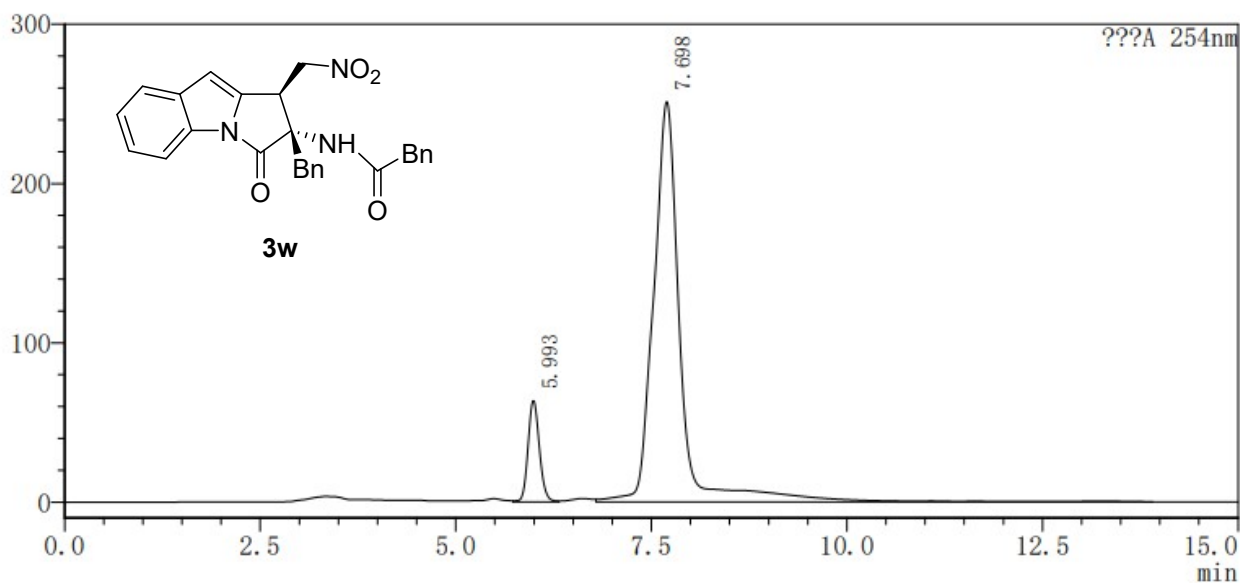

| Peak# | Ret. Time | Area    | Height | Area%   | Height% |
|-------|-----------|---------|--------|---------|---------|
| 1     | 5.993     | 630799  | 63539  | 9.535   | 20.177  |
| 2     | 7.698     | 5985153 | 251370 | 90.465  | 79.823  |
| Total |           | 6615952 | 314909 | 100.000 | 100.000 |

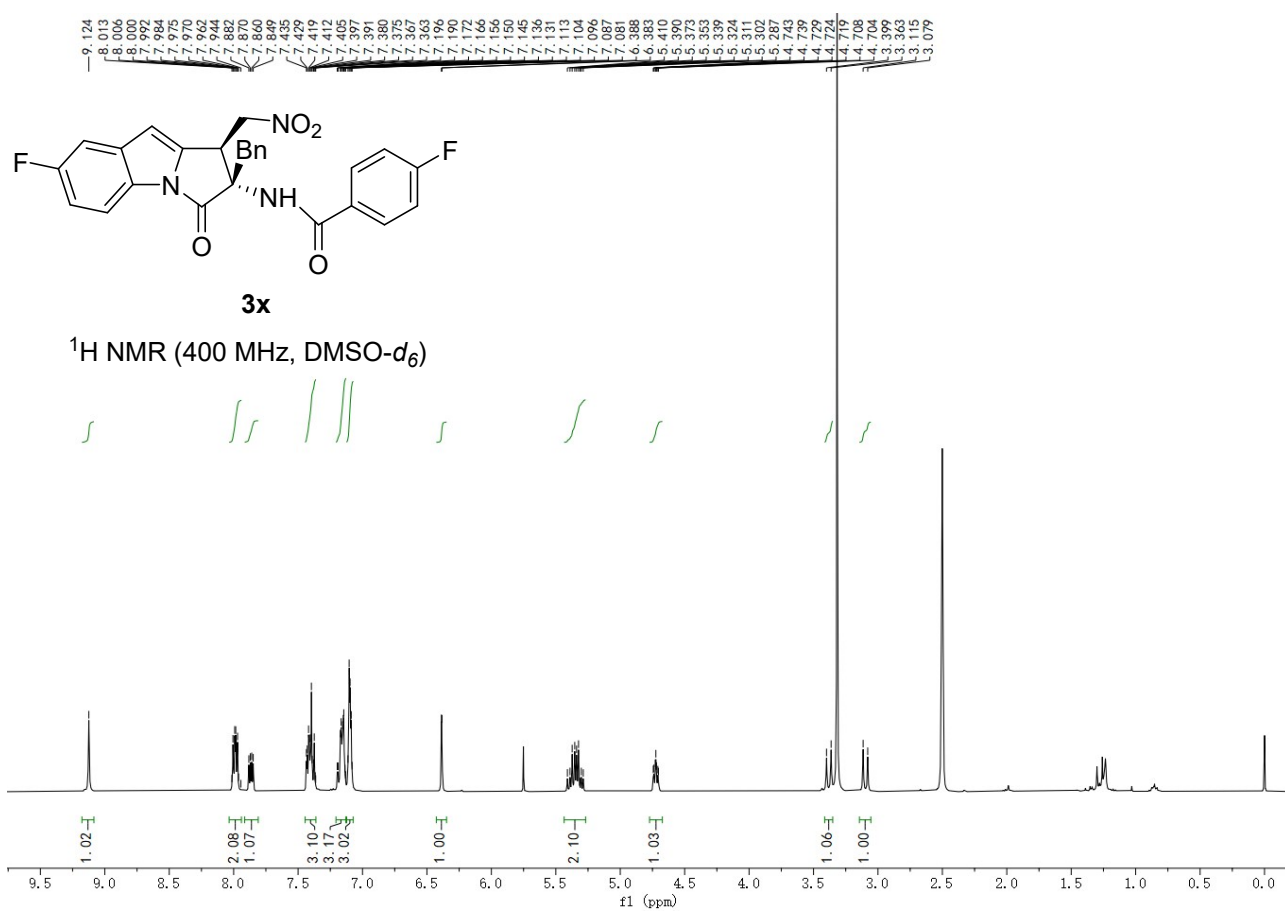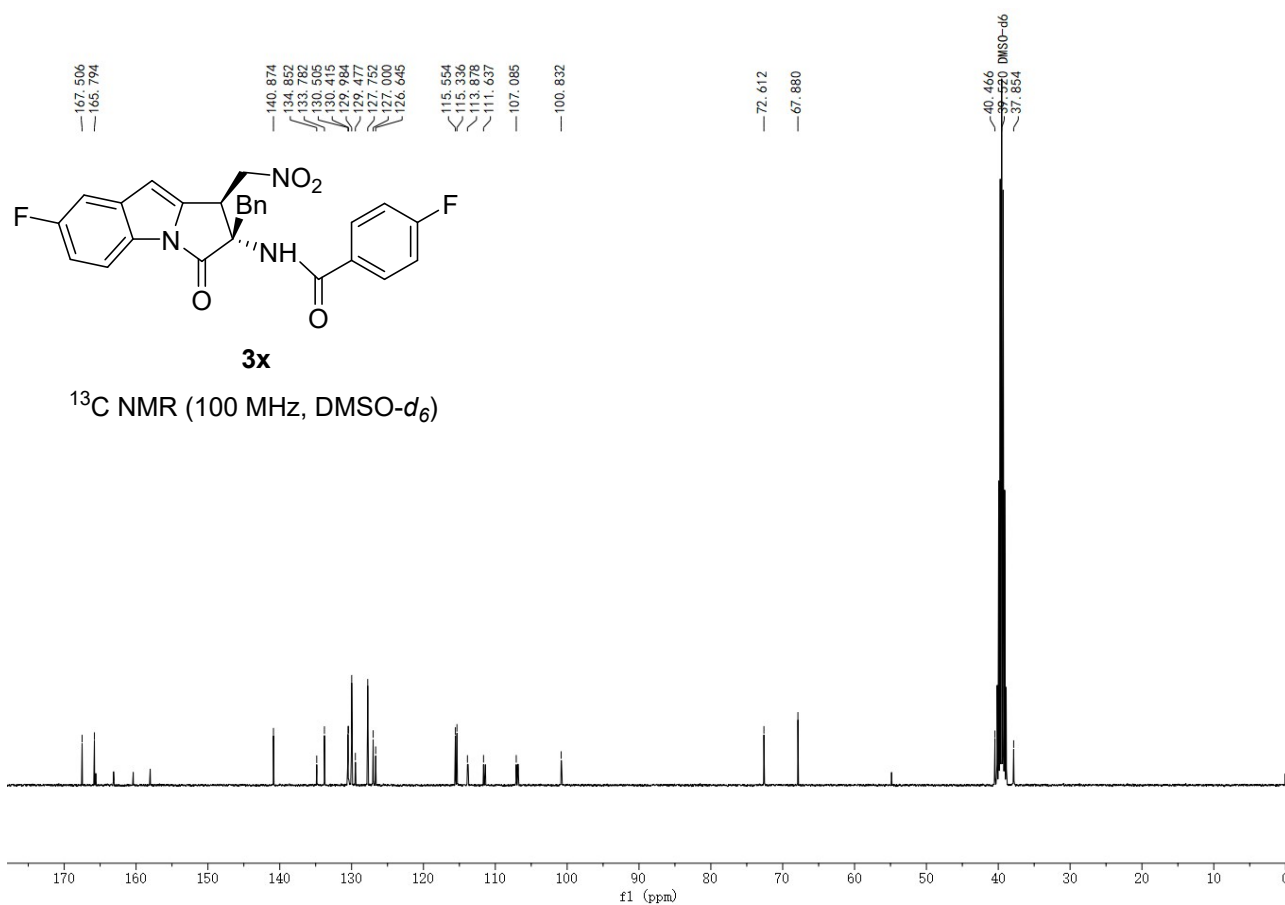

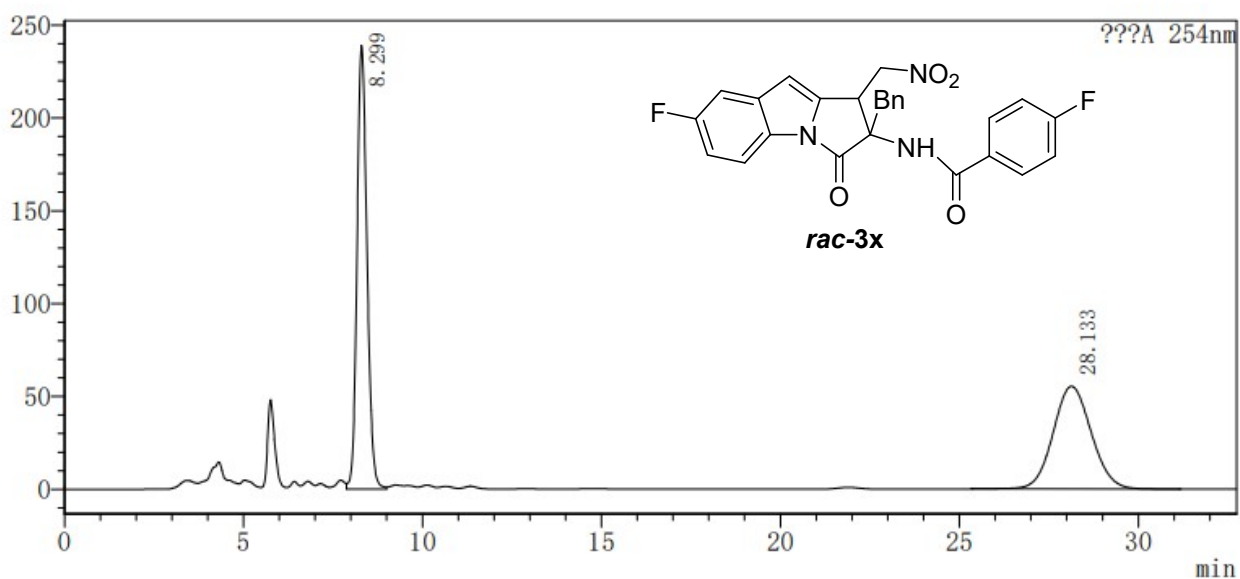

| Peak# | Ret. Time | Area    | Height | Area%   | Height% |
|-------|-----------|---------|--------|---------|---------|
| 1     | 8.299     | 4626549 | 238918 | 52.919  | 81.189  |
| 2     | 28.133    | 4116109 | 55356  | 47.081  | 18.811  |
| Total |           | 8742658 | 294274 | 100.000 | 100.000 |

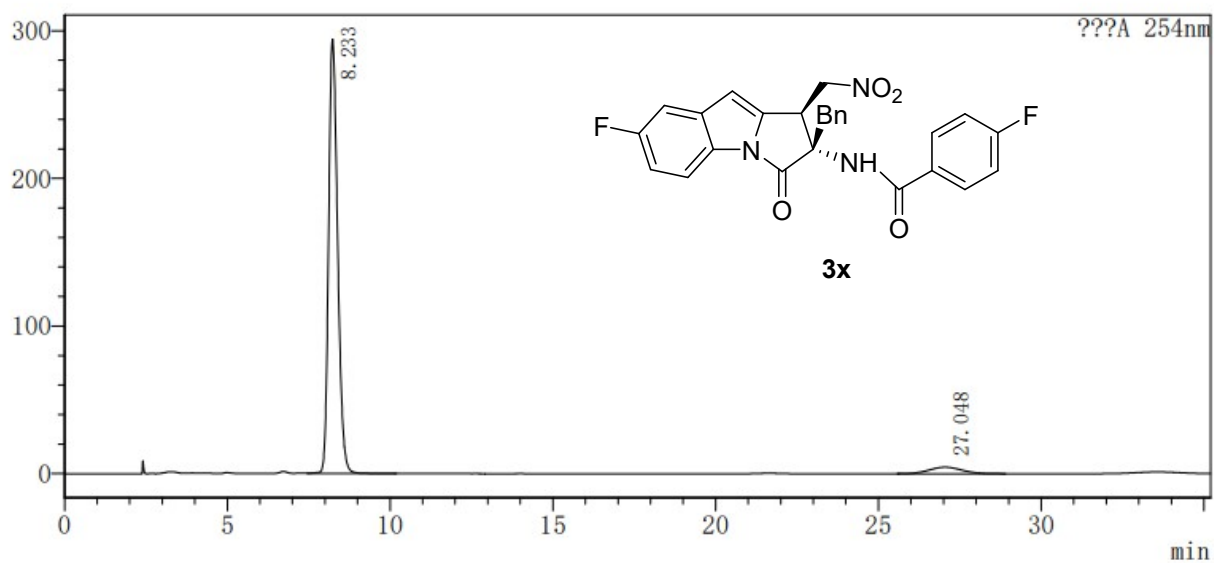

| Peak# | Ret. Time | Area    | Height | Area%   | Height% |
|-------|-----------|---------|--------|---------|---------|
| 1     | 8.233     | 5689704 | 294208 | 94.892  | 98.534  |
| 2     | 27.048    | 306279  | 4376   | 5.108   | 1.466   |
| Total |           | 5995983 | 298584 | 100.000 | 100.000 |

8.943  
7.930  
7.925  
7.922  
7.918  
7.908  
7.904  
7.900  
7.673  
7.664  
7.636  
7.633  
7.629  
7.627  
7.615  
7.615  
7.609  
7.603  
7.600  
7.596  
7.593  
7.561  
7.556  
7.545  
7.540  
7.528  
7.524  
7.520  
7.414  
7.411  
7.409  
7.394  
7.388  
7.380  
7.184  
7.165  
7.146  
7.146  
7.048  
7.045  
7.032  
7.028  
6.938  
6.933  
6.925  
6.921  
6.914  
6.908  
6.899  
6.895  
6.882  
6.798  
6.794  
6.791  
6.782  
6.774  
6.773  
6.713  
6.696  
6.676  
6.480  
5.471  
5.444  
5.435  
5.315  
5.306  
5.285  
5.266  
3.221  
3.185  
3.020  
2.984

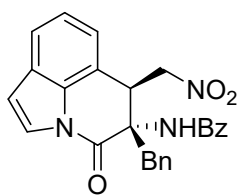

**5a**

$^1\text{H}$  NMR (400 MHz,  $\text{DMSO}-d_6$ )

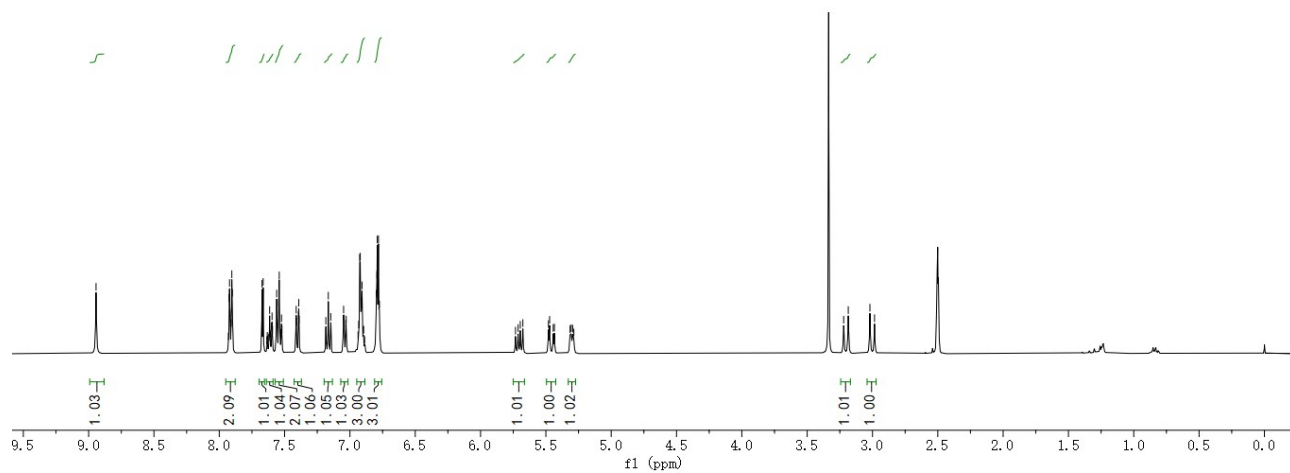

167.023  
164.199  
133.712  
133.264  
132.647  
131.849  
129.345  
128.366  
127.697  
127.015  
127.294  
126.778  
123.715  
122.135  
120.387  
119.685  
118.951  
110.688  
74.261  
64.360  
40.553  
39.520  
38.609

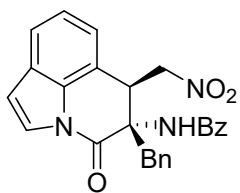

**5a**

$^{13}\text{C}$  NMR (100 MHz,  $\text{DMSO}-d_6$ )

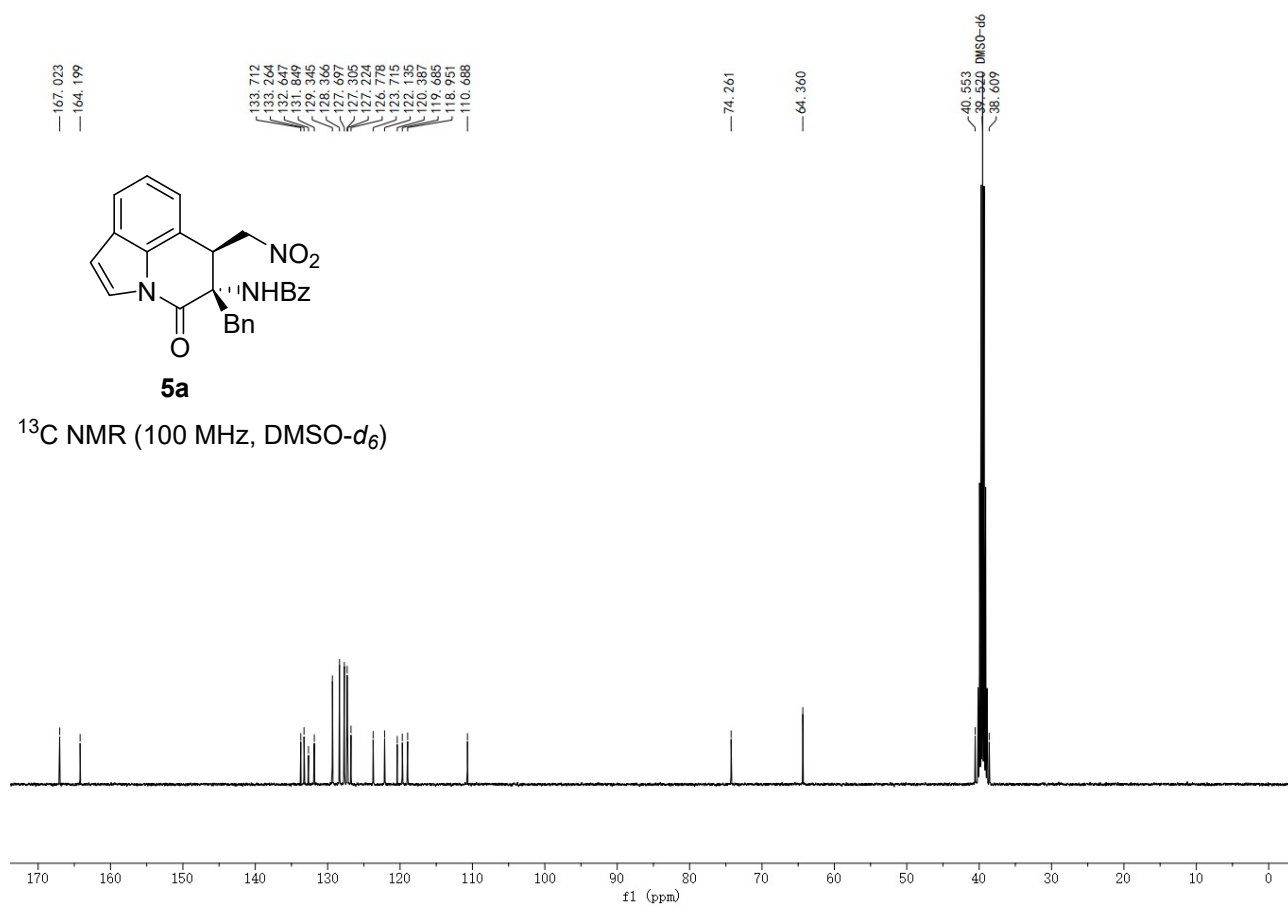

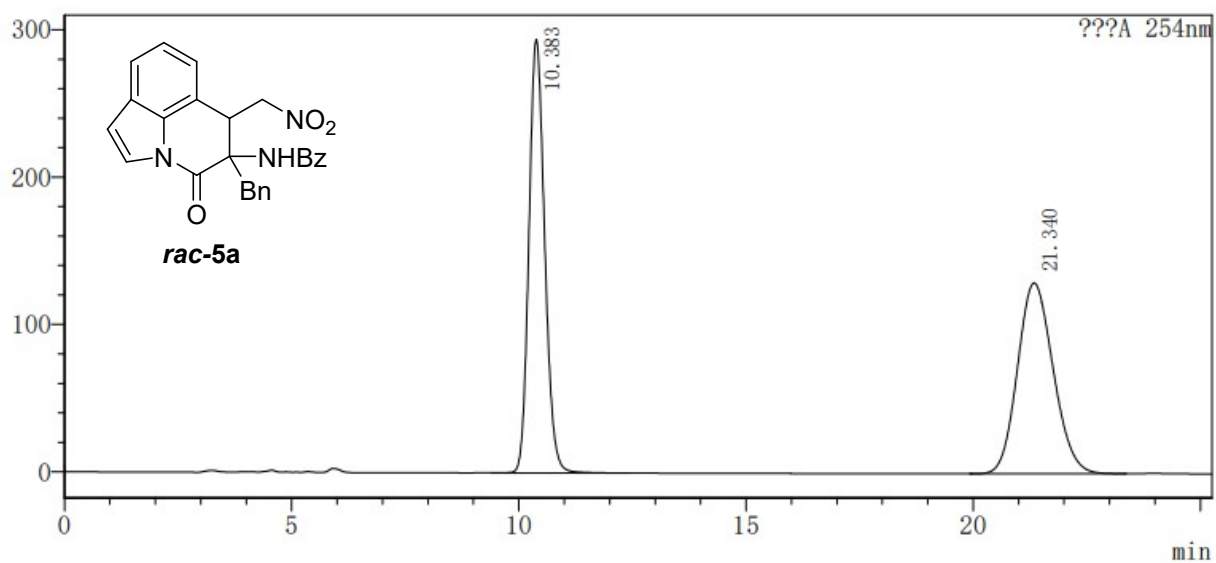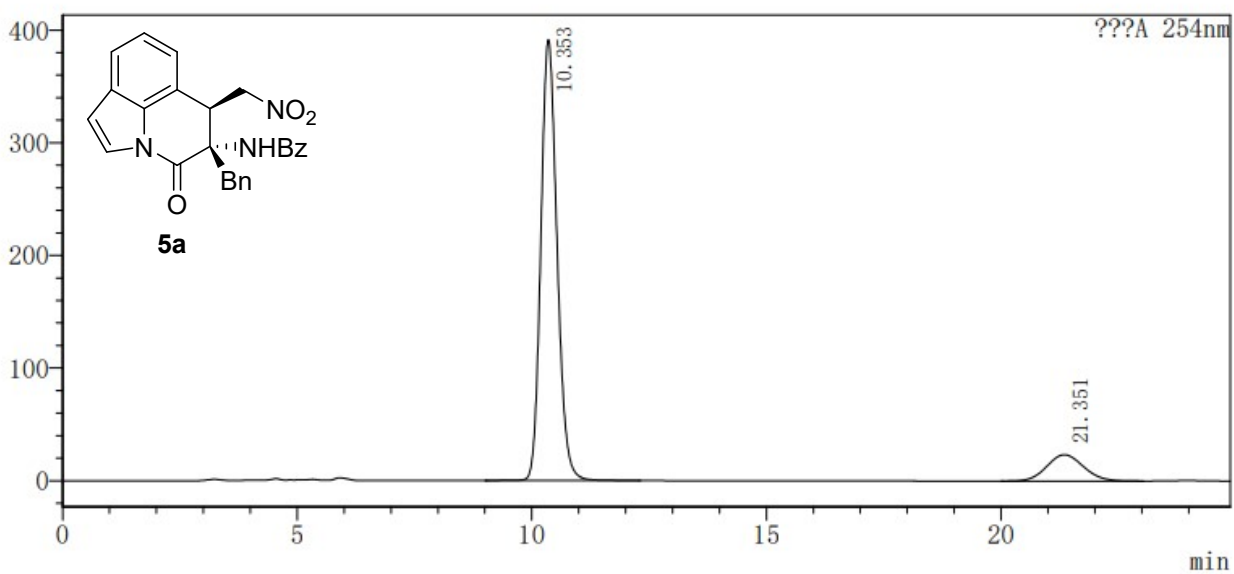

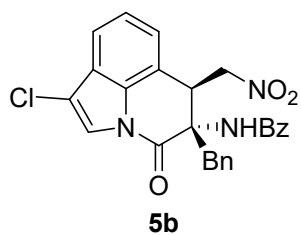

$^1\text{H}$  NMR (400 MHz,  $\text{DMSO}-d_6$ )

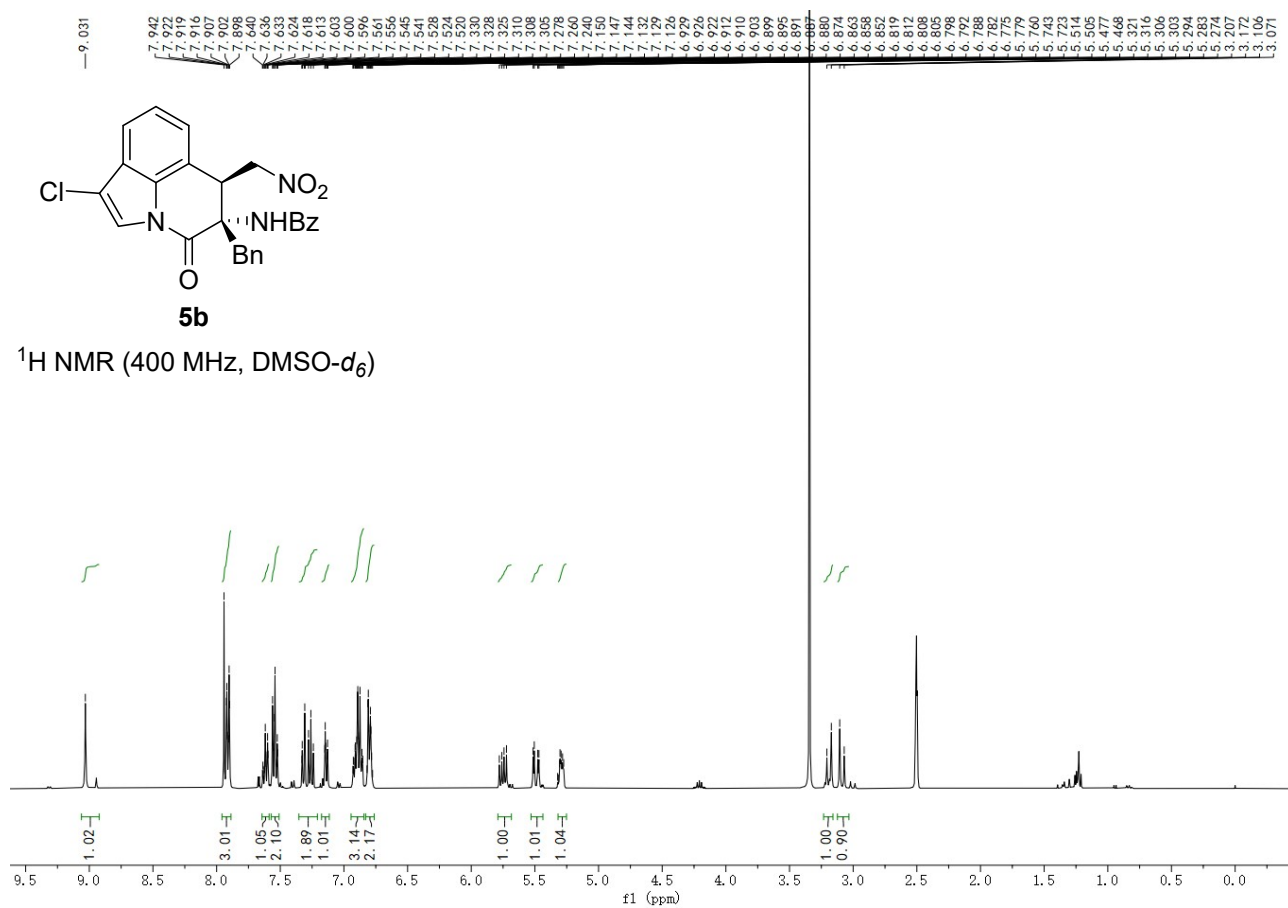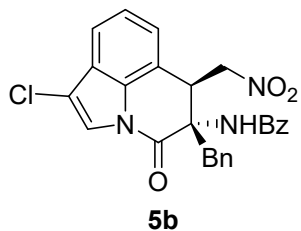

$^{13}\text{C}$  NMR (100 MHz,  $\text{DMSO}-d_6$ )

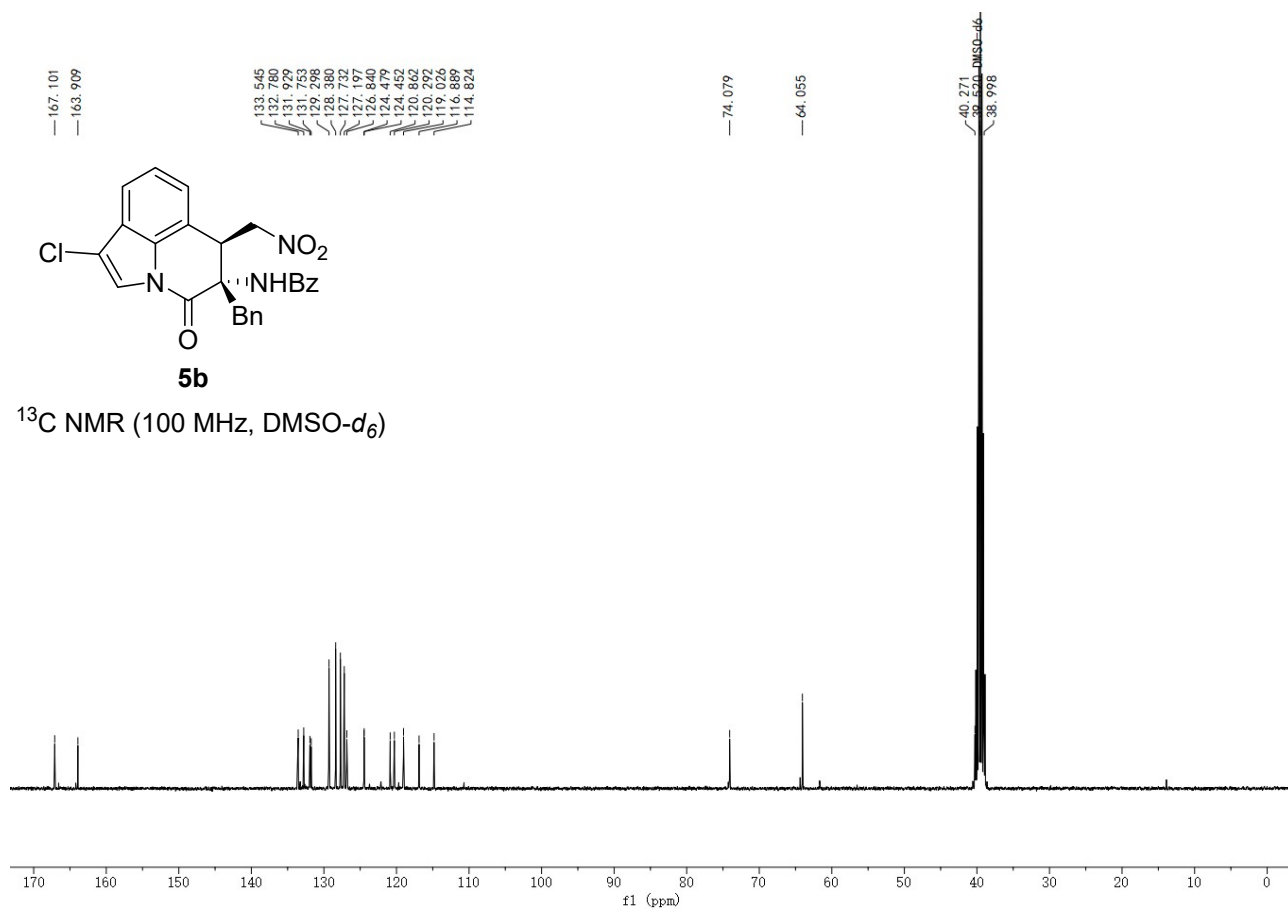

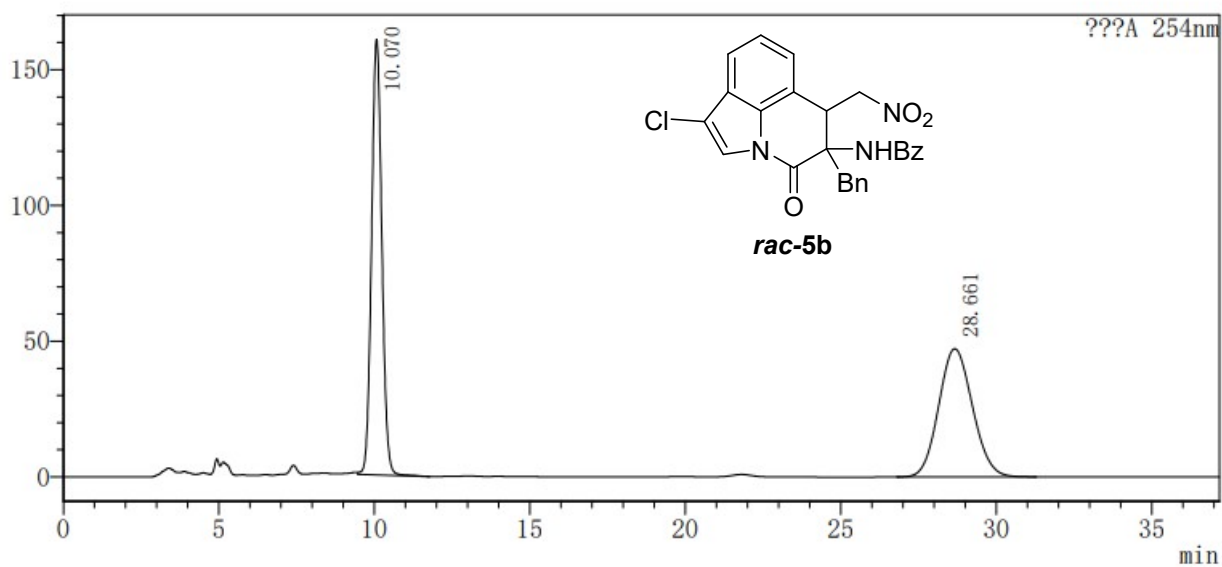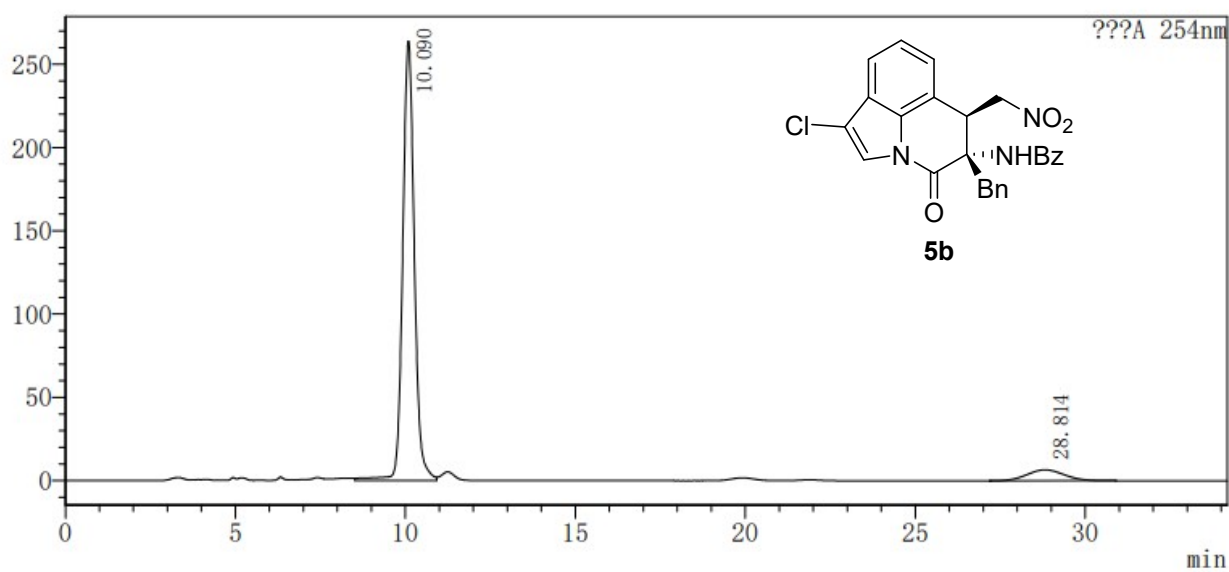

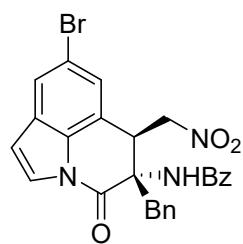

**5c**

$^1\text{H}$  NMR (400 MHz,  $\text{DMSO}-d_6$ )

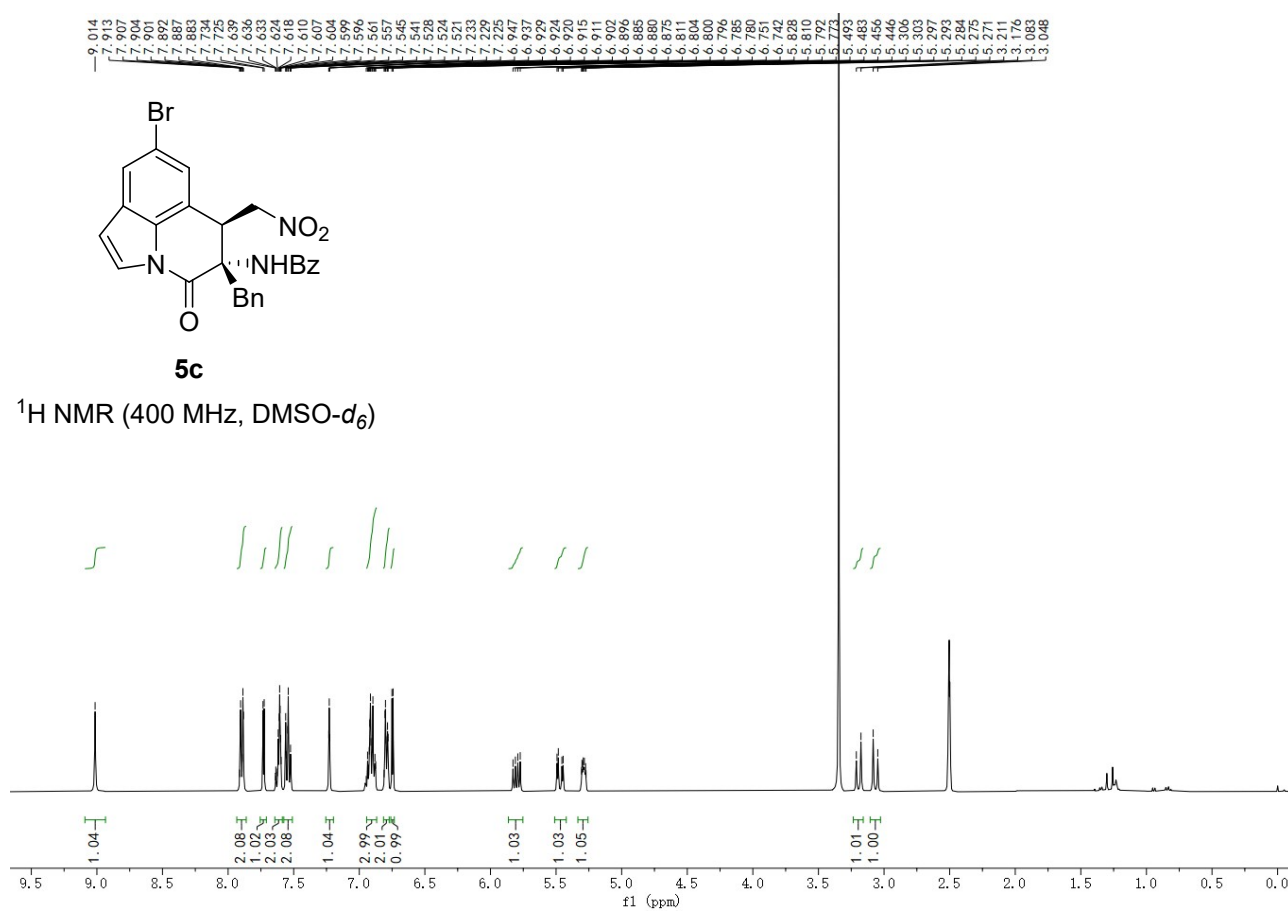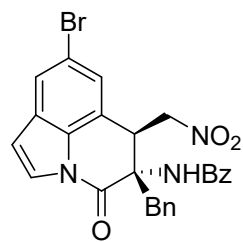

**5c**

$^{13}\text{C}$  NMR (100 MHz,  $\text{DMSO}-d_6$ )

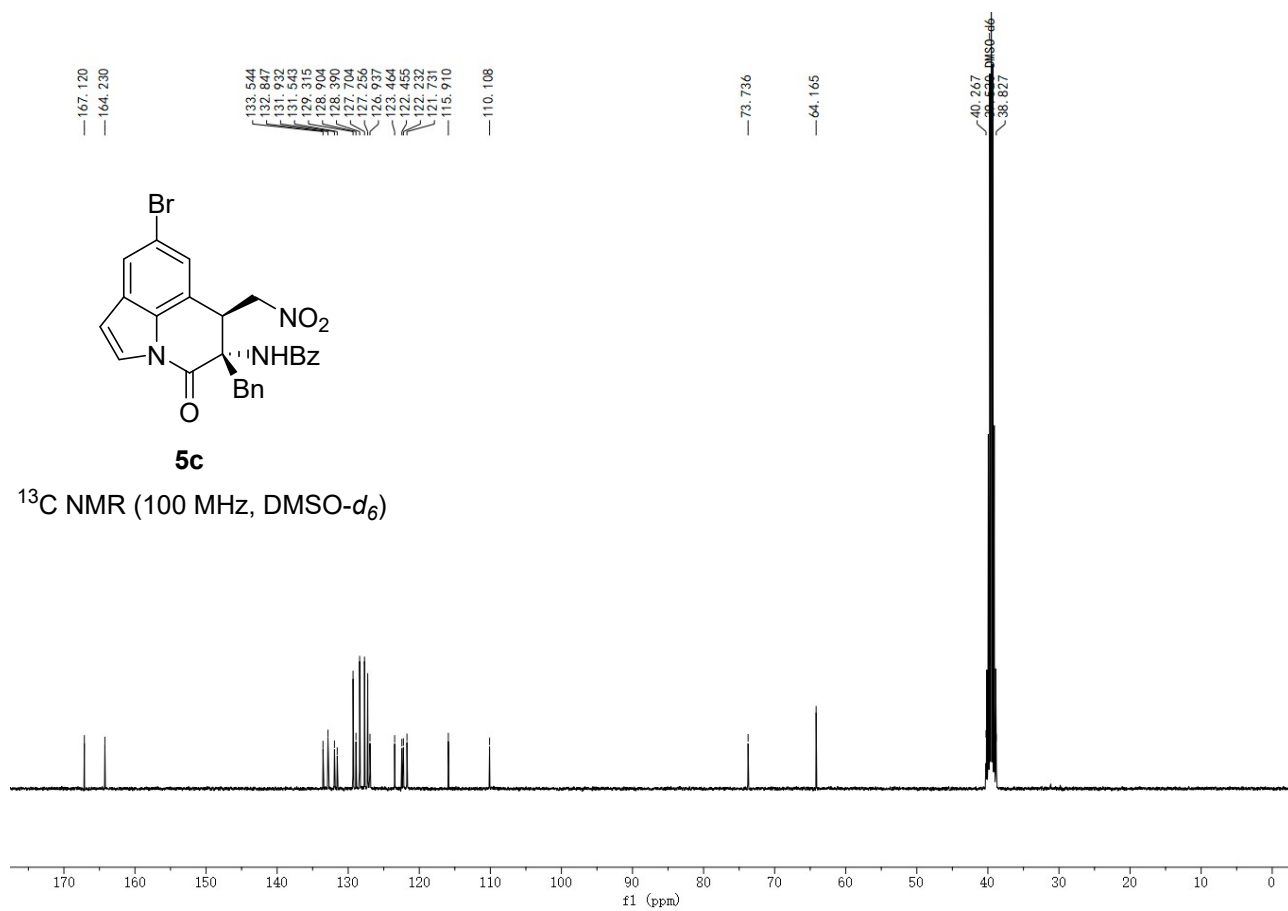

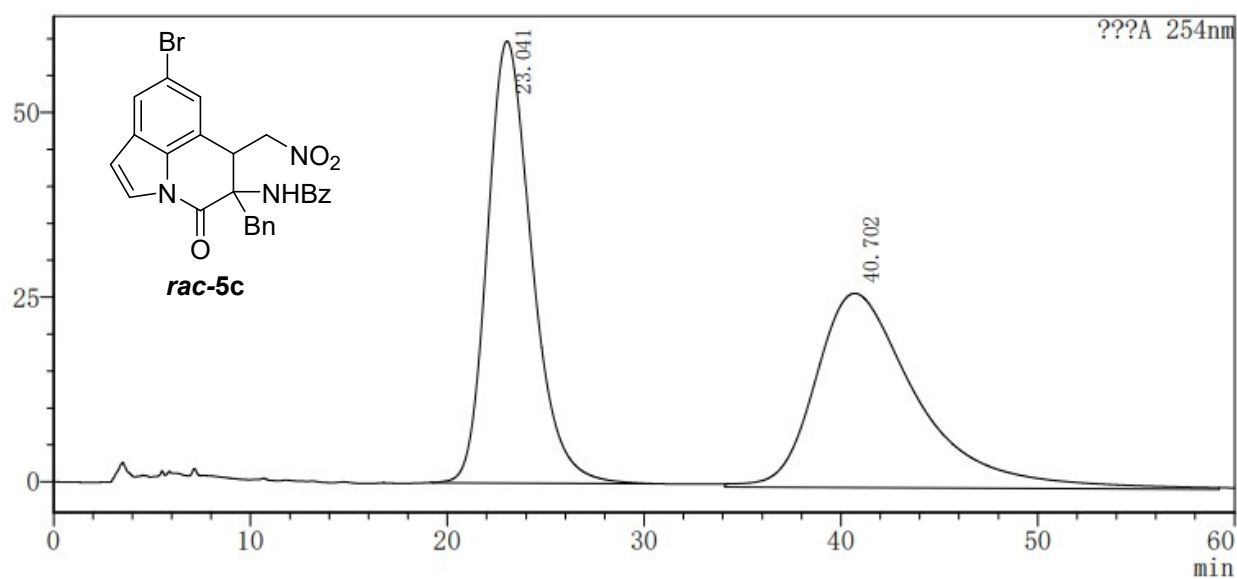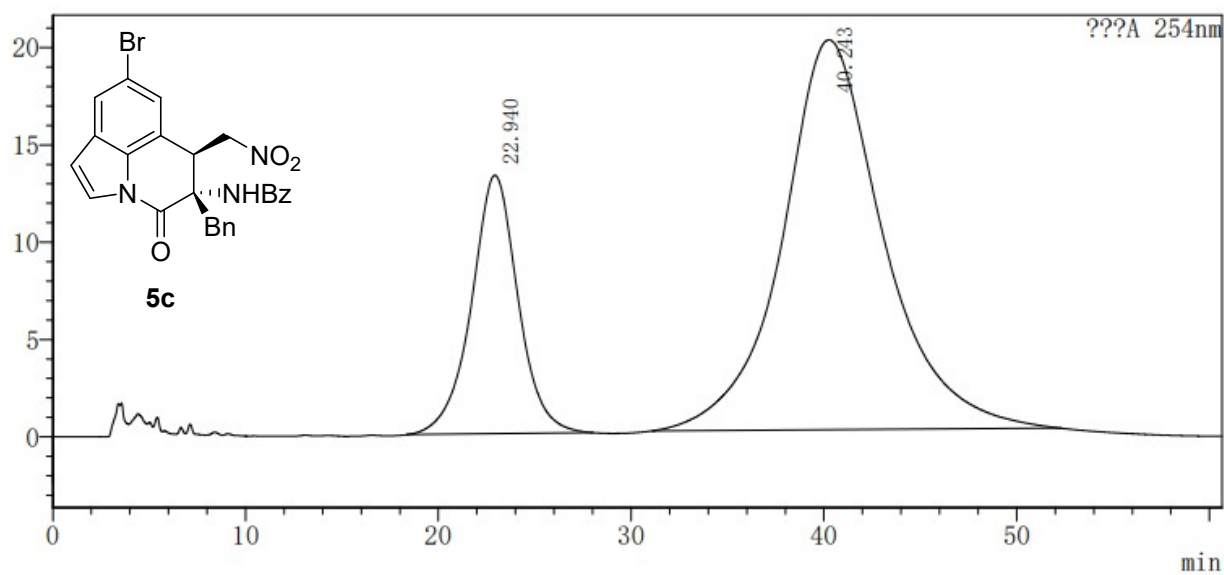

| Peak# | Ret. Time | Area    | Height | Area%   | Height% |
|-------|-----------|---------|--------|---------|---------|
| 1     | 22.940    | 2235851 | 13280  | 23.449  | 39.868  |
| 2     | 40.243    | 7298972 | 20030  | 76.551  | 60.132  |
| Total |           | 9534824 | 33310  | 100.000 | 100.000 |

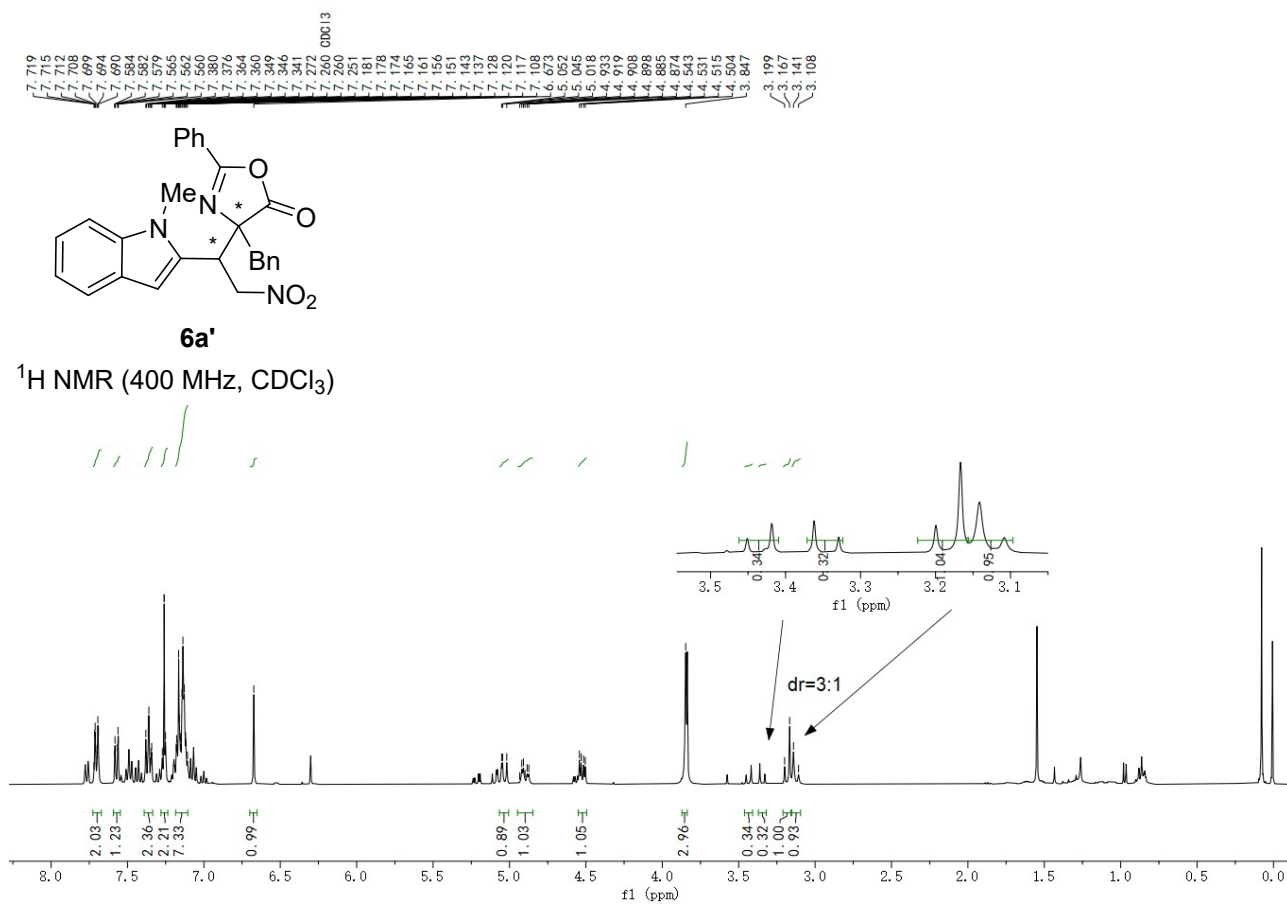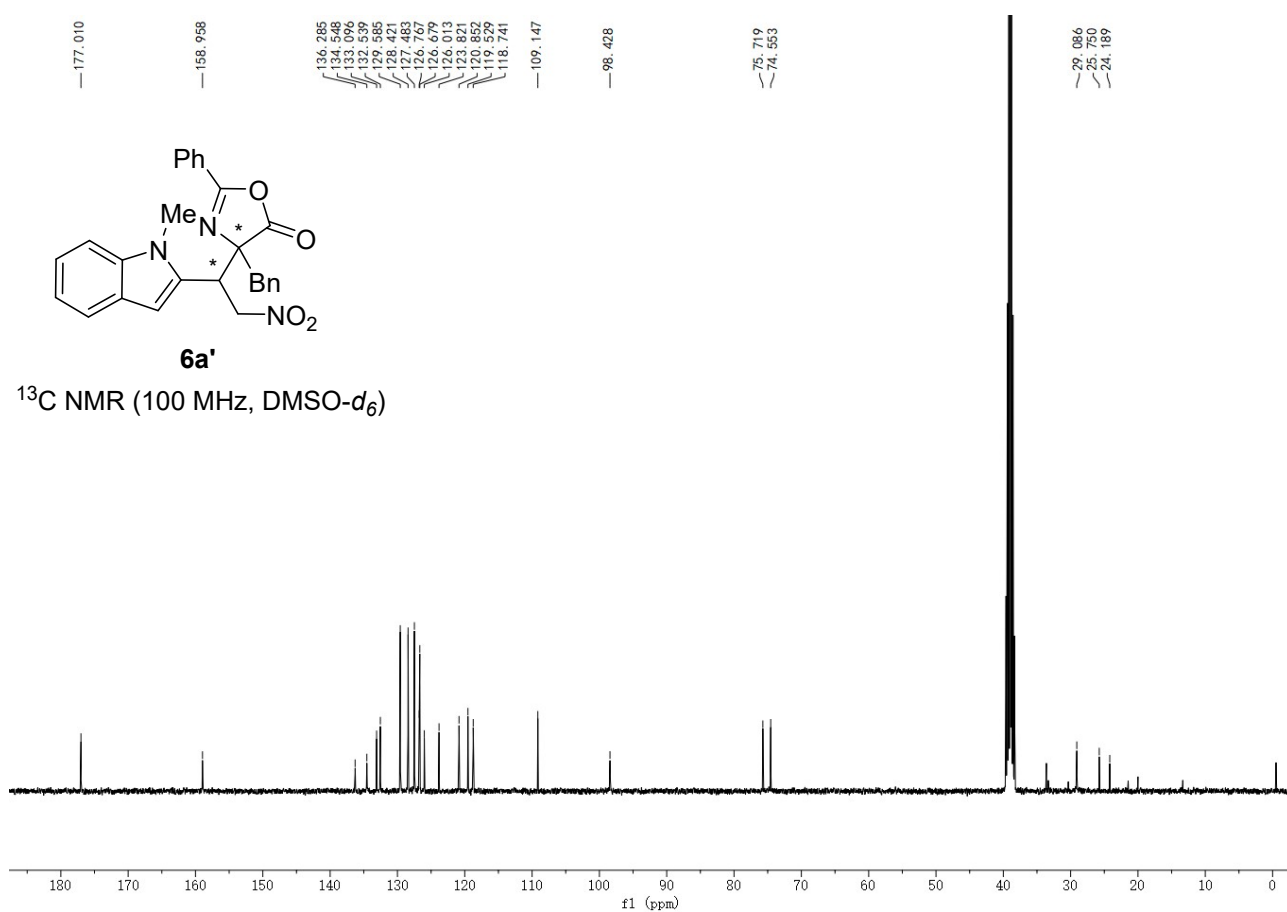

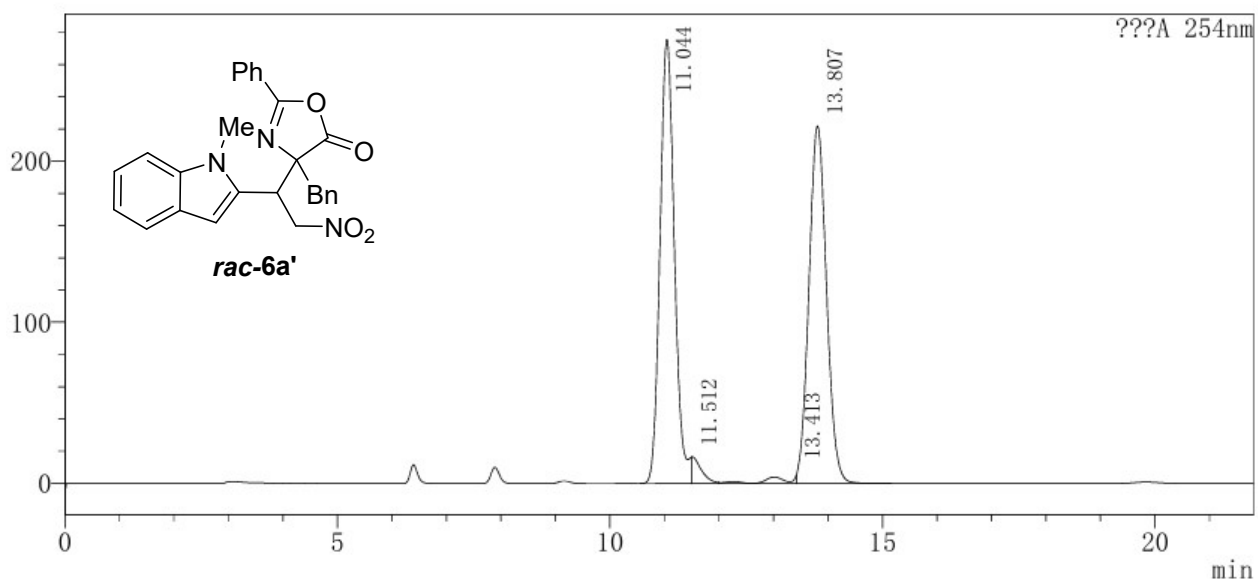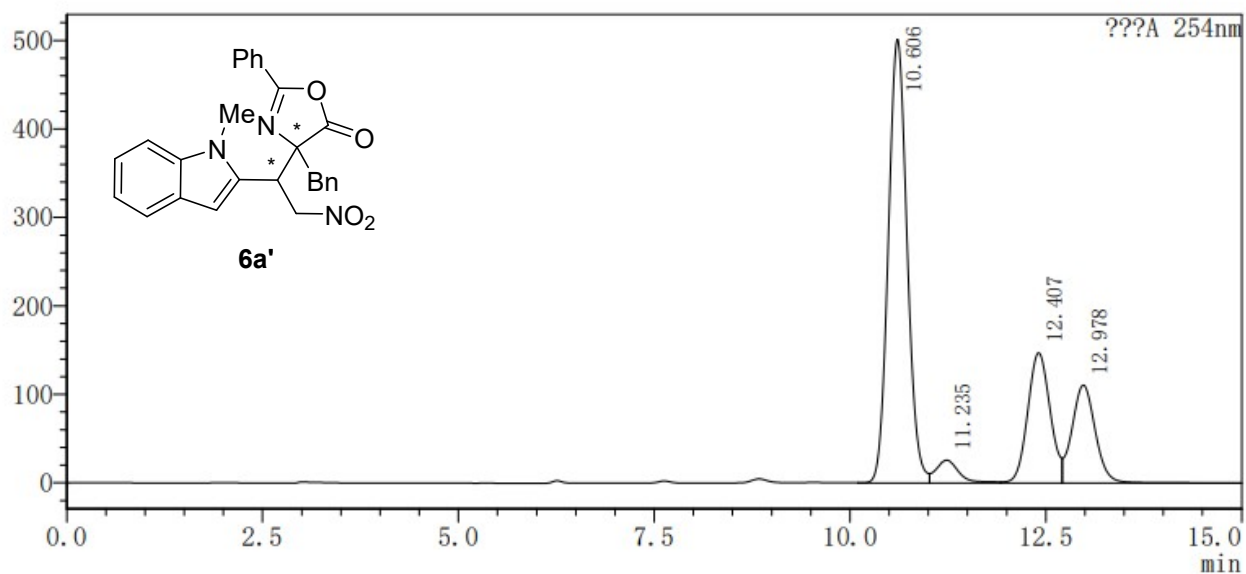

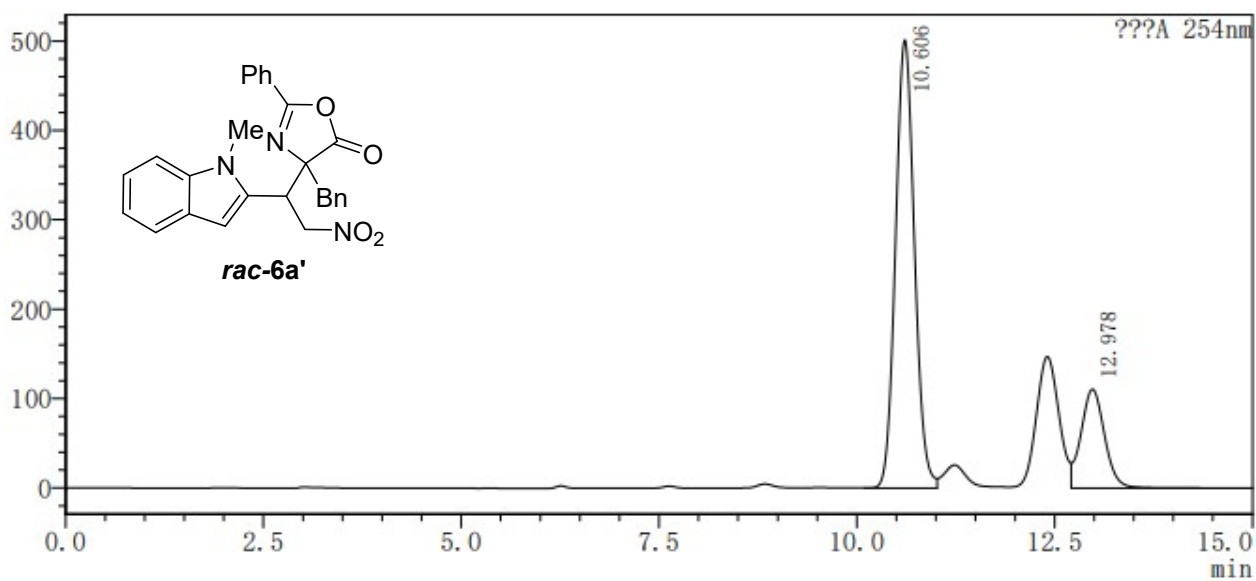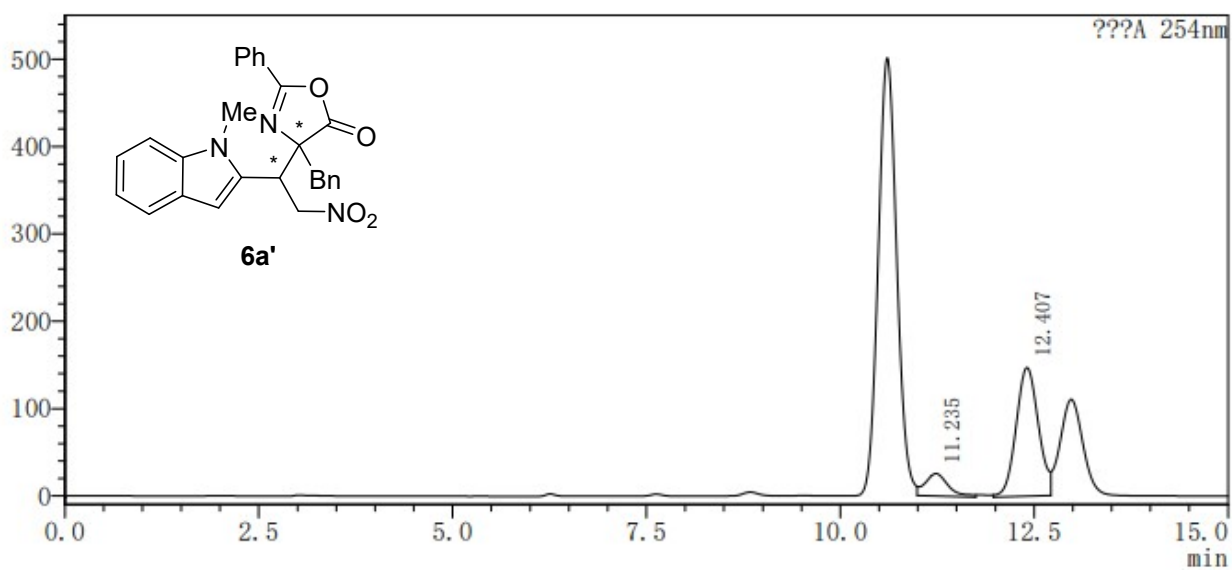

8.883, 7.851, 7.848, 7.845, 7.836, 7.831, 7.827, 7.824, 7.740, 7.737, 7.734, 7.725, 7.720, 7.716, 7.482, 7.478, 7.474, 7.470, 7.463, 7.455, 7.448, 7.445, 7.440, 7.437, 7.433, 7.430, 7.429, 7.389, 7.387, 7.370, 7.366, 7.362, 7.358, 7.348, 7.342, 7.331, 7.327, 7.324, 7.306, 7.304, 7.285, 7.283, 7.278, 7.084, 7.081, 7.067, 7.064, 7.061, 7.054, 7.050, 7.047, 7.043, 7.041, 7.039, 7.031, 7.026, 7.013, 7.005, 6.977, 6.952, 6.950, 6.948, 6.933, 6.930, 6.913, 6.908, 4.346, 4.344, 4.342, 4.322, 4.320, 3.701, 3.678, 3.659, 3.655, 3.653, 3.493, 3.459, 3.450, 3.193, 3.160, 3.084, 3.051

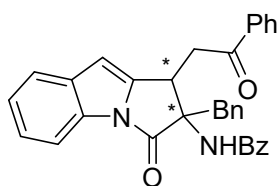

**8a**

$^1\text{H}$  NMR (400 MHz,  $\text{CDCl}_3$ )

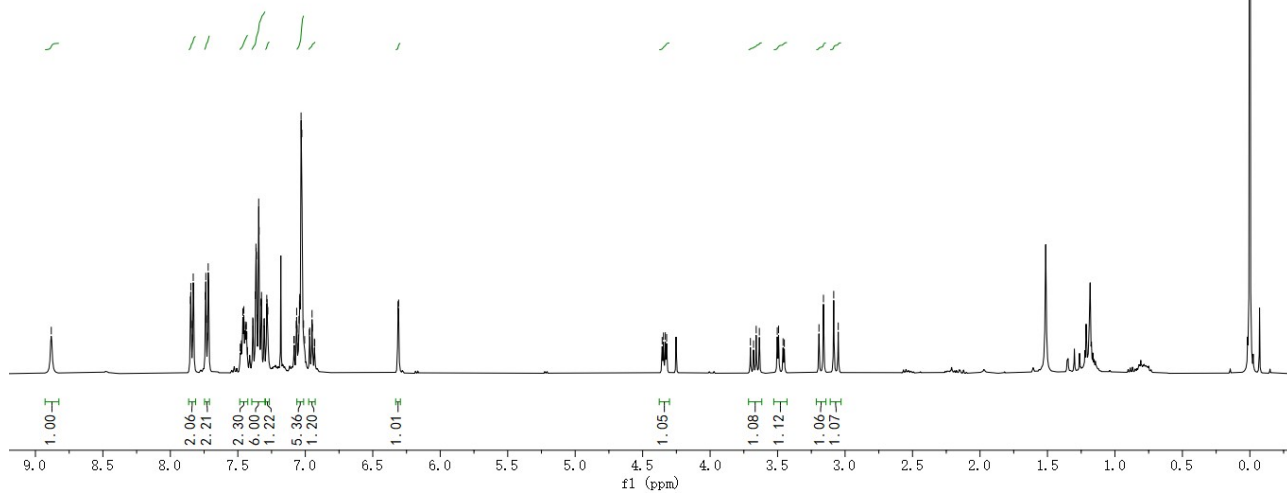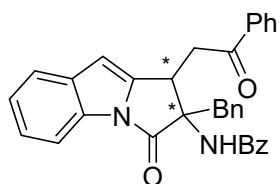

**8a**

$^{13}\text{C}$  NMR (100 MHz,  $\text{CDCl}_3$ )

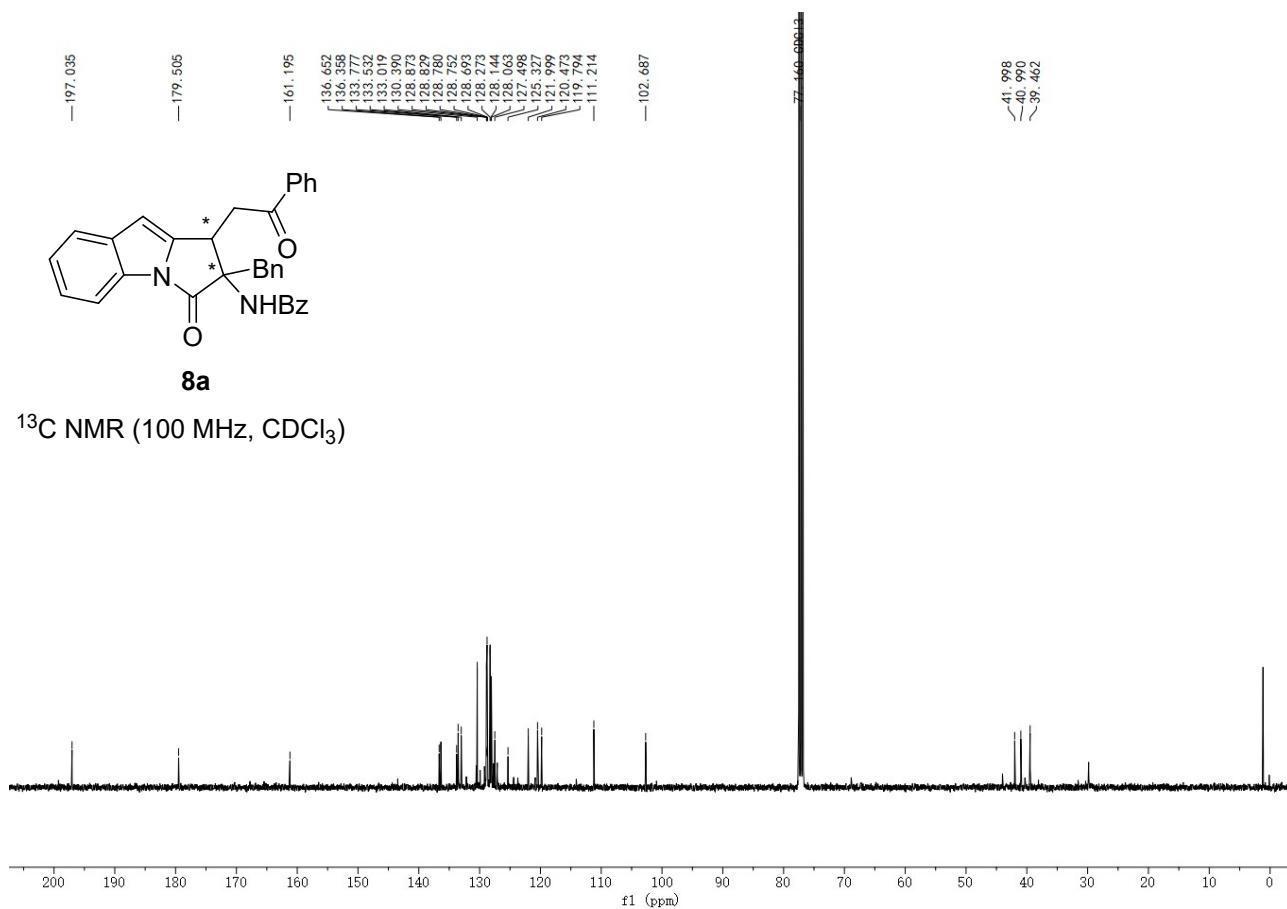

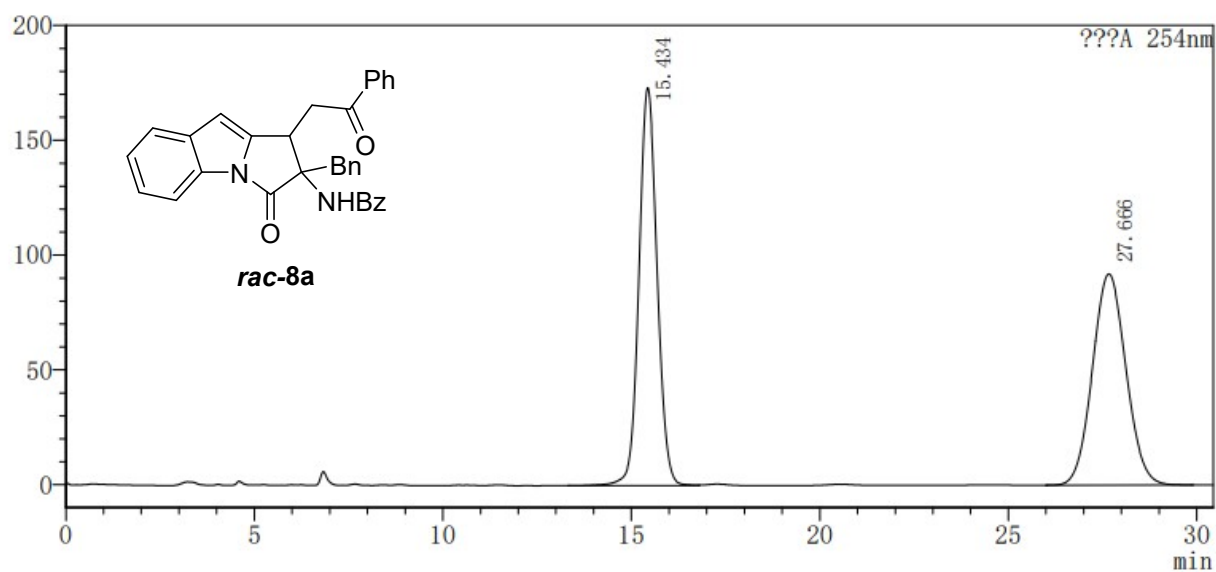

| Peak# | Ret. Time | Area     | Height | Area%   | Height% |
|-------|-----------|----------|--------|---------|---------|
| 1     | 15.434    | 5822430  | 173242 | 50.614  | 65.324  |
| 2     | 27.666    | 5681104  | 91963  | 49.386  | 34.676  |
| Total |           | 11503534 | 265206 | 100.000 | 100.000 |

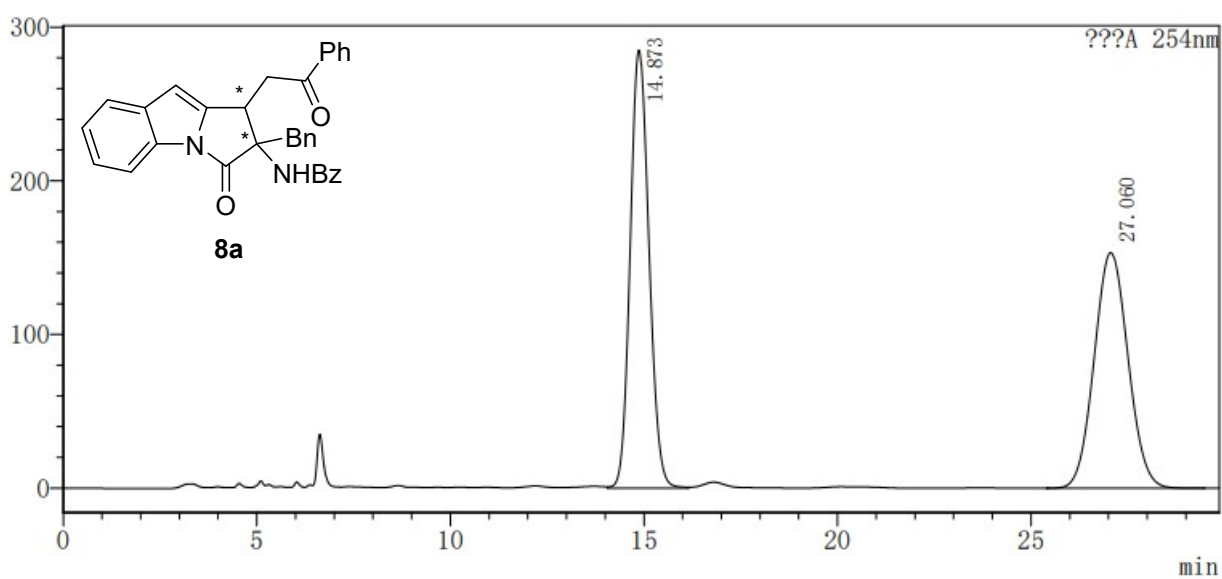

| Peak# | Ret. Time | Area     | Height | Area%   | Height% |
|-------|-----------|----------|--------|---------|---------|
| 1     | 14.873    | 9556465  | 285023 | 50.637  | 65.016  |
| 2     | 27.060    | 9315944  | 153367 | 49.363  | 34.984  |
| Total |           | 18872409 | 438390 | 100.000 | 100.000 |

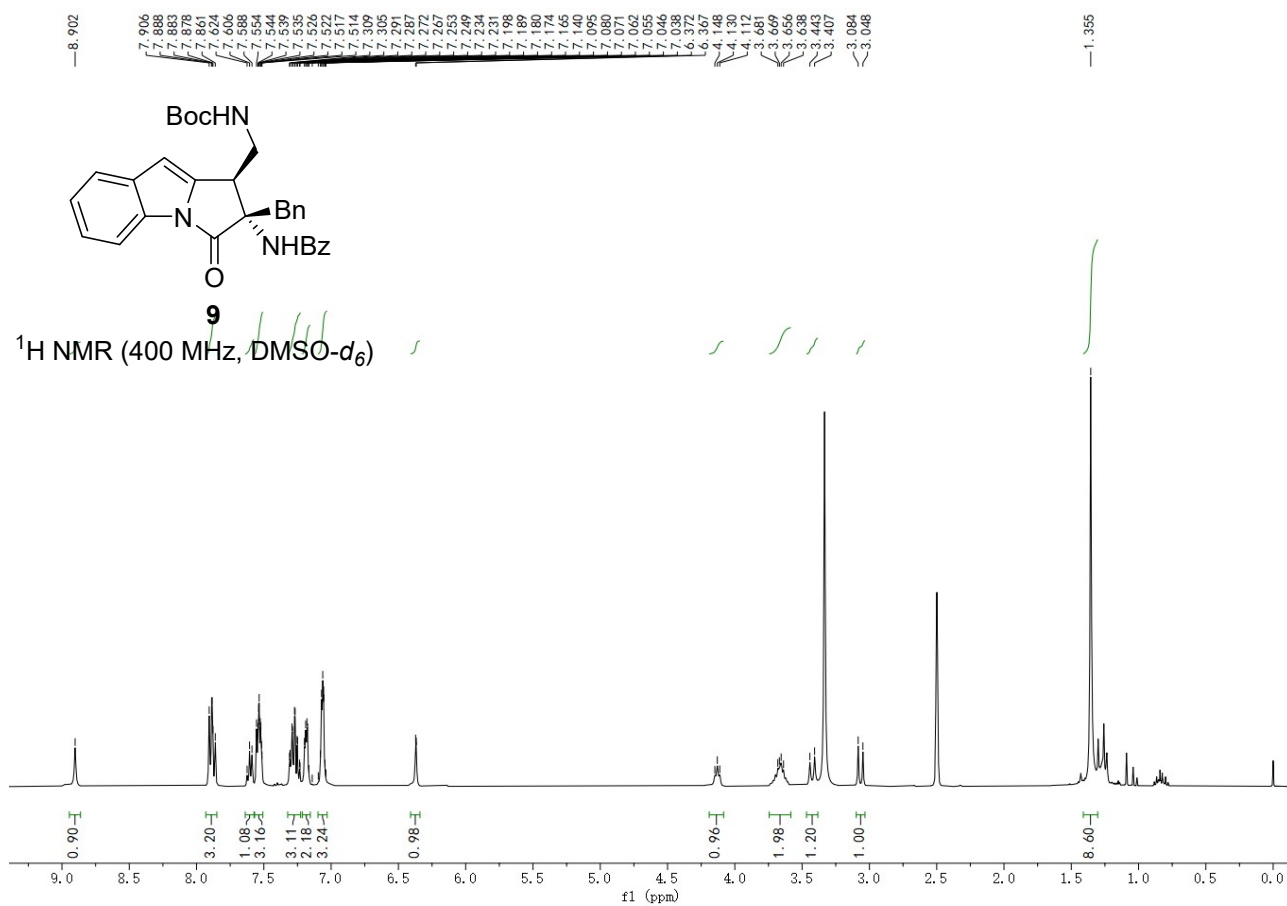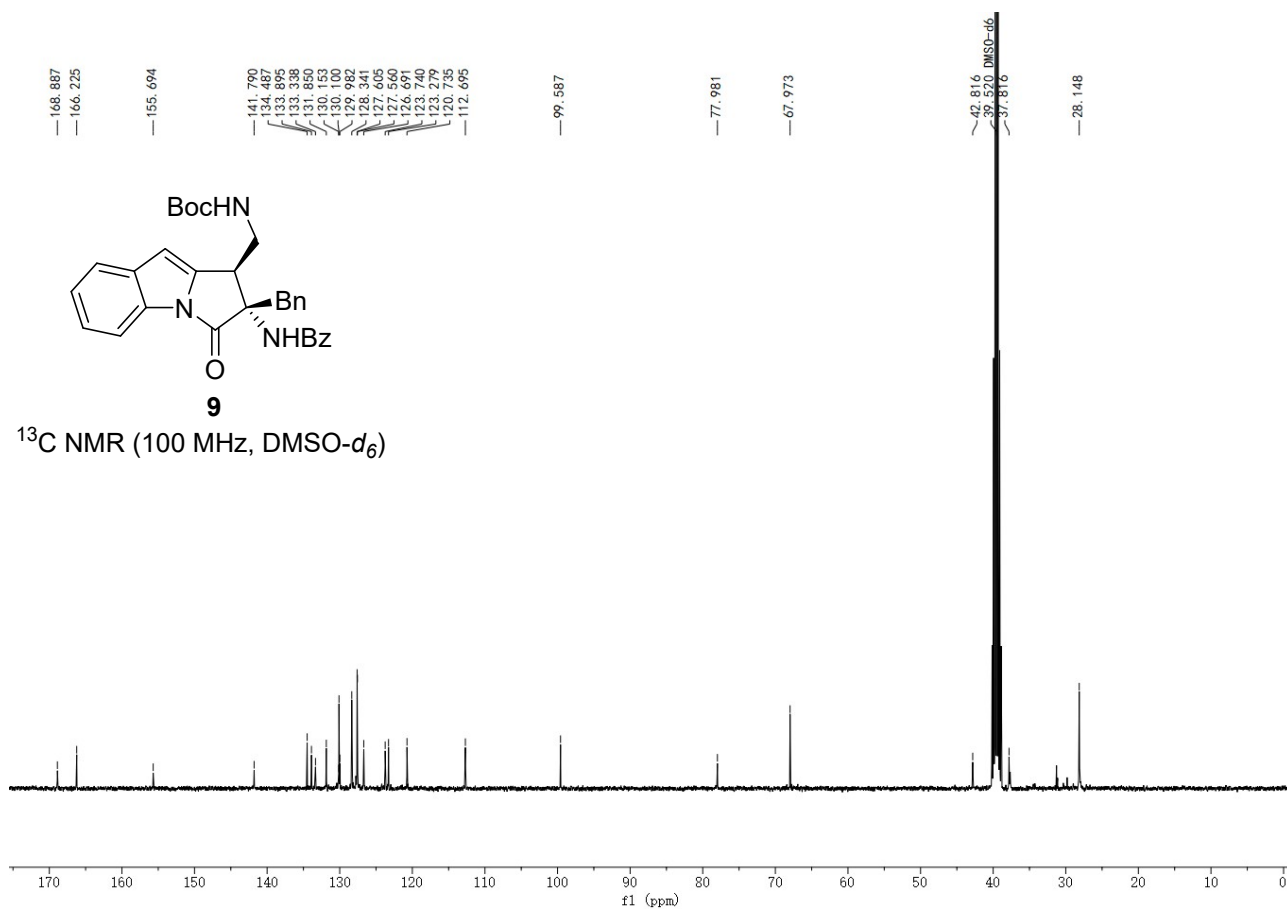

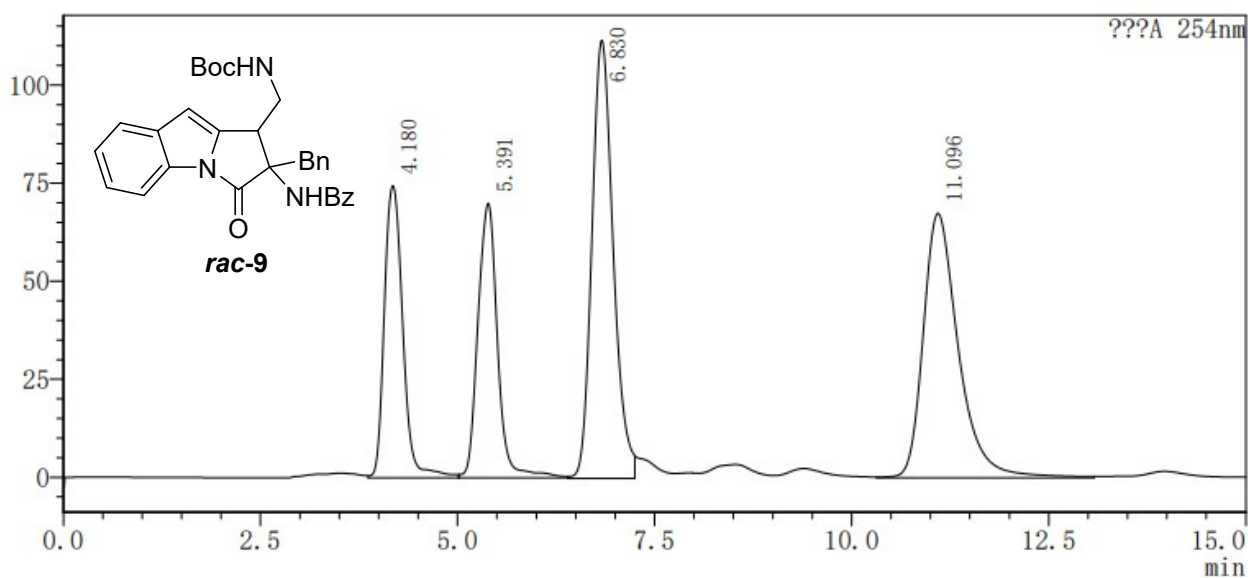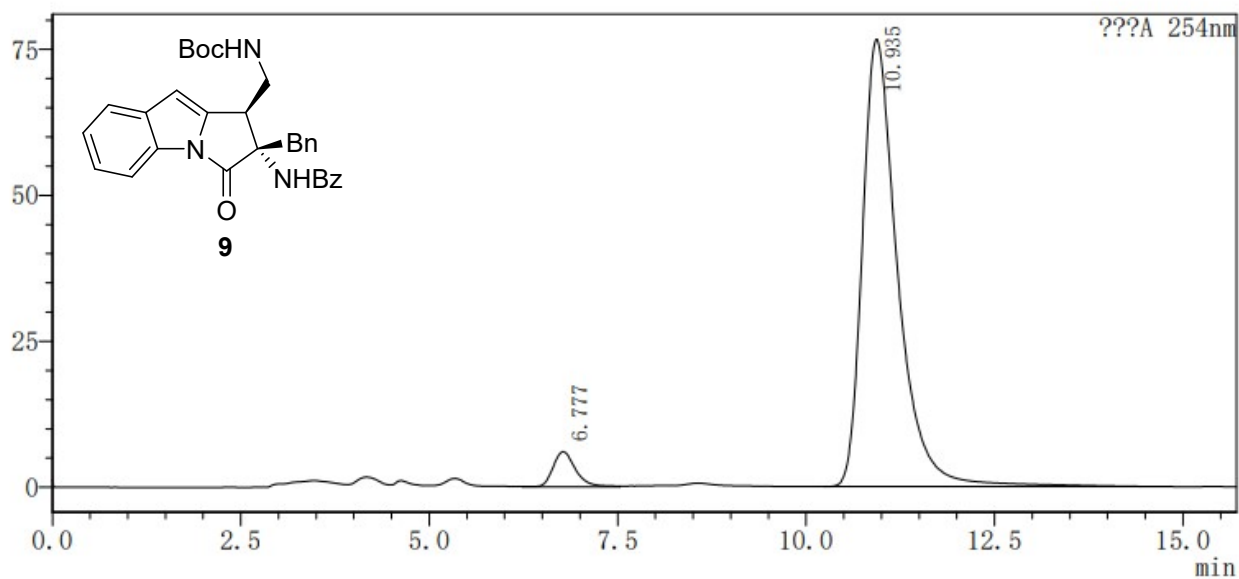

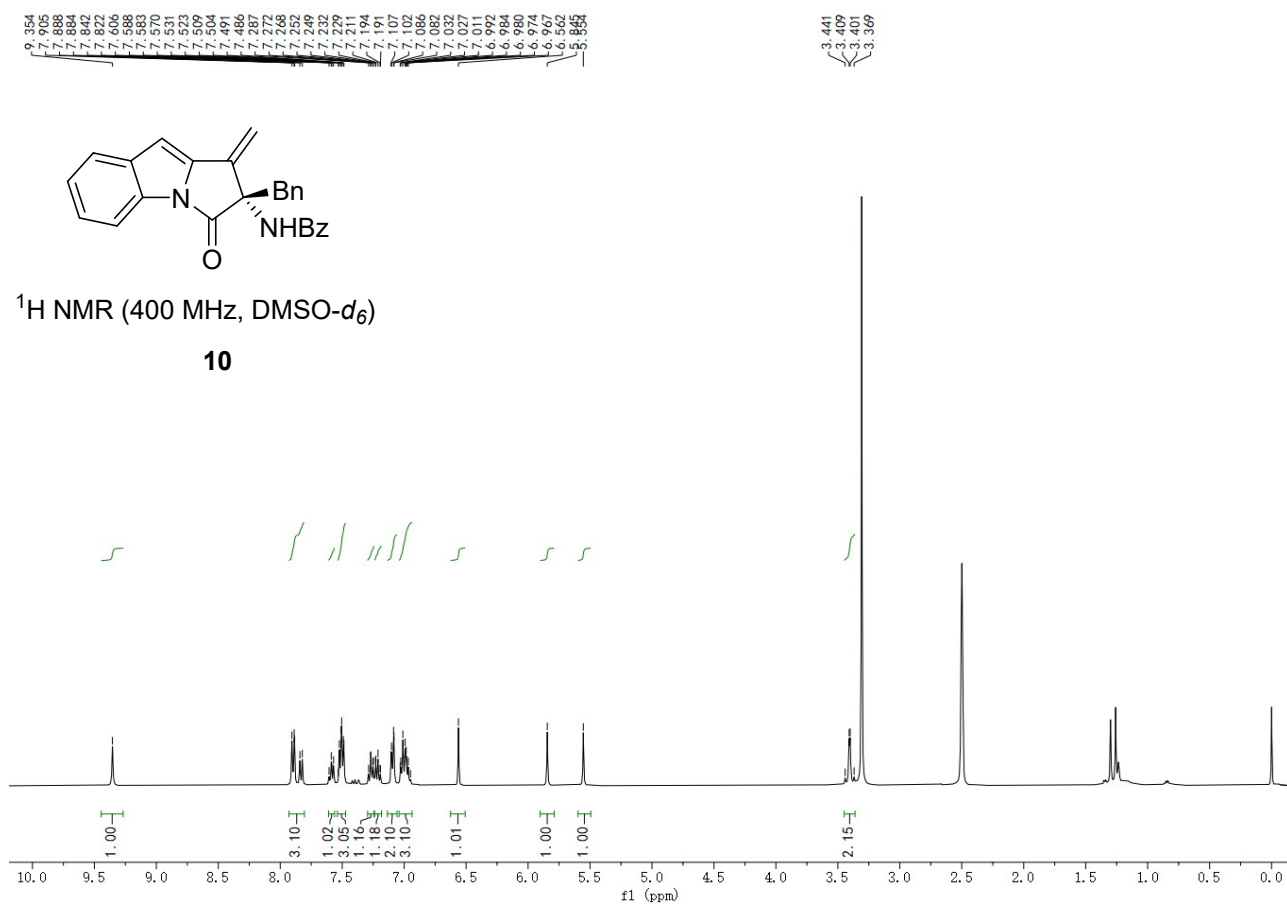

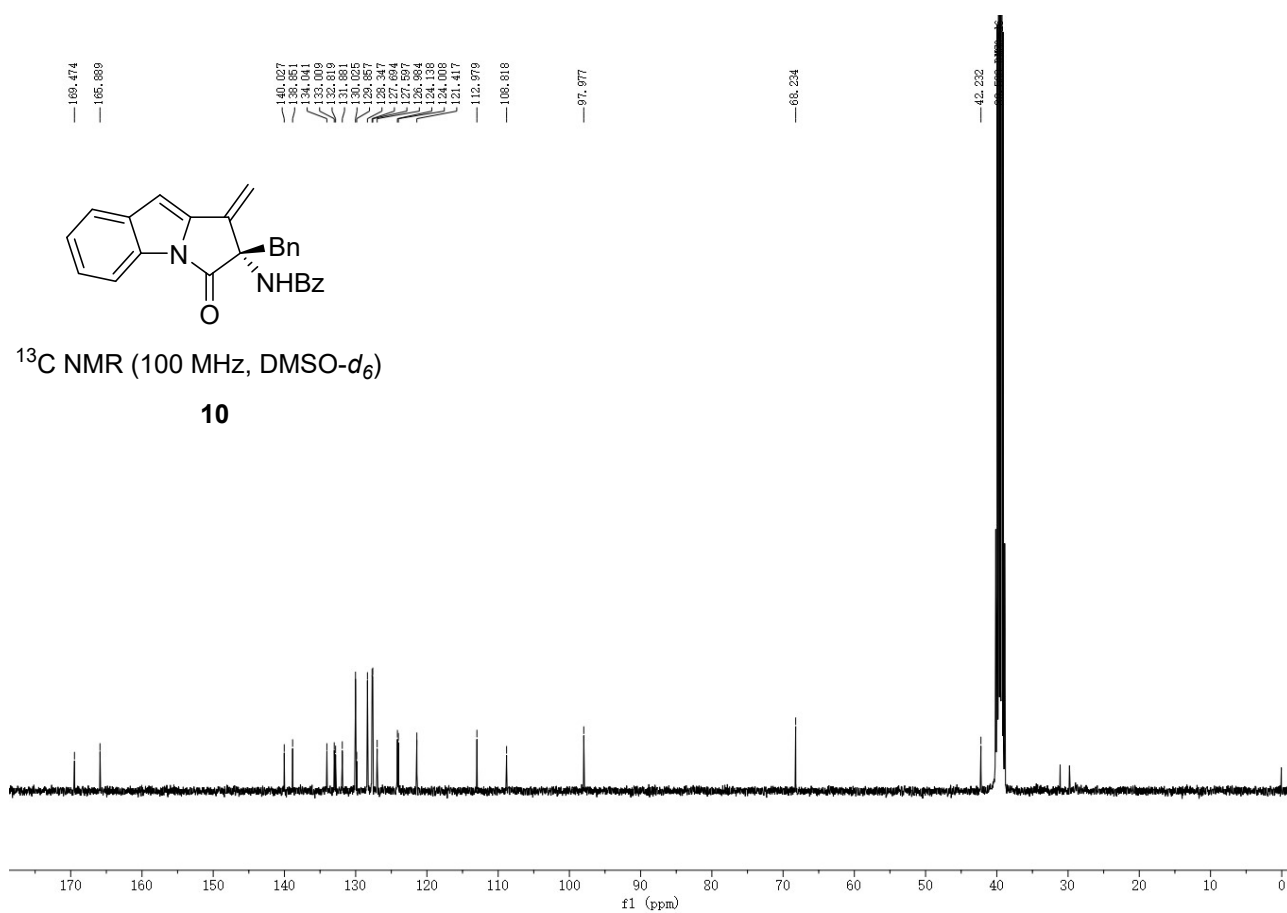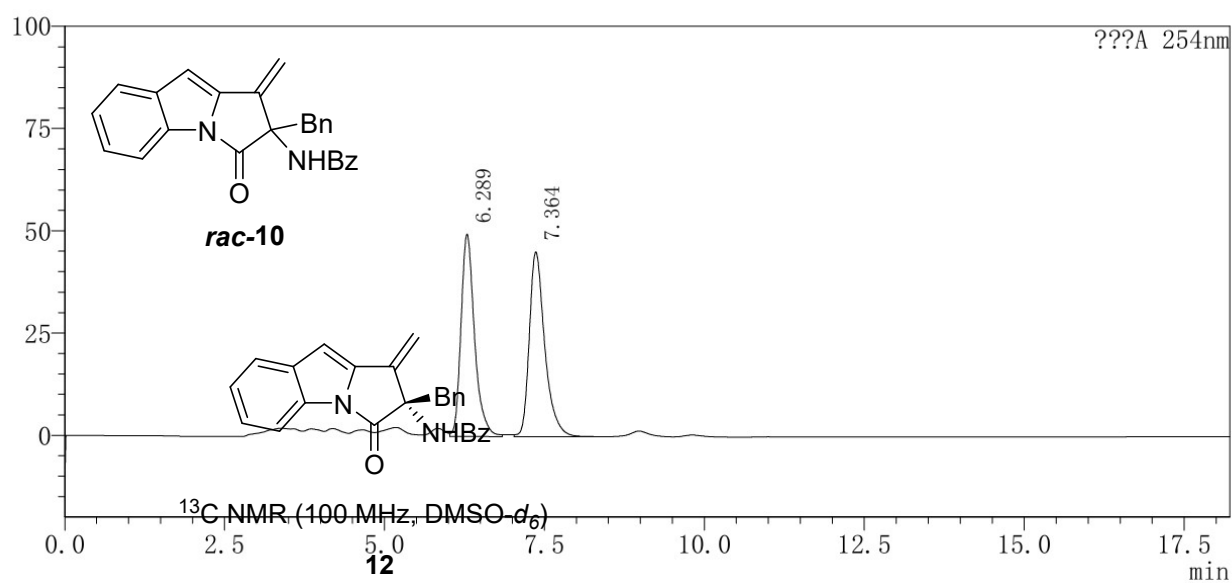

| Peak# | Ret. Time | Area    | Height | Area%   | Height% |
|-------|-----------|---------|--------|---------|---------|
| 1     | 6.289     | 730343  | 49500  | 48.982  | 52.306  |
| 2     | 7.364     | 760708  | 45135  | 51.018  | 47.694  |
| Total |           | 1491050 | 94635  | 100.000 | 100.000 |

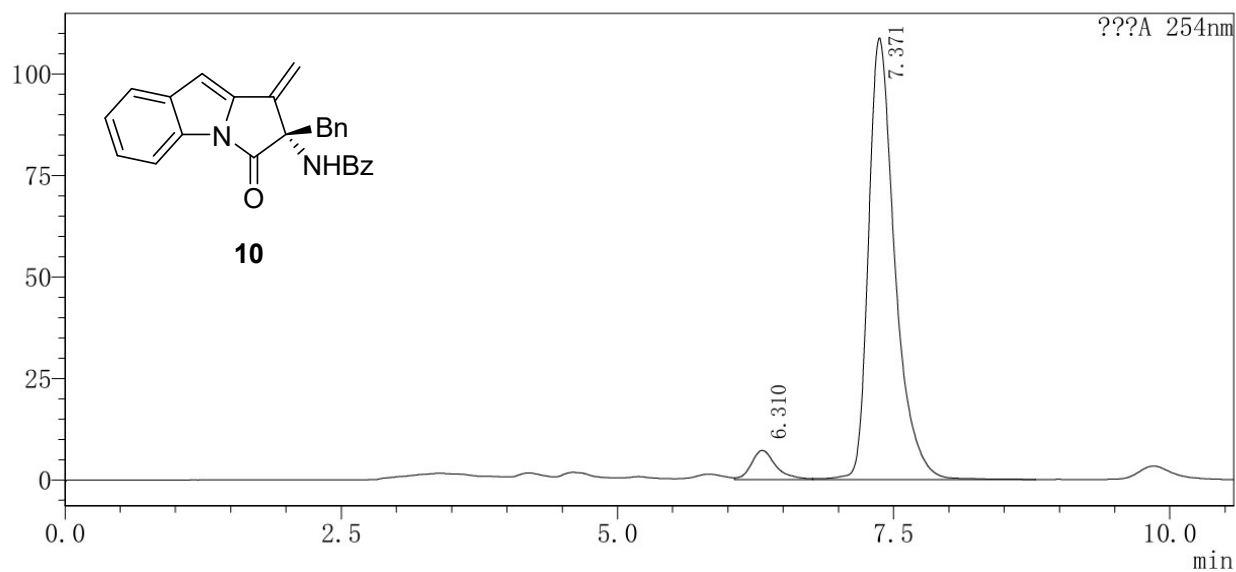

| Peak# | Ret. Time | Area    | Height | Area%   | Height% |
|-------|-----------|---------|--------|---------|---------|
| 1     | 6.310     | 110504  | 7166   | 5.749   | 6.186   |
| 2     | 7.371     | 1811606 | 108688 | 94.251  | 93.814  |
| Total |           | 1922110 | 115854 | 100.000 | 100.000 |

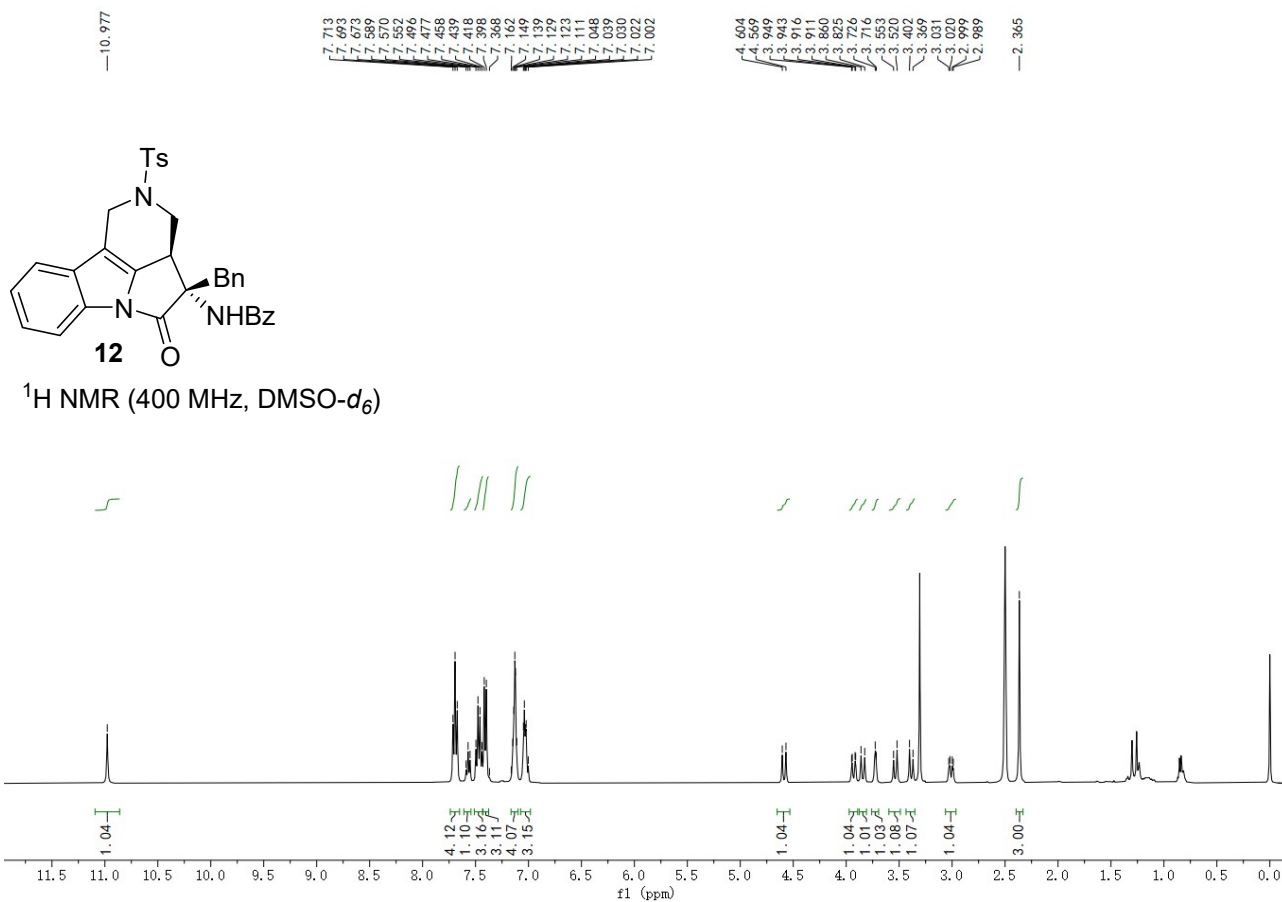

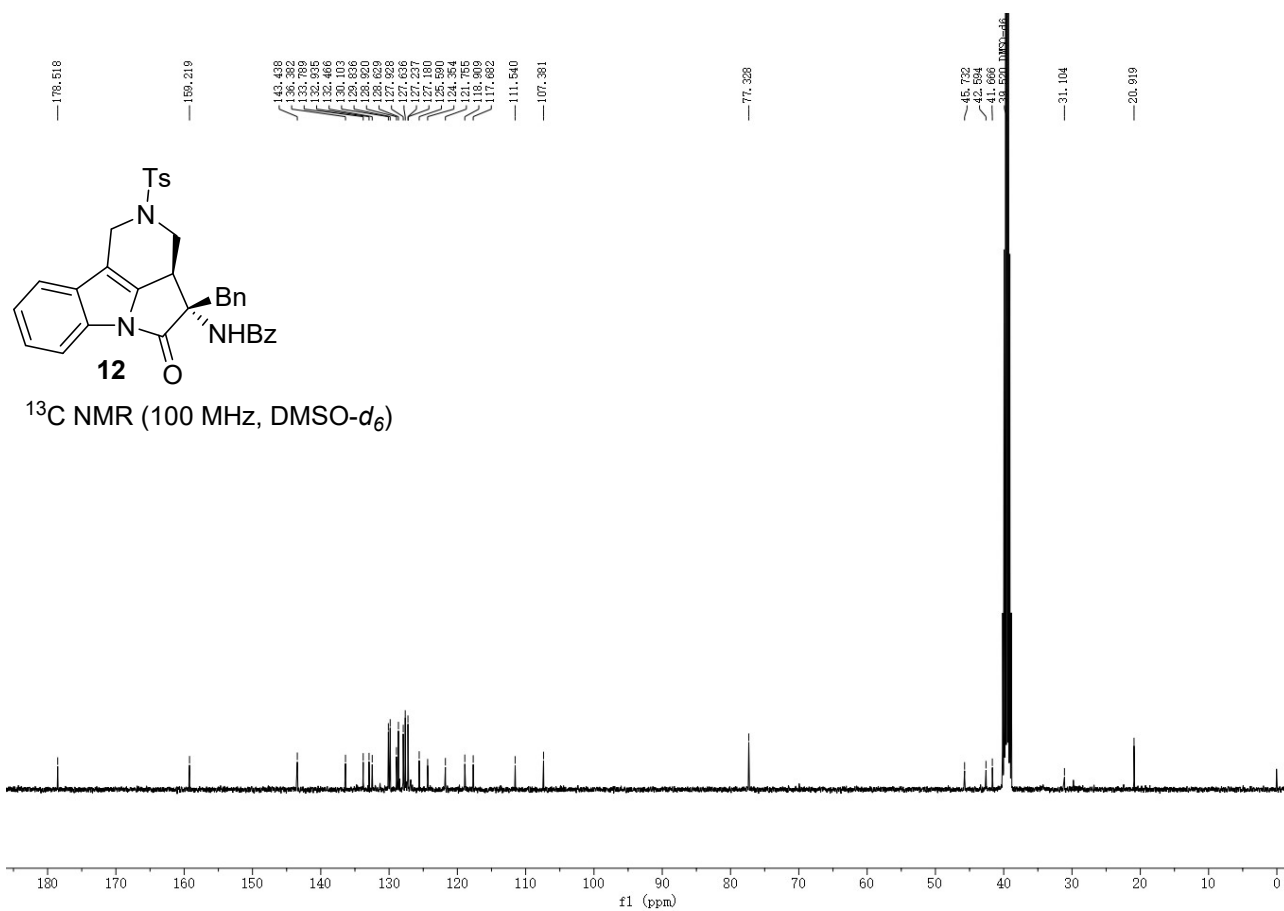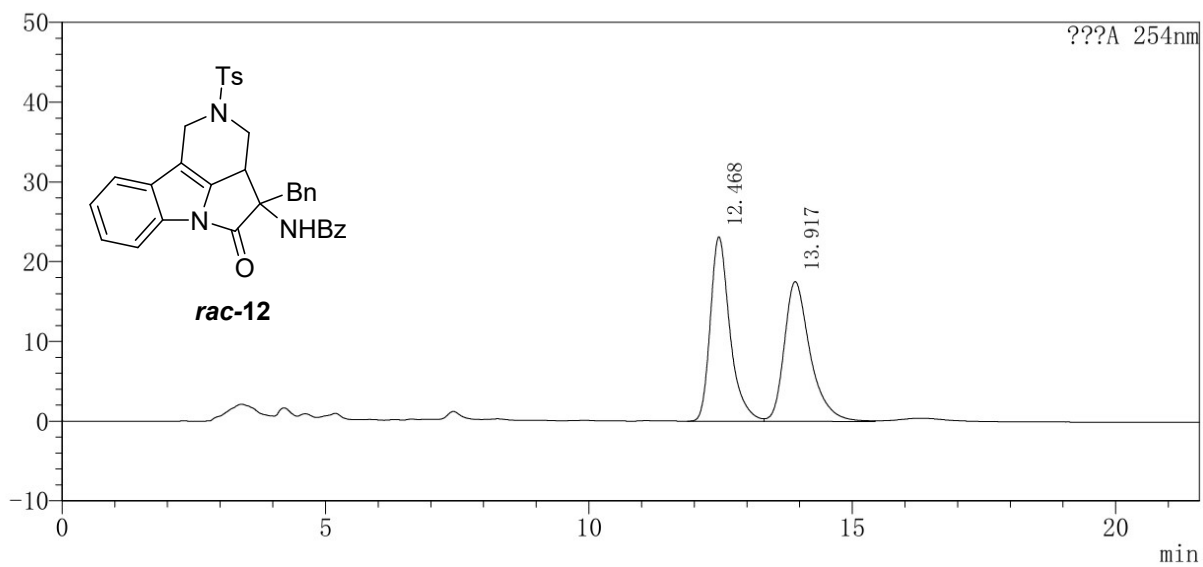

| Peak# | Ret. Time | Area    | Height | Area%   | Height% |
|-------|-----------|---------|--------|---------|---------|
| 1     | 12.468    | 599871  | 23115  | 49.971  | 56.870  |
| 2     | 13.917    | 600564  | 17530  | 50.029  | 43.130  |
| Total |           | 1200434 | 40646  | 100.000 | 100.000 |

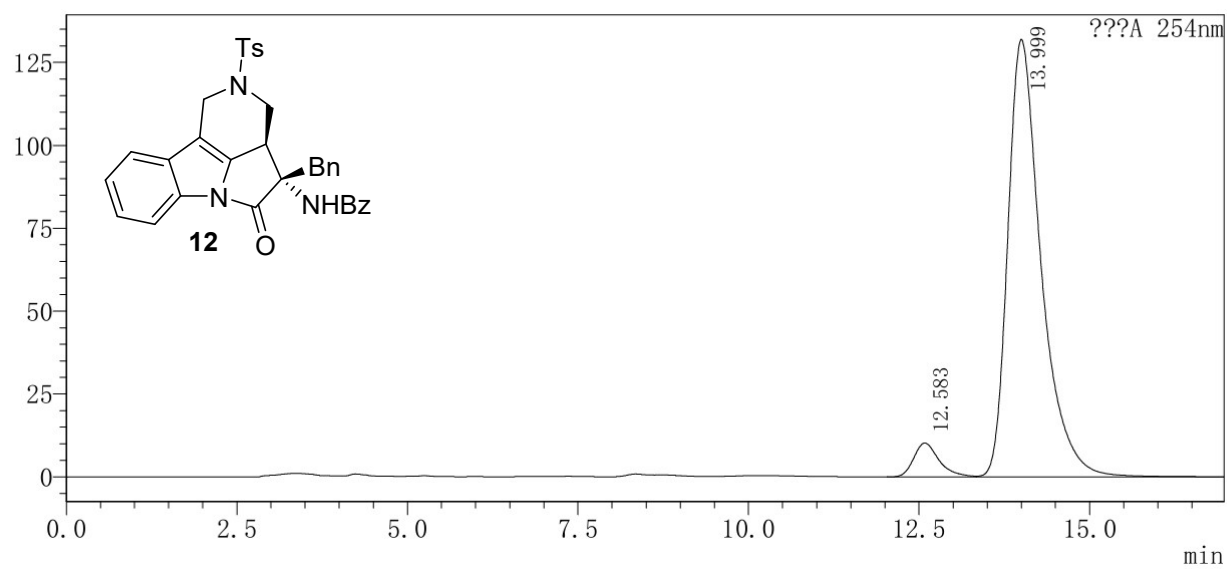

| Peak# | Ret. Time | Area    | Height | Area%   | Height% |
|-------|-----------|---------|--------|---------|---------|
| 1     | 12.583    | 266301  | 10217  | 5.622   | 7.185   |
| 2     | 13.999    | 4470429 | 131976 | 94.378  | 92.815  |
| Total |           | 4736730 | 142192 | 100.000 | 100.000 |
